# Supplementary material for: Transcriptional analysis reveals the metabolic state of Burkholderia zhejiangensis CEIB S4-3 during methyl parathion degradation
Source: PeerJ. 2019 Apr 24;7:e6822. doi: 10.7717/peerj.6822 (PMC6486813; doi:10.7717/peerj.6822)
Supplement: Supplemental Information 4 — For the determination of DEGs at the time 0 h with MP, a fold change analysis was carry out, the genes with differential expression profile were those that showed values of ±1.5 (p-value < 0.05). Data were used to construct Table 1 and Figs. 3–6. [file peerj-07-6822-s004.xlsx]

## Sheet: Time zero hours with MP
Table S4. DEGs at the time zero hours with MP
Locus_tag	Name	Function	COG	ID	Functional category	KO	log2 Fold Change
Ga0077592_107624	Ga0077592_107624	Predicted transporter (Major Facilitator Superfamily protein)				KO:K03446===emrB===MFS transporter, DHA2 family, multidrug resistance protein	-3.18463
Ga0077592_1115140	Ga0077592_1115140	Protein of unknown function (DUF4148)					-2.59752
Ga0077592_112816	Ga0077592_112816	Predicted arabinose efflux permease, MFS family	COG2814	[G]	Carbohydrate transport and metabolism		-2.53431
Ga0077592_104347	Ga0077592_104347	Hypothetical protein					-2.1644
Ga0077592_1115133	Ga0077592_1115133	Hypothetical protein					-2.09899
Ga0077592_1056102	marR_4	DNA-binding transcriptional regulator, MarR family	COG1846	[K]	Transcription		-1.99105
Ga0077592_107625	ttgV	DNA-binding transcriptional regulator, IclR family	COG1414	[K]	Transcription		-1.85656
Ga0077592_10935	Ga0077592_10935	Protein of unknown function (DUF4148)					-1.80768
