# Supplementary material for: Transcriptional analysis reveals the metabolic state of Burkholderia zhejiangensis CEIB S4-3 during methyl parathion degradation
Source: PeerJ. 2019 Apr 24;7:e6822. doi: 10.7717/peerj.6822 (PMC6486813; doi:10.7717/peerj.6822)
Supplement: Supplemental Information 5 — For the determination of DEGs at the time 3 h with MP, a fold change analysis was carry out, the genes with differential expression profile were those that showed values of ±1.5 (p-value < 0.05). Data were used to construct Table 1 and Figs. 3–6. [file peerj-07-6822-s005.xlsx]

## Sheet: Time three hours with MP
Table S5. DEGs at the time three hours with MP
Locus_tag	Name	Function	COG	ID	Functional category	KO	log2 Fold Change
Ga0077592_111573	Ga0077592_111573	hypothetical protein				0	1.50054
Ga0077592_101377	Ga0077592_101377	sarcosine oxidase subunit gamma	COG4583	[E]	Amino acid transport and metabolism	KO:K00305===soxG===sarcosine oxidase, subunit gamma [EC:1.5.3.1]	1.50105
Ga0077592_107253	Ga0077592_107253	respiratory nitrate reductase chaperone NarJ	COG2180	[C]	Energy production and conversion	KO:K00373===narJ===nitrate reductase delta subunit	1.505
Ga0077592_104963	Ga0077592_104963	N-formylglutamate deformylase	COG3741	[E]	Amino acid transport and metabolism	KO:K01458===hutG===N-formylglutamate deformylase [EC:3.5.1.68]	1.5061
Ga0077592_104150	paaN	phenylacetic acid degradation protein paaN	COG1012	[C]	Energy production and conversion	0	1.50612
Ga0077592_112822	iclA	isocitrate lyase	COG2224	[C]	Energy production and conversion	KO:K01637===E4.1.3.1, aceA===isocitrate lyase [EC:4.1.3.1]	1.5072
Ga0077592_11003	Ga0077592_11003	Predicted ATP-dependent carboligase, ATP-grasp superfamily	COG1821	[R]	General function prediction only	0	1.50895
Ga0077592_1043202	Ga0077592_1043202	hypothetical protein				0	1.51221
Ga0077592_1003138	Ga0077592_1003138	2-haloacid dehalogenase	COG1011	[H]	Coenzyme transport and metabolism	KO:K01560===E3.8.1.2===2-haloacid dehalogenase [EC:3.8.1.2]	1.51226
Ga0077592_107114	Ga0077592_107114	replication region DNA-binding N-term				0	1.51239
Ga0077592_1073160	yceI	Polyisoprenoid-binding protein YceI	COG2353	[R]	General function prediction only	0	1.51303
Ga0077592_111533	Ga0077592_111533	Selenocysteine lyase/Cysteine desulfurase	COG0520	[E]	Amino acid transport and metabolism	0	1.51517
Ga0077592_106512	Ga0077592_106512	L-proline dehydrogenase /delta-1-pyrroline-5-carboxylate dehydrogenase	COG4230	[E]	Amino acid transport and metabolism	KO:K13821===putA===RHH-type transcriptional regulator, proline utilization regulon repressor / proline dehydrogenase / delta 1-pyrroline-5-carboxylate dehydrogenase [EC:1.5.5.2 1.2.1.88]	1.51697
Ga0077592_101342	Ga0077592_101342	DNA-binding transcriptional regulator, XRE-family HTH domain	COG1476	[K]	Transcription	0	1.5184
Ga0077592_1154150	gntR_32	transcriptional regulator, GntR family	COG2186	[K]	Transcription	KO:K05799===pdhR===GntR family transcriptional regulator, transcriptional repressor for pyruvate dehydrogenase complex	1.52249
Ga0077592_10498	arsR	transcriptional regulator, ArsR family	COG0640	[K]	Transcription	KO:K03892===arsR===ArsR family transcriptional regulator	1.52353
Ga0077592_104921	Ga0077592_104921	3-methylcrotonoyl-CoA carboxylase, alpha subunit	COG4770	[I]	Lipid transport and metabolism	KO:K01968===E6.4.1.4A===3-methylcrotonyl-CoA carboxylase alpha subunit [EC:6.4.1.4]	1.52659
Ga0077592_1073455	mreC	rod shape-determining protein MreC	COG1792	[D]	Cell cycle control, cell division, chromosome partitioning	KO:K03570===mreC===rod shape-determining protein MreC	1.53286
Ga0077592_1073284	rpoH	RNA polymerase sigma-32 factor	COG0568	[K]	Transcription	KO:K03089===SIG3.3.1, rpoH===RNA polymerase sigma-32 factor	1.53368
Ga0077592_1043123	Ga0077592_1043123	xylulose-5-phosphate/fructose-6-phosphate phosphoketolase	COG3957	[G]	Carbohydrate transport and metabolism	KO:K01621===xfp, xpk===xylulose-5-phosphate/fructose-6-phosphate phosphoketolase [EC:4.1.2.9 4.1.2.22]	1.53513
Ga0077592_1003241	lysR_2	transcriptional regulator, LysR family	COG0583	[K]	Transcription	KO:K03566===gcvA===LysR family transcriptional regulator, glycine cleavage system transcriptional activator	1.53587
Ga0077592_101054	Ga0077592_101054	malonate decarboxylase beta subunit	COG0777	[I]	Lipid transport and metabolism	KO:K13932===mdcD===malonate decarboxylase beta subunit [EC:4.1.1.87]	1.53597
Ga0077592_115493	kynU	Kynureninase	COG3844	[E]	Amino acid transport and metabolism	KO:K01556===KYNU, kynU===kynureninase [EC:3.7.1.3]	1.53639
Ga0077592_1016161	Ga0077592_1016161	methylglutaconyl-CoA hydratase	COG1024	[I]	Lipid transport and metabolism	KO:K13766===liuC===methylglutaconyl-CoA hydratase [EC:4.2.1.18]	1.53693
Ga0077592_101366	Ga0077592_101366	glycine betaine/proline transport system ATP-binding protein	COG4175	[E]	Amino acid transport and metabolism	KO:K02000===proV===glycine betaine/proline transport system ATP-binding protein [EC:3.6.3.32]	1.53964
Ga0077592_10316	Ga0077592_10316	Glyoxalase-like domain-containing protein				0	1.54567
Ga0077592_100910	Ga0077592_100910	Nucleotide-binding universal stress protein, UspA family	COG0589	[T]	Signal transduction mechanisms	0	1.54747
Ga0077592_112151	Ga0077592_112151	Ribosomal protein S18 acetylase RimI	COG0456	[J]	Translation, ribosomal structure and biogenesis	0	1.55015
Ga0077592_111061	Ga0077592_111061	hypothetical protein				0	1.55281
Ga0077592_1092104	Ga0077592_1092104	mercuric reductase	COG1249	[C]	Energy production and conversion	KO:K00520===merA===mercuric reductase [EC:1.16.1.1]	1.55358
Ga0077592_11002	Ga0077592_11002	probable H4MPT-linked C1 transfer pathway protein	COG1548	[S]	Function unknown	0	1.5544
Ga0077592_1056142	Ga0077592_1056142	Protein of unknown function (DUF3563)				0	1.55471
Ga0077592_1109109	rplA	LSU ribosomal protein L1P	COG0081	[J]	Translation, ribosomal structure and biogenesis	KO:K02863===RP-L1, MRPL1, rplA===large subunit ribosomal protein L1	1.55619
Ga0077592_105121	Ga0077592_105121	2-dehydro-3-deoxyphosphogalactonate aldolase	COG0800	[G]	Carbohydrate transport and metabolism	KO:K01631===dgoA===2-dehydro-3-deoxyphosphogalactonate aldolase [EC:4.1.2.21]	1.55727
Ga0077592_1109110	rplK	LSU ribosomal protein L11P	COG0080	[J]	Translation, ribosomal structure and biogenesis	KO:K02867===RP-L11, MRPL11, rplK===large subunit ribosomal protein L11	1.55945
Ga0077592_114033	Ga0077592_114033	Superfamily II DNA and RNA helicase	COG0513	[L]	Replication, recombination and repair	0	1.55958
Ga0077592_114031	uspA_2	Nucleotide-binding universal stress protein, UspA family	COG0589	[T]	Signal transduction mechanisms	0	1.55976
Ga0077592_1115194	Ga0077592_1115194	hypothetical protein				0	1.56233
Ga0077592_1109114	tufA1_2	translation elongation factor 1A (EF-1A/EF-Tu)	COG0050	[J]	Translation, ribosomal structure and biogenesis	KO:K02358===tuf, TUFM===elongation factor Tu	1.56434
Ga0077592_1045390	Ga0077592_1045390	metal dependent phosphohydrolase				KO:K01139===spoT, HDDC3===guanosine-3',5'-bis(diphosphate) 3'-pyrophosphohydrolase [EC:3.1.7.2]	1.56447
Ga0077592_10741	Ga0077592_10741	Integrase core domain-containing protein				KO:K07497===K07497===putative transposase	1.56741
Ga0077592_104570	Ga0077592_104570	Predicted Fe2+/Mn2+ transporter, VIT1/CCC1 family	COG1814	[P]	Inorganic ion transport and metabolism	0	1.57543
Ga0077592_11256	Ga0077592_11256	hypothetical protein	COG3607	[R]	General function prediction only	KO:K07032===K07032===uncharacterized protein	1.57858
Ga0077592_108111	Ga0077592_108111	L-serine dehydratase	COG1760	[E]	Amino acid transport and metabolism	KO:K01752===E4.3.1.17, sdaA, sdaB, tdcG===L-serine dehydratase [EC:4.3.1.17]	1.58027
Ga0077592_106522	atpD2	ATP synthase F1 subcomplex beta subunit	COG0055	[C]	Energy production and conversion	KO:K02112===ATPF1B, atpD===F-type H+-transporting ATPase subunit beta [EC:3.6.3.14]	1.58342
Ga0077592_105883	Ga0077592_105883	poly(3-hydroxyalkanoate) depolymerase	COG0596	[H]	Coenzyme transport and metabolism	0	1.58411
Ga0077592_112837	Ga0077592_112837	DNA-binding transcriptional regulator, AcrR family	COG1309	[K]	Transcription	0	1.58442
Ga0077592_1003201	Ga0077592_1003201	Nucleoside-diphosphate-sugar epimerase	COG0451	[M]	Cell wall/membrane/envelope biogenesis	0	1.58447
Ga0077592_1032149	Ga0077592_1032149	malate:Na+ symporter	COG3493	[C]	Energy production and conversion	KO:K11616===maeN===malate:Na+ symporter	1.58522
Ga0077592_113612	Ga0077592_113612	CRISPR-associated helicase, Cas3 family				KO:K07012===cas3===CRISPR-associated endonuclease/helicase Cas3 [EC:3.1.-.- 3.6.4.-]	1.58641
Ga0077592_1109108	rplJ	LSU ribosomal protein L10P	COG0244	[J]	Translation, ribosomal structure and biogenesis	KO:K02864===RP-L10, MRPL10, rplJ===large subunit ribosomal protein L10	1.58795
Ga0077592_107240	Ga0077592_107240	hypothetical protein				0	1.59266
Ga0077592_1097128	iclR_15	DNA-binding transcriptional regulator, IclR family	COG1414	[K]	Transcription	0	1.59319
Ga0077592_109785	Ga0077592_109785	hypothetical protein	COG0730	[S]	Function unknown	KO:K07090===K07090===uncharacterized protein	1.5956
Ga0077592_1045519	Ga0077592_1045519	DNA-binding transcriptional regulator, LysR family	COG0583	[K]	Transcription	0	1.59598
Ga0077592_1084190	Ga0077592_1084190	oxygen-independent coproporphyrinogen-3 oxidase	COG0635	[H]	Coenzyme transport and metabolism	KO:K02495===hemN, hemZ===oxygen-independent coproporphyrinogen III oxidase [EC:1.3.99.22]	1.60146
Ga0077592_11363	betB	betaine aldehyde dehydrogenase	COG1012	[C]	Energy production and conversion	KO:K00130===betB, gbsA===betaine-aldehyde dehydrogenase [EC:1.2.1.8]	1.6025
Ga0077592_110954	Ga0077592_110954	Tfp pilus assembly protein PilO	COG3167	[N]	Cell motility	0	1.60905
Ga0077592_103732	amn	AMP nucleosidase	COG0775	[F]	Nucleotide transport and metabolism	KO:K01241===amn===AMP nucleosidase [EC:3.2.2.4]	1.61174
Ga0077592_11231	Ga0077592_11231	ring-1,2-phenylacetyl-CoA epoxidase subunit PaaA				KO:K02609===paaA===ring-1,2-phenylacetyl-CoA epoxidase subunit PaaA [EC:1.14.13.149]	1.61207
Ga0077592_109239	Ga0077592_109239	Cu(I)-responsive transcriptional regulator	COG0789	[K]	Transcription	KO:K19591===cueR===MerR family transcriptional regulator, copper efflux regulator	1.62238
Ga0077592_1097167	Ga0077592_1097167	Uncharacterized conserved protein	COG4313	[S]	Function unknown	0	1.62336
Ga0077592_102548	Ga0077592_102548	hypothetical protein				0	1.62409
Ga0077592_109632	Ga0077592_109632	hypothetical protein				0	1.62605
Ga0077592_10933	Ga0077592_10933	GTP cyclohydrolase II	COG0807	[H]	Coenzyme transport and metabolism	KO:K01497===ribA, RIB1===GTP cyclohydrolase II [EC:3.5.4.25]	1.62622
Ga0077592_114032	aceA	isocitrate lyase	COG2224	[C]	Energy production and conversion	KO:K01637===E4.1.3.1, aceA===isocitrate lyase [EC:4.1.3.1]	1.6291
Ga0077592_1073431	Ga0077592_1073431	hypothetical protein				0	1.63163
Ga0077592_112839	Ga0077592_112839	DNA-binding transcriptional regulator, LysR family	COG0583	[K]	Transcription	0	1.63238
Ga0077592_1073290	Ga0077592_1073290	DNA-binding transcriptional regulator, MarR family	COG1846	[K]	Transcription	0	1.63314
Ga0077592_1016141	Ga0077592_1016141	hypothetical protein				KO:K07117===K07117===uncharacterized protein	1.63349
Ga0077592_1073323	Ga0077592_1073323	hypothetical protein	COG2960	[S]	Function unknown	KO:K09806===K09806===uncharacterized protein	1.64425
Ga0077592_106428	Ga0077592_106428	NADH dehydrogenase	COG1252	[C]	Energy production and conversion	KO:K03885===ndh===NADH dehydrogenase [EC:1.6.99.3]	1.64509
Ga0077592_1045435	Ga0077592_1045435	NTE family protein	COG1752	[R]	General function prediction only	KO:K07001===K07001===NTE family protein	1.64627
Ga0077592_108531	Ga0077592_108531	Outer membrane protein (porin)	COG3203	[M]	Cell wall/membrane/envelope biogenesis	0	1.65245
Ga0077592_1016172	acoB	pyruvate dehydrogenase E1 component beta subunit	COG0022	[C]	Energy production and conversion	KO:K00162===PDHB, pdhB===pyruvate dehydrogenase E1 component beta subunit [EC:1.2.4.1]	1.65362
Ga0077592_111241	Ga0077592_111241	hypothetical protein				0	1.65473
Ga0077592_1119109	Ga0077592_1119109	hypothetical protein				0	1.65563
Ga0077592_114253	Ga0077592_114253	ribonucleoside-diphosphate reductase class II	COG0209	[F]	Nucleotide transport and metabolism	KO:K00525===E1.17.4.1A, nrdA, nrdE===ribonucleoside-diphosphate reductase alpha chain [EC:1.17.4.1]	1.65721
Ga0077592_112540	Ga0077592_112540	hypothetical protein				0	1.65861
Ga0077592_1045201	lacI_4	transcriptional regulator, LacI family	COG1879	[G]	Carbohydrate transport and metabolism	KO:K02529===lacI, galR===LacI family transcriptional regulator	1.65986
Ga0077592_1073433	Ga0077592_1073433	indolepyruvate ferredoxin oxidoreductase	COG4231	[C]	Energy production and conversion	KO:K04090===E1.2.7.8===indolepyruvate ferredoxin oxidoreductase [EC:1.2.7.8]	1.66264
Ga0077592_110983	rplF	LSU ribosomal protein L6P	COG0097	[J]	Translation, ribosomal structure and biogenesis	KO:K02933===RP-L6, MRPL6, rplF===large subunit ribosomal protein L6	1.66363
Ga0077592_108246	Ga0077592_108246	5,10-methenyltetrahydrofolate synthetase	COG0212	[H]	Coenzyme transport and metabolism	0	1.66761
Ga0077592_104548	Ga0077592_104548	aldose 1-epimerase	COG2017	[G]	Carbohydrate transport and metabolism	KO:K01785===galM, GALM===aldose 1-epimerase [EC:5.1.3.3]	1.66957
Ga0077592_104110	tetR_2	DNA-binding transcriptional regulator, AcrR family	COG1309	[K]	Transcription	0	1.6714
Ga0077592_1115196	Ga0077592_1115196	EamA domain-containing membrane protein RarD	COG2962	[S]	Function unknown	0	1.6738
Ga0077592_108231	ahcY	adenosylhomocysteinase	COG0499	[H]	Coenzyme transport and metabolism	KO:K01251===E3.3.1.1, ahcY===adenosylhomocysteinase [EC:3.3.1.1]	1.67543
Ga0077592_101368	araC_3	Transcriptional regulator GlxA family, contains an amidase domain and an AraC-type DNA-binding HTH domain	COG4977	[K]	Transcription	0	1.67785
Ga0077592_1073421	Ga0077592_1073421	Outer membrane protein (porin)	COG3203	[M]	Cell wall/membrane/envelope biogenesis	0	1.67872
Ga0077592_114083	Ga0077592_114083	Regulator of protease activity HflC, stomatin/prohibitin superfamily	COG0330	[O]	Post-translational modification, protein turnover, and chaperones	0	1.67968
Ga0077592_10722	nahW	salicylate hydroxylase	COG0654	[H]	Coenzyme transport and metabolism	KO:K00480===E1.14.13.1===salicylate hydroxylase [EC:1.14.13.1]	1.68293
Ga0077592_1012150	Ga0077592_1012150	flagellar transcriptional activator FlhC				KO:K02402===flhC===flagellar transcriptional activator FlhC	1.6877
Ga0077592_108421	lacI_7	DNA-binding transcriptional regulator, LacI/PurR family	COG1609	[K]	Transcription	0	1.69239
Ga0077592_1092124	Ga0077592_1092124	PD-(D/E)XK nuclease superfamily protein				0	1.69487
Ga0077592_109294	Ga0077592_109294	arsenate reductase	COG1393	[P]	Inorganic ion transport and metabolism	KO:K00537===ARSC1, arsC===arsenate reductase [EC:1.20.4.1]	1.69642
Ga0077592_102546	Ga0077592_102546	hypothetical protein				0	1.70613
Ga0077592_113476	argD_2	succinylornithine aminotransferase apoenzyme	COG4992	[E]	Amino acid transport and metabolism	KO:K00821===argD===acetylornithine/N-succinyldiaminopimelate aminotransferase [EC:2.6.1.11 2.6.1.17]	1.70628
Ga0077592_10361	paaK	ring-1,2-phenylacetyl-CoA epoxidase subunit PaaE	COG1018	[C]	Energy production and conversion	KO:K02613===paaE===ring-1,2-phenylacetyl-CoA epoxidase subunit PaaE	1.70697
Ga0077592_101053	Ga0077592_101053	malonate decarboxylase delta subunit				KO:K13931===mdcC===malonate decarboxylase delta subunit	1.70816
Ga0077592_110993	rplV	LSU ribosomal protein L22P	COG0091	[J]	Translation, ribosomal structure and biogenesis	KO:K02890===RP-L22, MRPL22, rplV===large subunit ribosomal protein L22	1.70861
Ga0077592_1073405	Ga0077592_1073405	Ubiquinone biosynthesis hydroxylase, UbiH/UbiF/VisC/COQ6 family	COG0654	[H]	Coenzyme transport and metabolism	0	1.70942
Ga0077592_100343	Ga0077592_100343	cellulose synthase operon protein YhjQ	COG1192	[N]	Cell motility	0	1.71638
Ga0077592_10363	Ga0077592_10363	ring-1,2-phenylacetyl-CoA epoxidase subunit PaaC	COG3396	[Q]	Secondary metabolites biosynthesis, transport, and catabolism	KO:K02611===paaC===ring-1,2-phenylacetyl-CoA epoxidase subunit PaaC [EC:1.14.13.149]	1.71656
Ga0077592_1016163	Ga0077592_1016163	molybdate transport system permease protein	COG4149	[P]	Inorganic ion transport and metabolism	KO:K02018===modB===molybdate transport system permease protein	1.72002
Ga0077592_114019	Ga0077592_114019	3-oxoadipyl-CoA thiolase	COG0183	[I]	Lipid transport and metabolism	0	1.7246
Ga0077592_1045513	Ga0077592_1045513	Double zinc ribbon				0	1.72709
Ga0077592_115449	xdhC	xanthine dehydrogenase accessory protein XdhC				0	1.72854
Ga0077592_104546	Ga0077592_104546	transcriptional regulator, LacI family	COG1609	[K]	Transcription	KO:K02529===lacI, galR===LacI family transcriptional regulator	1.73172
Ga0077592_112332	Ga0077592_112332	conserved hypothetical integral membrane protein	COG2855	[S]	Function unknown	0	1.73396
Ga0077592_1109101	fusA	translation elongation factor 2 (EF-2/EF-G)	COG0480	[J]	Translation, ribosomal structure and biogenesis	KO:K02355===fusA, GFM, EFG===elongation factor G	1.73622
Ga0077592_1016251	Ga0077592_1016251	hypothetical protein				0	1.73658
Ga0077592_103416	Ga0077592_103416	hypothetical protein				0	1.73702
Ga0077592_1092101	Ga0077592_1092101	mercuric ion transport protein				KO:K08363===merT===mercuric ion transport protein	1.73758
Ga0077592_101375	Ga0077592_101375	sarcosine oxidase subunit delta	COG4311	[E]	Amino acid transport and metabolism	KO:K00304===soxD===sarcosine oxidase, subunit delta [EC:1.5.3.1]	1.74002
Ga0077592_1043130	Ga0077592_1043130	Protein of unknown function (DUF2964)				0	1.74166
Ga0077592_107222	Ga0077592_107222	Oxidoreductase molybdopterin binding domain-containing protein				0	1.74302
Ga0077592_1045287	Ga0077592_1045287	hypothetical protein				0	1.74357
Ga0077592_108241	Ga0077592_108241	Uncharacterized membrane protein	COG3819	[S]	Function unknown	0	1.74422
Ga0077592_100912	Ga0077592_100912	hypothetical protein				0	1.74423
Ga0077592_107136	Ga0077592_107136	Conjugal transfer protein TrbH				0	1.74823
Ga0077592_101232	Ga0077592_101232	nucleoside ABC transporter membrane protein	COG1079	[R]	General function prediction only	KO:K02057===ABC.SS.P===simple sugar transport system permease protein	1.74886
Ga0077592_103727	Ga0077592_103727	peroxiredoxin, Ohr subfamily	COG1764	[V]	Defense mechanisms	0	1.74952
Ga0077592_1073148	Ga0077592_1073148	hypothetical protein				0	1.75069
Ga0077592_100931	Ga0077592_100931	Uncharacterized conserved protein YbjT, contains NAD(P)-binding and DUF2867 domains	COG0702	[R]	General function prediction only	0	1.75206
Ga0077592_10984	Ga0077592_10984	Protein N-acetyltransferase, RimJ/RimL family	COG1670	[O]	Post-translational modification, protein turnover, and chaperones	0	1.75648
Ga0077592_1140106	alc	allantoicase	COG4266	[F]	Nucleotide transport and metabolism	KO:K01477===alc, ALLC===allantoicase [EC:3.5.3.4]	1.76014
Ga0077592_110982	rplR	LSU ribosomal protein L18P	COG0256	[J]	Translation, ribosomal structure and biogenesis	KO:K02881===RP-L18, MRPL18, rplR===large subunit ribosomal protein L18	1.76545
Ga0077592_113485	Ga0077592_113485	Uncharacterized membrane protein YccC	COG1289	[S]	Function unknown	0	1.76637
Ga0077592_1016190	Ga0077592_1016190	prolyl 4-hydroxylase				KO:K00472===E1.14.11.2===prolyl 4-hydroxylase [EC:1.14.11.2]	1.76839
Ga0077592_1045264	Ga0077592_1045264	His Kinase A (phospho-acceptor) domain-containing protein				KO:K13924===cheBR===two-component system, chemotaxis family, CheB/CheR fusion protein [EC:2.1.1.80 3.1.1.61]	1.78306
Ga0077592_10792	Ga0077592_10792	Transposase	COG3547	[X]	Mobilome: prophages, transposons	0	1.79021
Ga0077592_10365	paaA	ring-1,2-phenylacetyl-CoA epoxidase subunit PaaA	COG3396	[Q]	Secondary metabolites biosynthesis, transport, and catabolism	KO:K02609===paaA===ring-1,2-phenylacetyl-CoA epoxidase subunit PaaA [EC:1.14.13.149]	1.80009
Ga0077592_106415	Ga0077592_106415	peptide/nickel transport system ATP-binding protein	COG1123	[O]	Post-translational modification, protein turnover, and chaperones	KO:K02032===ABC.PE.A1===peptide/nickel transport system ATP-binding protein	1.80131
Ga0077592_101092	Ga0077592_101092	hypothetical protein				0	1.80218
Ga0077592_1003122	Ga0077592_1003122	HSP20 family protein	COG0071	[O]	Post-translational modification, protein turnover, and chaperones	KO:K13993===HSP20===HSP20 family protein	1.80295
Ga0077592_103439	Ga0077592_103439	hypothetical protein	COG4288	[S]	Function unknown	0	1.80512
Ga0077592_115327	Ga0077592_115327	Short-chain dehydrogenase	COG0300	[R]	General function prediction only	0	1.80565
Ga0077592_1003323	Ga0077592_1003323	HTH-type transcriptional regulator / antitoxin HipB	COG1476	[K]	Transcription	KO:K15773===hipB===HTH-type transcriptional regulator / antitoxin HipB	1.80684
Ga0077592_112333	Ga0077592_112333	Anaerobic selenocysteine-containing dehydrogenase	COG0243	[C]	Energy production and conversion	0	1.80814
Ga0077592_103437	Ga0077592_103437	Nucleotide-binding universal stress protein, UspA family	COG0589	[T]	Signal transduction mechanisms	0	1.81001
Ga0077592_10981	Ga0077592_10981	2Fe-2S iron-sulfur cluster binding domain-containing protein				KO:K02613===paaE===ring-1,2-phenylacetyl-CoA epoxidase subunit PaaE	1.81489
Ga0077592_1097164	Ga0077592_1097164	Ketosteroid isomerase-related protein	COG3631	[R]	General function prediction only	0	1.81742
Ga0077592_114060	Ga0077592_114060	hypothetical protein				0	1.8195
Ga0077592_107258	Ga0077592_107258	nitronate monooxygenase	COG2070	[R]	General function prediction only	KO:K00459===ncd2, npd===nitronate monooxygenase [EC:1.13.12.16]	1.81968
Ga0077592_104312	Ga0077592_104312	assimilatory nitrite reductase (NAD(P)H) small subunit	COG2146	[P]	Inorganic ion transport and metabolism	KO:K00363===nirD===nitrite reductase (NADH) small subunit [EC:1.7.1.15]	1.81974
Ga0077592_10312	Ga0077592_10312	putative toxin-antitoxin system antitoxin component, TIGR02293 family	COG5642	[S]	Function unknown	0	1.82524
Ga0077592_1097229	Ga0077592_1097229	Protein of unknown function (DUF1045)				0	1.82696
Ga0077592_1003123	Ga0077592_1003123	Molecular chaperone IbpA, HSP20 family	COG0071	[O]	Post-translational modification, protein turnover, and chaperones	0	1.82955
Ga0077592_1097278	Ga0077592_1097278	efflux transporter, outer membrane factor (OMF) lipoprotein, NodT family	COG1538	[M]	Cell wall/membrane/envelope biogenesis	0	1.83027
Ga0077592_108228	Ga0077592_108228	holin-like protein	COG1380	[R]	General function prediction only	KO:K06518===cidA===holin-like protein	1.83547
Ga0077592_1097268	gntR_20	DNA-binding transcriptional regulator, GntR family	COG1802	[K]	Transcription	0	1.84213
Ga0077592_11532	Ga0077592_11532	hypothetical protein				0	1.84899
Ga0077592_107250	Ga0077592_107250	cytochrome bo3 quinol oxidase subunit 2	COG1622	[C]	Energy production and conversion	KO:K02297===cyoA===cytochrome o ubiquinol oxidase subunit II [EC:1.10.3.-]	1.85597
Ga0077592_110989	rpsQ	SSU ribosomal protein S17P	COG0186	[J]	Translation, ribosomal structure and biogenesis	KO:K02961===RP-S17, MRPS17, rpsQ===small subunit ribosomal protein S17	1.85662
Ga0077592_110981	rpsE	SSU ribosomal protein S5P	COG0098	[J]	Translation, ribosomal structure and biogenesis	KO:K02988===RP-S5, MRPS5, rpsE===small subunit ribosomal protein S5	1.85828
Ga0077592_101638	Ga0077592_101638	hypothetical protein				0	1.86171
Ga0077592_1140104	BCAL2040	putative urate catabolism protein	COG0726	[G]	Carbohydrate transport and metabolism	0	1.86261
Ga0077592_1045437	Ga0077592_1045437	acetoacetate decarboxylase	COG4689	[Q]	Secondary metabolites biosynthesis, transport, and catabolism	KO:K01574===adc===acetoacetate decarboxylase [EC:4.1.1.4]	1.87385
Ga0077592_115439	groL1	chaperonin GroEL	COG0459	[O]	Post-translational modification, protein turnover, and chaperones	KO:K04077===groEL, HSPD1===chaperonin GroEL	1.87464
Ga0077592_107321	Ga0077592_107321	nucleobase:cation symporter-2, NCS2 family	COG2233	[F]	Nucleotide transport and metabolism	KO:K03458===TC.NCS2===nucleobase:cation symporter-2, NCS2 family	1.8759
Ga0077592_112817	Ga0077592_112817	protein of unknown function (DUF4148)				0	1.87926
Ga0077592_1056143	merR_1	Cu(I)-responsive transcriptional regulator	COG0789	[K]	Transcription	0	1.87956
Ga0077592_1056145	Ga0077592_1056145	dTDP-4-dehydrorhamnose reductase	COG1091	[M]	Cell wall/membrane/envelope biogenesis	KO:K00067===rfbD, rmlD===dTDP-4-dehydrorhamnose reductase [EC:1.1.1.133]	1.88134
Ga0077592_112539	Ga0077592_112539	hypothetical protein				0	1.88336
Ga0077592_110995	rplB	LSU ribosomal protein L2P	COG0090	[J]	Translation, ribosomal structure and biogenesis	KO:K02886===RP-L2, MRPL2, rplB===large subunit ribosomal protein L2	1.89191
Ga0077592_10233	Ga0077592_10233	hypothetical protein				0	1.89484
Ga0077592_110991	rplP	LSU ribosomal protein L16P	COG0197	[J]	Translation, ribosomal structure and biogenesis	KO:K02878===RP-L16, MRPL16, rplP===large subunit ribosomal protein L16	1.89732
Ga0077592_115440	groS	chaperonin GroES	COG0234	[O]	Post-translational modification, protein turnover, and chaperones	KO:K04078===groES, HSPE1===chaperonin GroES	1.89751
Ga0077592_113447	Ga0077592_113447					0	1.9
Ga0077592_11361	fdsA	glutathione-independent formaldehyde dehydrogenase	COG1063	[E]	Amino acid transport and metabolism	KO:K00148===fdhA===glutathione-independent formaldehyde dehydrogenase [EC:1.2.1.46]	1.90132
Ga0077592_110979	rplO	LSU ribosomal protein L15P	COG0200	[J]	Translation, ribosomal structure and biogenesis	KO:K02876===RP-L15, MRPL15, rplO===large subunit ribosomal protein L15	1.90403
Ga0077592_1154100	Ga0077592_1154100	type IV pilus assembly protein PilE	COG4968	[N]	Cell motility	KO:K02655===pilE===type IV pilus assembly protein PilE	1.90436
Ga0077592_1109105	rpoC	DNA-directed RNA polymerase subunit beta'	COG0086	[K]	Transcription	KO:K03046===rpoC===DNA-directed RNA polymerase subunit beta' [EC:2.7.7.6]	1.90709
Ga0077592_110980	rpmD	LSU ribosomal protein L30P	COG1841	[J]	Translation, ribosomal structure and biogenesis	KO:K02907===RP-L30, MRPL30, rpmD===large subunit ribosomal protein L30	1.90848
Ga0077592_10922	Ga0077592_10922	Cd2+/Zn2+-exporting ATPase	COG2217	[P]	Inorganic ion transport and metabolism	KO:K01534===zntA===Cd2+/Zn2+-exporting ATPase [EC:3.6.3.3 3.6.3.5]	1.91323
Ga0077592_1073233	emrB_4	drug resistance transporter, EmrB/QacA subfamily				0	1.91512
Ga0077592_101365	Ga0077592_101365	hypothetical protein				0	1.91522
Ga0077592_112813	Ga0077592_112813	Cytosine/adenosine deaminase	COG0402	[R]	General function prediction only	0	1.91933
Ga0077592_110994	rpsS	SSU ribosomal protein S19P	COG0185	[J]	Translation, ribosomal structure and biogenesis	KO:K02965===RP-S19, rpsS===small subunit ribosomal protein S19	1.9202
Ga0077592_1073385	Ga0077592_1073385	hypothetical protein				0	1.92033
Ga0077592_107281	Ga0077592_107281	hypothetical protein				0	1.92895
Ga0077592_10364	paaB	ring-1,2-phenylacetyl-CoA epoxidase subunit PaaB	COG3460	[Q]	Secondary metabolites biosynthesis, transport, and catabolism	KO:K02610===paaB===ring-1,2-phenylacetyl-CoA epoxidase subunit PaaB	1.93035
Ga0077592_1045203	Ga0077592_1045203	3-phenylpropionate/trans-cinnamate dioxygenase ferredoxin subunit	COG2146	[P]	Inorganic ion transport and metabolism	KO:K05710===hcaC===3-phenylpropionate/trans-cinnamate dioxygenase ferredoxin subunit	1.94391
Ga0077592_101055	Ga0077592_101055	malonate decarboxylase gamma subunit				KO:K13933===mdcE===malonate decarboxylase gamma subunit [EC:4.1.1.87]	1.9447
Ga0077592_10649	Ga0077592_10649	putative spermidine/putrescine transport system ATP-binding protein	COG3842	[E]	Amino acid transport and metabolism	KO:K02052===ABC.SP.A===putative spermidine/putrescine transport system ATP-binding protein	1.94855
Ga0077592_109293	Ga0077592_109293	arsenite transporter, ACR3 family	COG0798	[P]	Inorganic ion transport and metabolism	KO:K03325===TC.ACR3===arsenite transporter, ACR3 family	1.95255
Ga0077592_1084212	Ga0077592_1084212	porin, GBP family	COG3203	[M]	Cell wall/membrane/envelope biogenesis	KO:K03285===TC.GBP===general bacterial porin, GBP family	1.95357
Ga0077592_1097125	iclR_14	DNA-binding transcriptional regulator, IclR family	COG1414	[K]	Transcription	0	1.95407
Ga0077592_1097123	Ga0077592_1097123	cobaltochelatase CobS subunit	COG0714	[R]	General function prediction only	KO:K09882===cobS===cobaltochelatase CobS [EC:6.6.1.2]	1.95471
Ga0077592_114082	Ga0077592_114082	Membrane protein implicated in regulation of membrane protease activity	COG1585	[O]	Post-translational modification, protein turnover, and chaperones	0	1.95906
Ga0077592_10844	Ga0077592_10844	Cu+-exporting ATPase	COG2217	[P]	Inorganic ion transport and metabolism	KO:K17686===copA, ATP7===Cu+-exporting ATPase [EC:3.6.3.54]	1.9598
Ga0077592_1097127	Ga0077592_1097127	phosphotransacetylase	COG0280	[C]	Energy production and conversion	KO:K00625===E2.3.1.8, pta===phosphate acetyltransferase [EC:2.3.1.8]	1.96394
Ga0077592_1092103	Ga0077592_1092103	mercuric ion transport protein				KO:K19058===merC===mercuric ion transport protein	1.97161
Ga0077592_113486	nodT_6	efflux transporter, outer membrane factor (OMF) lipoprotein, NodT family	COG1538	[M]	Cell wall/membrane/envelope biogenesis	0	1.97895
Ga0077592_1140105	Ga0077592_1140105	2-oxo-4-hydroxy-4-carboxy-5-ureidoimidazoline decarboxylase	COG3195	[F]	Nucleotide transport and metabolism	KO:K13485===PRHOXNB, URAD===2-oxo-4-hydroxy-4-carboxy-5-ureidoimidazoline decarboxylase [EC:4.1.1.97]	1.98182
Ga0077592_109781	Ga0077592_109781	3-oxoacyl-[acyl-carrier protein] reductase	COG1028	[R]	General function prediction only	KO:K00059===fabG===3-oxoacyl-[acyl-carrier protein] reductase [EC:1.1.1.100]	1.99341
Ga0077592_107327	Ga0077592_107327	outer membrane protein, multidrug efflux system	COG1538	[M]	Cell wall/membrane/envelope biogenesis	KO:K18139===oprM, emhC, ttgC, cusC, adeK, smeF, mtrE, cmeC, gesC===outer membrane protein, multidrug efflux system	2.00491
Ga0077592_115495	iclR_19	DNA-binding transcriptional regulator, IclR family	COG1414	[K]	Transcription	0	2.01293
Ga0077592_10423	gcl	tartronate-semialdehyde synthase	COG3960	[Q]	Secondary metabolites biosynthesis, transport, and catabolism	KO:K01608===gcl===tartronate-semialdehyde synthase [EC:4.1.1.47]	2.01426
Ga0077592_108591	Ga0077592_108591	regulatory protein, tetR family				0	2.0144
Ga0077592_105847	Ga0077592_105847	hypothetical protein				0	2.02487
Ga0077592_10141	Ga0077592_10141	Integrase core domain-containing protein				KO:K07497===K07497===putative transposase	2.02642
Ga0077592_10362	Ga0077592_10362	ring-1,2-phenylacetyl-CoA epoxidase subunit PaaD	COG2151	[O]	Post-translational modification, protein turnover, and chaperones	KO:K02612===paaD===ring-1,2-phenylacetyl-CoA epoxidase subunit PaaD	2.02909
Ga0077592_10151	Ga0077592_10151	ring-1,2-phenylacetyl-CoA epoxidase subunit PaaA				KO:K02609===paaA===ring-1,2-phenylacetyl-CoA epoxidase subunit PaaA [EC:1.14.13.149]	2.0356
Ga0077592_106418	Ga0077592_106418	peptide/nickel transport system substrate-binding protein	COG0747	[E]	Amino acid transport and metabolism	KO:K02035===ABC.PE.S===peptide/nickel transport system substrate-binding protein	2.0436
Ga0077592_1097237	phnM	alpha-D-ribose 1-methylphosphonate 5-triphosphate diphosphatase	COG3454	[P]	Inorganic ion transport and metabolism	KO:K06162===phnM===alpha-D-ribose 1-methylphosphonate 5-triphosphate diphosphatase [EC:3.6.1.63]	2.04509
Ga0077592_1045291	Ga0077592_1045291	Predicted arabinose efflux permease, MFS family	COG2814	[G]	Carbohydrate transport and metabolism	0	2.05886
Ga0077592_110992	rpsC	SSU ribosomal protein S3P	COG0092	[J]	Translation, ribosomal structure and biogenesis	KO:K02982===RP-S3, rpsC===small subunit ribosomal protein S3	2.06263
Ga0077592_111570	Ga0077592_111570	putative MFS transporter, AGZA family, xanthine/uracil permease	COG2252	[F]	Nucleotide transport and metabolism	KO:K06901===pbuG===putative MFS transporter, AGZA family, xanthine/uracil permease	2.06398
Ga0077592_1073358	Ga0077592_1073358	Protein of unknown function (DUF3567)				0	2.06504
Ga0077592_1097281	Ga0077592_1097281	HlyD family secretion protein				KO:K01993===ABC-2.TX===HlyD family secretion protein	2.0661
Ga0077592_109290	Ga0077592_109290	DNA-binding transcriptional regulator, ArsR family	COG0640	[K]	Transcription	0	2.07496
Ga0077592_105860	Ga0077592_105860	aromatic amino acid aminotransferase apoenzyme	COG1448	[E]	Amino acid transport and metabolism	KO:K00832===tyrB===aromatic-amino-acid transaminase [EC:2.6.1.57]	2.0783
Ga0077592_1032221	Ga0077592_1032221	Pimeloyl-ACP methyl ester carboxylesterase	COG0596	[H]	Coenzyme transport and metabolism	0	2.08294
Ga0077592_109825	Ga0077592_109825	High potential iron-sulfur protein				0	2.09409
Ga0077592_108240	Ga0077592_108240	Uncharacterized membrane protein	COG3817	[S]	Function unknown	0	2.10167
Ga0077592_1003189	Ga0077592_1003189	N-carbamoyl-L-amino-acid hydrolase	COG0624	[E]	Amino acid transport and metabolism	KO:K06016===E3.5.1.87===N-carbamoyl-L-amino-acid hydrolase [EC:3.5.1.87]	2.11543
Ga0077592_109647	Ga0077592_109647	hypothetical protein				0	2.12444
Ga0077592_10235	Ga0077592_10235	hypothetical protein				0	2.15468
Ga0077592_1032214	glyA1	serine hydroxymethyltransferase	COG0112	[E]	Amino acid transport and metabolism	KO:K00600===glyA, SHMT===glycine hydroxymethyltransferase [EC:2.1.2.1]	2.16926
Ga0077592_101367	Ga0077592_101367	glycine betaine/proline transport system permease protein	COG4176	[E]	Amino acid transport and metabolism	KO:K02001===proW===glycine betaine/proline transport system permease protein	2.16955
Ga0077592_114015	lysR_80	DNA-binding transcriptional regulator, LysR family	COG0583	[K]	Transcription	0	2.17322
Ga0077592_113462	Ga0077592_113462	Outer membrane protein (porin)	COG3203	[M]	Cell wall/membrane/envelope biogenesis	0	2.1734
Ga0077592_111591	Ga0077592_111591	cytochrome bd-I ubiquinol oxidase subunit 1 apoprotein	COG1271	[C]	Energy production and conversion	KO:K00425===cydA===cytochrome d ubiquinol oxidase subunit I [EC:1.10.3.-]	2.18457
Ga0077592_1043200	Ga0077592_1043200	L-fuconate dehydratase	COG4948	[M]	Cell wall/membrane/envelope biogenesis	KO:K18334===fucD===L-fuconate dehydratase [EC:4.2.1.68]	2.19753
Ga0077592_1092102	Ga0077592_1092102	mercuric ion binding protein	COG2608	[P]	Inorganic ion transport and metabolism	KO:K08364===merP===periplasmic mercuric ion binding protein	2.20595
Ga0077592_1032124	Ga0077592_1032124	aldehyde dehydrogenase (NAD+)	COG1012	[C]	Energy production and conversion	KO:K00128===E1.2.1.3===aldehyde dehydrogenase (NAD+) [EC:1.2.1.3]	2.21718
Ga0077592_101374	soxB2_1	sarcosine oxidase subunit beta	COG0665	[E]	Amino acid transport and metabolism	KO:K00303===soxB===sarcosine oxidase, subunit beta [EC:1.5.3.1]	2.22262
Ga0077592_1032147	Ga0077592_1032147	3-isopropylmalate dehydratase, large subunit	COG0065	[E]	Amino acid transport and metabolism	KO:K01703===leuC===3-isopropylmalate/(R)-2-methylmalate dehydratase large subunit [EC:4.2.1.33 4.2.1.35]	2.22759
Ga0077592_1045304	Ga0077592_1045304	monosaccharide ABC transporter membrane protein, CUT2 family	COG1172	[G]	Carbohydrate transport and metabolism	KO:K02057===ABC.SS.P===simple sugar transport system permease protein	2.22818
Ga0077592_107247	Ga0077592_107247	cytochrome bo3 quinol oxidase subunit 4	COG3125	[C]	Energy production and conversion	KO:K02300===cyoD===cytochrome o ubiquinol oxidase operon protein cyoD	2.22962
Ga0077592_1016137	Ga0077592_1016137	hypothetical protein				0	2.23366
Ga0077592_103726	Ga0077592_103726	Protein of unknown function (DUF3563)				0	2.24417
Ga0077592_10724	Ga0077592_10724	vanillate O-demethylase ferredoxin subunit				KO:K03863===vanB===vanillate O-demethylase ferredoxin subunit [EC:1.14.13.82]	2.24979
Ga0077592_10196	Ga0077592_10196	hypothetical protein				0	2.28701
Ga0077592_111214	Ga0077592_111214	Cd2+/Zn2+-exporting ATPase	COG2217	[P]	Inorganic ion transport and metabolism	KO:K01534===zntA===Cd2+/Zn2+-exporting ATPase [EC:3.6.3.3 3.6.3.5]	2.29384
Ga0077592_110990	rpmC	LSU ribosomal protein L29P	COG0255	[J]	Translation, ribosomal structure and biogenesis	KO:K02904===RP-L29, rpmC===large subunit ribosomal protein L29	2.29814
Ga0077592_11173	Ga0077592_11173	membrane dipeptidase	COG2355	[E]	Amino acid transport and metabolism	KO:K01273===DPEP===membrane dipeptidase [EC:3.4.13.19]	2.30161
Ga0077592_10597	Ga0077592_10597	hypothetical protein				0	2.30194
Ga0077592_1045328	Ga0077592_1045328	glucarate dehydratase	COG4948	[M]	Cell wall/membrane/envelope biogenesis	KO:K01706===gudD===glucarate dehydratase [EC:4.2.1.40]	2.32646
Ga0077592_1045173	Ga0077592_1045173	protein of unknown function (DUF4148)				0	2.32983
Ga0077592_1003193	Ga0077592_1003193	amino acid ABC transporter substrate-binding protein, PAAT family	COG0834	[E]	Amino acid transport and metabolism	KO:K02030===ABC.PA.S===polar amino acid transport system substrate-binding protein	2.33968
Ga0077592_1016239	Ga0077592_1016239	protein TonB				KO:K03832===tonB===periplasmic protein TonB	2.34657
Ga0077592_107330	tetR_7	transcriptional regulator, TetR family	COG1309	[K]	Transcription	KO:K03577===acrR, smeT===TetR/AcrR family transcriptional regulator, acrAB operon repressor	2.36516
Ga0077592_1134105	scoA	3-oxoacid CoA-transferase subunit A	COG1788	[I]	Lipid transport and metabolism	KO:K01028===E2.8.3.5A, scoA===3-oxoacid CoA-transferase subunit A [EC:2.8.3.5]	2.38473
Ga0077592_111711	Ga0077592_111711	glycine betaine/proline transport system substrate-binding protein	COG2113	[E]	Amino acid transport and metabolism	KO:K02002===proX===glycine betaine/proline transport system substrate-binding protein	2.38937
Ga0077592_100326	Ga0077592_100326	NRAMP (natural resistance-associated macrophage protein) metal ion transporters	COG1914	[P]	Inorganic ion transport and metabolism	0	2.3898
Ga0077592_1045436	Ga0077592_1045436	3-hydroxybutyrate dehydrogenase	COG1028	[R]	General function prediction only	KO:K00019===E1.1.1.30, bdh===3-hydroxybutyrate dehydrogenase [EC:1.1.1.30]	2.39648
Ga0077592_114018	Ga0077592_114018	3-oxoadipate CoA-transferase beta subunit	COG2057	[I]	Lipid transport and metabolism	KO:K01032===pcaJ===3-oxoadipate CoA-transferase, beta subunit [EC:2.8.3.6]	2.4114
Ga0077592_107627	Ga0077592_107627	Outer membrane protein (porin)	COG3203	[M]	Cell wall/membrane/envelope biogenesis	0	2.44321
Ga0077592_109291	Ga0077592_109291	hypothetical protein				0	2.44892
Ga0077592_1084209	Ga0077592_1084209	hypothetical protein				0	2.4516
Ga0077592_1073161	Ga0077592_1073161	cytochrome b561	COG3038	[C]	Energy production and conversion	KO:K12262===cybB===cytochrome b561	2.45248
Ga0077592_112132	lysR_69	DNA-binding transcriptional regulator, LysR family	COG0583	[K]	Transcription	0	2.46144
Ga0077592_112119	Ga0077592_112119	protein of unknown function (DUF3331)				0	2.48658
Ga0077592_107249	Ga0077592_107249	cytochrome bo3 quinol oxidase subunit 1 apoprotein	COG0843	[C]	Energy production and conversion	KO:K02298===cyoB===cytochrome o ubiquinol oxidase subunit I [EC:1.10.3.-]	2.49554
Ga0077592_1134106	scoB	3-oxoacid CoA-transferase subunit B	COG2057	[I]	Lipid transport and metabolism	KO:K01029===E2.8.3.5B, scoB===3-oxoacid CoA-transferase subunit B [EC:2.8.3.5]	2.50165
Ga0077592_1043183	flhD_1	flagellar transcriptional activator FlhD				KO:K02403===flhD===flagellar transcriptional activator FlhD	2.50302
Ga0077592_11174	Ga0077592_11174	V4R domain-containing protein				0	2.53971
Ga0077592_112612	Ga0077592_112612	L-serine ammonia-lyase	COG1760	[E]	Amino acid transport and metabolism	KO:K01752===E4.3.1.17, sdaA, sdaB, tdcG===L-serine dehydratase [EC:4.3.1.17]	2.56774
Ga0077592_114016	iclR_18	transcriptional regulator, IclR family	COG1414	[K]	Transcription	KO:K02624===pcaR===IclR family transcriptional regulator, pca regulon regulatory protein	2.57214
Ga0077592_106419	Ga0077592_106419	Glycine/D-amino acid oxidase (deaminating)	COG0665	[E]	Amino acid transport and metabolism	0	2.57744
Ga0077592_107615	Ga0077592_107615	IS66 Orf2 like protein				0	2.59909
Ga0077592_109292	Ga0077592_109292	arsenate reductase	COG0394	[T]	Signal transduction mechanisms	KO:K03741===ARSC2, arsC===arsenate reductase [EC:1.20.4.1]	2.60961
Ga0077592_108243	Ga0077592_108243	biotin-dependent carboxylase uncharacterized domain-containing protein	COG1984	[E]	Amino acid transport and metabolism	0	2.61128
Ga0077592_109637	Ga0077592_109637	Protein of unknown function (DUF1328)				0	2.61598
Ga0077592_1032148	Ga0077592_1032148	3-isopropylmalate dehydratase, small subunit	COG0066	[E]	Amino acid transport and metabolism	KO:K01704===leuD===3-isopropylmalate/(R)-2-methylmalate dehydratase small subunit [EC:4.2.1.33 4.2.1.35]	2.62569
Ga0077592_1037115	Ga0077592_1037115	Protein of unknown function (DUF2891)				0	2.66448
Ga0077592_107248	Ga0077592_107248	cytochrome bo3 quinol oxidase subunit 3	COG1845	[C]	Energy production and conversion	KO:K02299===cyoC===cytochrome o ubiquinol oxidase subunit III [EC:1.10.3.-]	2.69097
Ga0077592_1045514	Ga0077592_1045514	Cd2+/Zn2+-exporting ATPase	COG2217	[P]	Inorganic ion transport and metabolism	KO:K01534===zntA===Cd2+/Zn2+-exporting ATPase [EC:3.6.3.3 3.6.3.5]	2.71789
Ga0077592_1097230	gntR_19	transcriptional regulator, GntR family	COG2188	[K]	Transcription	KO:K02043===phnF===GntR family transcriptional regulator, phosphonate transport system regulatory protein	2.72512
Ga0077592_10923	Ga0077592_10923	hypothetical protein				0	2.73301
Ga0077592_10936	Ga0077592_10936	TIR domain-containing protein				0	2.73592
Ga0077592_111710	Ga0077592_111710	Ferredoxin-NADP reductase	COG1018	[C]	Energy production and conversion	0	2.75783
Ga0077592_104547	Ga0077592_104547	Ectoine hydroxylase-related dioxygenase, phytanoyl-CoA dioxygenase (PhyH) family	COG5285	[Q]	Secondary metabolites biosynthesis, transport, and catabolism	0	2.75848
Ga0077592_115450	Ga0077592_115450	xanthine dehydrogenase, molybdenum binding subunit apoprotein	COG4631	[F]	Nucleotide transport and metabolism	KO:K13482===xdhB===xanthine dehydrogenase large subunit [EC:1.17.1.4]	2.76753
Ga0077592_10234	Ga0077592_10234	hypothetical protein				0	2.78154
Ga0077592_1097234	phnJ	alpha-D-ribose 1-methylphosphonate 5-phosphate C-P lyase	COG3627	[P]	Inorganic ion transport and metabolism	KO:K06163===phnJ===alpha-D-ribose 1-methylphosphonate 5-phosphate C-P lyase [EC:4.7.1.1]	2.80121
Ga0077592_114017	pcaI	3-oxoadipate CoA-transferase alpha subunit	COG1788	[I]	Lipid transport and metabolism	KO:K01031===pcaI===3-oxoadipate CoA-transferase, alpha subunit [EC:2.8.3.6]	2.80691
Ga0077592_1097126	xsc	sulfoacetaldehyde acetyltransferase	COG0028	[E]	Amino acid transport and metabolism	KO:K03852===xsc===sulfoacetaldehyde acetyltransferase [EC:2.3.3.15]	2.84412
Ga0077592_1056144	Ga0077592_1056144	copper chaperone	COG2608	[P]	Inorganic ion transport and metabolism	KO:K07213===ATOX1, ATX1, copZ, golB===copper chaperone	2.84485
Ga0077592_1097169	lysR_60	DNA-binding transcriptional regulator, LysR family	COG0583	[K]	Transcription	0	2.8644
Ga0077592_11061	purU_2	formyltetrahydrofolate deformylase	COG0788	[F]	Nucleotide transport and metabolism	KO:K01433===purU===formyltetrahydrofolate deformylase [EC:3.5.1.10]	2.86872
Ga0077592_1097233	Ga0077592_1097233	alpha-D-ribose 1-methylphosphonate 5-triphosphate synthase subunit PhnI	COG3626	[P]	Inorganic ion transport and metabolism	KO:K06164===phnI===alpha-D-ribose 1-methylphosphonate 5-triphosphate synthase subunit PhnI [EC:2.7.8.37]	2.87001
Ga0077592_11176	Ga0077592_11176	Fe-S oxidoreductase	COG0247	[C]	Energy production and conversion	0	2.88556
Ga0077592_1097231	Ga0077592_1097231	alpha-D-ribose 1-methylphosphonate 5-triphosphate synthase subunit PhnG	COG3624	[P]	Inorganic ion transport and metabolism	KO:K06166===phnG===alpha-D-ribose 1-methylphosphonate 5-triphosphate synthase subunit PhnG [EC:2.7.8.37]	2.89155
Ga0077592_111592	Ga0077592_111592	cytochrome bd-I ubiquinol oxidase subunit 2 apoprotein	COG1294=	[C]	Energy production and conversion	KO:K00426===cydB===cytochrome d ubiquinol oxidase subunit II [EC:1.10.3.-]	2.8962
Ga0077592_11179	Ga0077592_11179	Rieske 2Fe-2S family protein	COG4638	[R]	General function prediction only	KO:K00479===K00479===Rieske 2Fe-2S family protein	2.92579
Ga0077592_10478	sdhB_1	succinate dehydrogenase subunit B	COG0479	[C]	Energy production and conversion	KO:K00240===sdhB, frdB===succinate dehydrogenase / fumarate reductase, iron-sulfur subunit [EC:1.3.5.1 1.3.5.4]	2.94522
Ga0077592_1115202	Ga0077592_1115202	hypothetical protein				0	2.94932
Ga0077592_108244	Ga0077592_108244	sensor histidine kinase inhibitor, KipI family	COG2049	[E]	Amino acid transport and metabolism	0	2.95152
Ga0077592_106420	Ga0077592_106420	2-haloacid dehalogenase	COG1011	[H]	Coenzyme transport and metabolism	KO:K01560===E3.8.1.2===2-haloacid dehalogenase [EC:3.8.1.2]	2.96226
Ga0077592_111215	Ga0077592_111215	hypothetical protein				0	2.97274
Ga0077592_11175	stcD	2,4-dienoyl-CoA reductase	COG1902	[C]	Energy production and conversion	0	2.99409
Ga0077592_1097232	phnH	alpha-D-ribose 1-methylphosphonate 5-triphosphate synthase subunit PhnH	COG3625	[P]	Inorganic ion transport and metabolism	KO:K06165===phnH===alpha-D-ribose 1-methylphosphonate 5-triphosphate synthase subunit PhnH [EC:2.7.8.37]	2.99776
Ga0077592_10719	Ga0077592_10719	hypothetical protein				0	3.00483
Ga0077592_107616	Ga0077592_107616	Sugar-specific transcriptional regulator TrmB	COG1378	[K]	Transcription	0	3.00637
Ga0077592_113487	lysR_78	DNA-binding transcriptional regulator, LysR family	COG0583	[K]	Transcription	0	3.01529
Ga0077592_11178	Ga0077592_11178	electron transfer flavoprotein beta subunit	COG2086	[C]	Energy production and conversion	KO:K03521===fixA, etfB===electron transfer flavoprotein beta subunit	3.01753
Ga0077592_115451	Ga0077592_115451	xanthine dehydrogenase small subunit	COG4630	[F]	Nucleotide transport and metabolism	KO:K13481===xdhA===xanthine dehydrogenase small subunit [EC:1.17.1.4]	3.0328
Ga0077592_108524	Ga0077592_108524	3-oxoacyl-[acyl-carrier protein] reductase	COG1028	[R]	General function prediction only	KO:K00059===fabG===3-oxoacyl-[acyl-carrier protein] reductase [EC:1.1.1.100]	3.03348
Ga0077592_10252	Ga0077592_10252	Transcriptional regulator containing PAS, AAA-type ATPase, and DNA-binding Fis domains	COG3829	[T]	Signal transduction mechanisms	0	3.03868
Ga0077592_107628	Ga0077592_107628	hypothetical protein	COG3360	[R]	General function prediction only	KO:K09165===K09165===uncharacterized protein	3.04658
Ga0077592_112843	Ga0077592_112843	Adenosylmethionine-8-amino-7-oxononanoate aminotransferase	COG0161	[H]	Coenzyme transport and metabolism	0	3.08688
Ga0077592_106578	emrB_3	MFS transporter, DHA2 family, multidrug resistance protein				KO:K03446===emrB===MFS transporter, DHA2 family, multidrug resistance protein	3.1014
Ga0077592_104118	Ga0077592_104118	Aromatic ring-opening dioxygenase, catalytic subunit, LigB family	COG3384	[Q]	Secondary metabolites biosynthesis, transport, and catabolism	KO:K15777===DOPA===4,5-DOPA dioxygenase extradiol [EC:1.13.11.-]	3.1148
Ga0077592_105881	Ga0077592_105881	hypothetical protein	COG1028	[R]	General function prediction only	KO:K00100===E1.1.1.-===	3.13696
Ga0077592_1016125	ompC_1	Outer membrane protein (porin)	COG3203	[M]	Cell wall/membrane/envelope biogenesis	0	3.14662
Ga0077592_1097235	phnK	putative phosphonate transport system ATP-binding protein	COG4107	[P]	Inorganic ion transport and metabolism	KO:K05781===phnK===putative phosphonate transport system ATP-binding protein	3.14771
Ga0077592_1056105	Ga0077592_1056105	MFS transporter, DHA2 family, multidrug resistance protein				KO:K03446===emrB===MFS transporter, DHA2 family, multidrug resistance protein	3.14883
Ga0077592_112133	Ga0077592_112133	Uncharacterized membrane protein YccC	COG1289	[S]	Function unknown	0	3.17647
Ga0077592_1043160	Ga0077592_1043160	Nucleoside-diphosphate-sugar epimerase	COG0451	[M]	Cell wall/membrane/envelope biogenesis	0	3.17987
Ga0077592_1097168	Ga0077592_1097168	AraC family transcriptional regulator	COG2207	[K]	Transcription	KO:K07506===K07506===AraC family transcriptional regulator	3.24804
Ga0077592_11233	Ga0077592_11233	protein of unknown function (DUF4148)				0	3.26738
Ga0077592_1097236	Ga0077592_1097236	alpha-D-ribose 1-methylphosphonate 5-triphosphate synthase subunit PhnL	COG4778	[P]	Inorganic ion transport and metabolism	KO:K05780===phnL===alpha-D-ribose 1-methylphosphonate 5-triphosphate synthase subunit PhnL [EC:2.7.8.37]	3.28184
Ga0077592_106421	Ga0077592_106421	aldehyde dehydrogenase (NAD+)	COG1012	[C]	Energy production and conversion	KO:K00128===E1.2.1.3===aldehyde dehydrogenase (NAD+) [EC:1.2.1.3]	3.29835
Ga0077592_108242	lamB	UPF0271 protein	COG1540	[R]	General function prediction only	KO:K07160===K07160===UPF0271 protein	3.30732
Ga0077592_106577	Ga0077592_106577	DNA-binding transcriptional regulator, MarR family	COG1846	[K]	Transcription	0	3.31385
Ga0077592_103419	Ga0077592_103419	protein of unknown function (DUF4148)				0	3.45648
Ga0077592_111213	Ga0077592_111213	Double zinc ribbon				0	3.47904
Ga0077592_1056103	nodT_1	efflux transporter, outer membrane factor (OMF) lipoprotein, NodT family	COG1538	[M]	Cell wall/membrane/envelope biogenesis	0	3.63459
Ga0077592_1003269	Ga0077592_1003269	ectoine hydroxylase				KO:K10674===ectD===ectoine hydroxylase [EC:1.14.11.-]	3.65985
Ga0077592_115441	Ga0077592_115441	protein of unknown function (DUF4148)				0	3.69079
Ga0077592_11177	Ga0077592_11177	electron transfer flavoprotein alpha subunit apoprotein	COG2025	[C]	Energy production and conversion	KO:K03522===fixB, etfA===electron transfer flavoprotein alpha subunit	3.7606
Ga0077592_113433	Ga0077592_113433	hypothetical protein	COG1741	[R]	General function prediction only	KO:K06911===K06911===uncharacterized protein	3.86729
Ga0077592_1056104	Ga0077592_1056104	membrane fusion protein, multidrug efflux system	COG1566	[V]	Defense mechanisms	KO:K03543===emrA===membrane fusion protein, multidrug efflux system	3.9527
Ga0077592_113613	Ga0077592_113613	hypothetical protein				0	4.16837
Ga0077592_1056102	marR_4	DNA-binding transcriptional regulator, MarR family	COG1846	[K]	Transcription	0	4.1758
Ga0077592_112134	Ga0077592_112134	succinyl-CoA:acetate CoA-transferase	COG0427	[C]	Energy production and conversion	KO:K18118===aarC, cat1===succinyl-CoA:acetate CoA-transferase [EC:2.8.3.18]	4.17782
Ga0077592_1072116	Ga0077592_1072116	protein of unknown function (DUF4148)				0	4.20831
Ga0077592_113614	Ga0077592_113614	dihydroneopterin aldolase	COG1539	[H]	Coenzyme transport and metabolism	KO:K01633===folB===dihydroneopterin aldolase [EC:4.1.2.25]	4.22246
Ga0077592_10477	sdhA_1	succinate dehydrogenase subunit A	COG1053	[C]	Energy production and conversion	KO:K00239===sdhA, frdA===succinate dehydrogenase / fumarate reductase, flavoprotein subunit [EC:1.3.5.1 1.3.5.4]	4.30205
Ga0077592_106576	Ga0077592_106576	hypothetical protein				0	4.37353
Ga0077592_1084152	Ga0077592_1084152	hypothetical protein	COG1741	[R]	General function prediction only	KO:K06911===K06911===uncharacterized protein	4.39309
Ga0077592_10255	Ga0077592_10255	protein of unknown function (DUF4148)				0	4.40151
Ga0077592_10475	Ga0077592_10475	succinate dehydrogenase subunit C	COG2009	[C]	Energy production and conversion	KO:K00241===sdhC, frdC===succinate dehydrogenase / fumarate reductase, cytochrome b subunit	4.43111
Ga0077592_107638	Ga0077592_107638	2-polyprenyl-6-methoxyphenol hydroxylase	COG0654	[H]	Coenzyme transport and metabolism	KO:K05712===mhpA===3-(3-hydroxy-phenyl)propionate hydroxylase [EC:1.14.13.127]	4.5137
Ga0077592_107619	Ga0077592_107619	CBS domain-containing membrane protein	COG3448	[T]	Signal transduction mechanisms	KO:K07168===K07168===CBS domain-containing membrane protein	4.55277
Ga0077592_107631	Ga0077592_107631	hydroxyquinol 1,2-dioxygenase	COG3485	[Q]	Secondary metabolites biosynthesis, transport, and catabolism	KO:K03381===catA===catechol 1,2-dioxygenase [EC:1.13.11.1]	4.58382
Ga0077592_107625	ttgV	DNA-binding transcriptional regulator, IclR family	COG1414	[K]	Transcription	0	4.64237
Ga0077592_101373	Ga0077592_101373	L-serine ammonia-lyase	COG1760	[E]	Amino acid transport and metabolism	KO:K01752===E4.3.1.17, sdaA, sdaB, tdcG===L-serine dehydratase [EC:4.3.1.17]	4.67013
Ga0077592_113615	Ga0077592_113615	sarcosine oxidase subunit gamma	COG4583	[E]	Amino acid transport and metabolism	KO:K00305===soxG===sarcosine oxidase, subunit gamma [EC:1.5.3.1]	4.68274
Ga0077592_107637	Ga0077592_107637	NAD(P)H dehydrogenase (quinone)	COG0655	[C]	Energy production and conversion	KO:K03809===wrbA===NAD(P)H dehydrogenase (quinone) [EC:1.6.5.2]	4.687
Ga0077592_1097160	Ga0077592_1097160	Alcohol dehydrogenase, class IV	COG1454	[C]	Energy production and conversion	0	4.70726
Ga0077592_107626	Ga0077592_107626	Predicted arabinose efflux permease, MFS family	COG2814	[G]	Carbohydrate transport and metabolism	0	4.71288
Ga0077592_1003267	Ga0077592_1003267	Predicted arabinose efflux permease, MFS family	COG2814	[G]	Carbohydrate transport and metabolism	0	4.72081
Ga0077592_107636	Ga0077592_107636	2-polyprenyl-6-methoxyphenol hydroxylase	COG0654	[H]	Coenzyme transport and metabolism	0	4.75159
Ga0077592_107633	Ga0077592_107633	Acyl-CoA reductase	COG1012	[C]	Energy production and conversion	0	4.75928
Ga0077592_113617	Ga0077592_113617	sarcosine oxidase subunit delta	COG4311	[E]	Amino acid transport and metabolism	KO:K00304===soxD===sarcosine oxidase, subunit delta [EC:1.5.3.1]	4.76308
Ga0077592_104347	Ga0077592_104347	hypothetical protein				0	4.83696
Ga0077592_1097158	Ga0077592_1097158	Ferredoxin subunit of nitrite reductase or a ring-hydroxylating dioxygenase	COG2146	[P]	Inorganic ion transport and metabolism	0	4.84134
Ga0077592_113618	soxB2_2	sarcosine oxidase subunit beta	COG0665	[E]	Amino acid transport and metabolism	KO:K00303===soxB===sarcosine oxidase, subunit beta [EC:1.5.3.1]	4.8781
Ga0077592_113616	Ga0077592_113616	sarcosine oxidase subunit alpha	COG0404	[E]	Amino acid transport and metabolism	KO:K00302===soxA===sarcosine oxidase, subunit alpha [EC:1.5.3.1]	4.94791
Ga0077592_107630	Ga0077592_107630	Ferredoxin subunit of nitrite reductase or a ring-hydroxylating dioxygenase	COG2146	[P]	Inorganic ion transport and metabolism	0	5.06432
Ga0077592_112815	lysR_75	DNA-binding transcriptional regulator, LysR family	COG0583	[K]	Transcription	0	5.08961
Ga0077592_107620	Ga0077592_107620	DNA-binding transcriptional regulator, AcrR family	COG1309	[K]	Transcription	0	5.11638
Ga0077592_104964	Ga0077592_104964	protein of unknown function (DUF4148)				0	5.13167
Ga0077592_113422	Ga0077592_113422	hypothetical protein				0	5.39034
Ga0077592_1097159	Ga0077592_1097159	hydroxyquinol 1,2-dioxygenase	COG3485	[Q]	Secondary metabolites biosynthesis, transport, and catabolism	KO:K03381===catA===catechol 1,2-dioxygenase [EC:1.13.11.1]	5.41457
Ga0077592_107632	Ga0077592_107632	Alcohol dehydrogenase, class IV	COG1454	[C]	Energy production and conversion	0	5.47541
Ga0077592_107634	Ga0077592_107634	hypothetical protein				0	5.65879
Ga0077592_107621	Ga0077592_107621	KUP system potassium uptake protein	COG3158	[P]	Inorganic ion transport and metabolism	KO:K03549===kup===KUP system potassium uptake protein	5.74476
Ga0077592_1097162	Ga0077592_1097162	hypothetical protein				0	5.86318
Ga0077592_107612	Ga0077592_107612	hypothetical protein	COG1741	[R]	General function prediction only	KO:K06911===K06911===uncharacterized protein	5.87343
Ga0077592_107635	Ga0077592_107635	hypothetical protein				0	5.95603
Ga0077592_1097161	Ga0077592_1097161	Acyl-CoA reductase	COG1012	[C]	Energy production and conversion	0	6.44586
Ga0077592_1115141	Ga0077592_1115141	hypothetical protein				0	6.52919
Ga0077592_1115140	Ga0077592_1115140	protein of unknown function (DUF4148)				0	6.92342
Ga0077592_1097163	Ga0077592_1097163	hypothetical protein				0	6.97106
Ga0077592_107622	nodT_2	efflux transporter, outer membrane factor (OMF) lipoprotein, NodT family	COG1538	[M]	Cell wall/membrane/envelope biogenesis	0	7.12669
Ga0077592_1115133	Ga0077592_1115133	hypothetical protein				0	7.43158
Ga0077592_10935	Ga0077592_10935	protein of unknown function (DUF4148)				0	8.16424
Ga0077592_107624	Ga0077592_107624	Major Facilitator Superfamily protein				KO:K03446===emrB===MFS transporter, DHA2 family, multidrug resistance protein	8.43632
Ga0077592_107623	hlyD_1	membrane fusion protein, multidrug efflux system	COG1566	[V]	Defense mechanisms	KO:K03543===emrA===membrane fusion protein, multidrug efflux system	8.91268
Ga0077592_112816	Ga0077592_112816	Predicted arabinose efflux permease, MFS family	COG2814	[G]	Carbohydrate transport and metabolism	0	9.05472
Ga0077592_104135	azoR	FMN-dependent NADH-azoreductase	COG1182	[C]	Energy production and conversion	KO:K01118===acpD, azoR===FMN-dependent NADH-azoreductase [EC:1.7.-.-]	9.11867
