# Supplementary material for: Transcriptional analysis reveals the metabolic state of Burkholderia zhejiangensis CEIB S4-3 during methyl parathion degradation
Source: PeerJ. 2019 Apr 24;7:e6822. doi: 10.7717/peerj.6822 (PMC6486813; doi:10.7717/peerj.6822)
Supplement: Supplemental Information 6 — For the determination of DEGs at the time 9 h with MP, a fold change analysis was carry out, the genes with differential expression profile were those that showed values of ±1.5 (p-value < 0.05). Data were used to construct Table 1 and Figs. 3–6. [file peerj-07-6822-s006.xlsx]

## Sheet: Time nine hours without MP
Table S6. DEGs at the time nine hours with MP
Locus_tag	Name	Function	COG	ID	Functional category	KO	log2 Fold Change
Ga0077592_112816	Ga0077592_112816	Predicted arabinose efflux permease, MFS family	COG2814	[G]	Carbohydrate transport and metabolism	0	-10.2662
Ga0077592_107623	hlyD_1	membrane fusion protein, multidrug efflux system	COG1566	[V]	Defense mechanisms	KO:K03543===emrA===membrane fusion protein, multidrug efflux system	-8.61022
Ga0077592_10935	Ga0077592_10935	protein of unknown function (DUF4148)				0	-8.073
Ga0077592_107624	Ga0077592_107624	Major Facilitator Superfamily protein				KO:K03446===emrB===MFS transporter, DHA2 family, multidrug resistance protein	-7.72402
Ga0077592_1115133	Ga0077592_1115133	hypothetical protein				0	-7.37735
Ga0077592_1115141	Ga0077592_1115141	hypothetical protein				0	-7.31652
Ga0077592_107630	Ga0077592_107630	Ferredoxin subunit of nitrite reductase or a ring-hydroxylating dioxygenase	COG2146	[P]	Inorganic ion transport and metabolism	0	-7.11183
Ga0077592_107632	Ga0077592_107632	Alcohol dehydrogenase, class IV	COG1454	[C]	Energy production and conversion	0	-6.66472
Ga0077592_107633	Ga0077592_107633	Acyl-CoA reductase	COG1012	[C]	Energy production and conversion	0	-6.63482
Ga0077592_107635	Ga0077592_107635	hypothetical protein				0	-6.49216
Ga0077592_107622	nodT_2	efflux transporter, outer membrane factor (OMF) lipoprotein, NodT family	COG1538	[M]	Cell wall/membrane/envelope biogenesis	0	-6.4267
Ga0077592_107631	Ga0077592_107631	hydroxyquinol 1,2-dioxygenase	COG3485	[Q]	Secondary metabolites biosynthesis, transport, and catabolism	KO:K03381===catA===catechol 1,2-dioxygenase [EC:1.13.11.1]	-6.40621
Ga0077592_107634	Ga0077592_107634	hypothetical protein				0	-6.33565
Ga0077592_1097162	Ga0077592_1097162	hypothetical protein				0	-6.22339
Ga0077592_104135	azoR	FMN-dependent NADH-azoreductase	COG1182	[C]	Energy production and conversion	KO:K01118===acpD, azoR===FMN-dependent NADH-azoreductase [EC:1.7.-.-]	-6.18939
Ga0077592_1097163	Ga0077592_1097163	hypothetical protein				0	-6.15459
Ga0077592_104964	Ga0077592_104964	protein of unknown function (DUF4148)				0	-6.08881
Ga0077592_1115140	Ga0077592_1115140	protein of unknown function (DUF4148)				0	-6.02223
Ga0077592_107612	Ga0077592_107612	hypothetical protein	COG1741	[R]	General function prediction only	KO:K06911===K06911===uncharacterized protein	-5.97867
Ga0077592_1097161	Ga0077592_1097161	Acyl-CoA reductase	COG1012	[C]	Energy production and conversion	0	-5.97576
Ga0077592_107637	Ga0077592_107637	NAD(P)H dehydrogenase (quinone)	COG0655	[C]	Energy production and conversion	KO:K03809===wrbA===NAD(P)H dehydrogenase (quinone) [EC:1.6.5.2]	-5.85338
Ga0077592_107621	Ga0077592_107621	KUP system potassium uptake protein	COG3158	[P]	Inorganic ion transport and metabolism	KO:K03549===kup===KUP system potassium uptake protein	-5.65018
Ga0077592_107636	Ga0077592_107636	2-polyprenyl-6-methoxyphenol hydroxylase	COG0654	[H]	Coenzyme transport and metabolism	0	-5.63078
Ga0077592_107638	Ga0077592_107638	2-polyprenyl-6-methoxyphenol hydroxylase	COG0654	[H]	Coenzyme transport and metabolism	KO:K05712===mhpA===3-(3-hydroxy-phenyl)propionate hydroxylase [EC:1.14.13.127]	-5.59153
Ga0077592_113618	soxB2_2	sarcosine oxidase subunit beta	COG0665	[E]	Amino acid transport and metabolism	KO:K00303===soxB===sarcosine oxidase, subunit beta [EC:1.5.3.1]	-5.50213
Ga0077592_113616	Ga0077592_113616	sarcosine oxidase subunit alpha	COG0404	[E]	Amino acid transport and metabolism	KO:K00302===soxA===sarcosine oxidase, subunit alpha [EC:1.5.3.1]	-5.46057
Ga0077592_113615	Ga0077592_113615	sarcosine oxidase subunit gamma	COG4583	[E]	Amino acid transport and metabolism	KO:K00305===soxG===sarcosine oxidase, subunit gamma [EC:1.5.3.1]	-5.40728
Ga0077592_1003267	Ga0077592_1003267	Predicted arabinose efflux permease, MFS family	COG2814	[G]	Carbohydrate transport and metabolism	0	-5.19565
Ga0077592_11177	Ga0077592_11177	electron transfer flavoprotein alpha subunit apoprotein	COG2025	[C]	Energy production and conversion	KO:K03522===fixB, etfA===electron transfer flavoprotein alpha subunit	-5.15303
Ga0077592_107628	Ga0077592_107628	hypothetical protein	COG3360	[R]	General function prediction only	KO:K09165===K09165===uncharacterized protein	-5.12345
Ga0077592_113614	Ga0077592_113614	dihydroneopterin aldolase	COG1539	[H]	Coenzyme transport and metabolism	KO:K01633===folB===dihydroneopterin aldolase [EC:4.1.2.25]	-4.87336
Ga0077592_10234	Ga0077592_10234	hypothetical protein				0	-4.86555
Ga0077592_101373	Ga0077592_101373	L-serine ammonia-lyase	COG1760	[E]	Amino acid transport and metabolism	KO:K01752===E4.3.1.17, sdaA, sdaB, tdcG===L-serine dehydratase [EC:4.3.1.17]	-4.81304
Ga0077592_115441	Ga0077592_115441	protein of unknown function (DUF4148)				0	-4.73972
Ga0077592_1097159	Ga0077592_1097159	hydroxyquinol 1,2-dioxygenase	COG3485	[Q]	Secondary metabolites biosynthesis, transport, and catabolism	KO:K03381===catA===catechol 1,2-dioxygenase [EC:1.13.11.1]	-4.70043
Ga0077592_1084152	Ga0077592_1084152	hypothetical protein	COG1741	[R]	General function prediction only	KO:K06911===K06911===uncharacterized protein	-4.68002
Ga0077592_107626	Ga0077592_107626	Predicted arabinose efflux permease, MFS family	COG2814	[G]	Carbohydrate transport and metabolism	0	-4.66249
Ga0077592_10478	sdhB_1	succinate dehydrogenase subunit B	COG0479	[C]	Energy production and conversion	KO:K00240===sdhB, frdB===succinate dehydrogenase / fumarate reductase, iron-sulfur subunit [EC:1.3.5.1 1.3.5.4]	-4.64811
Ga0077592_107619	Ga0077592_107619	CBS domain-containing membrane protein	COG3448	[T]	Signal transduction mechanisms	KO:K07168===K07168===CBS domain-containing membrane protein	-4.56859
Ga0077592_1016125	ompC_1	Outer membrane protein (porin)	COG3203	[M]	Cell wall/membrane/envelope biogenesis	0	-4.56769
Ga0077592_113617	Ga0077592_113617	sarcosine oxidase subunit delta	COG4311	[E]	Amino acid transport and metabolism	KO:K00304===soxD===sarcosine oxidase, subunit delta [EC:1.5.3.1]	-4.44067
Ga0077592_105881	Ga0077592_105881	hypothetical protein	COG1028	[R]	General function prediction only	KO:K00100===E1.1.1.-===	-4.41271
Ga0077592_10255	Ga0077592_10255	protein of unknown function (DUF4148)				0	-4.4001
Ga0077592_107620	Ga0077592_107620	DNA-binding transcriptional regulator, AcrR family	COG1309	[K]	Transcription	0	-4.33384
Ga0077592_111711	Ga0077592_111711	glycine betaine/proline transport system substrate-binding protein	COG2113	[E]	Amino acid transport and metabolism	KO:K02002===proX===glycine betaine/proline transport system substrate-binding protein	-4.30174
Ga0077592_1043160	Ga0077592_1043160	Nucleoside-diphosphate-sugar epimerase	COG0451	[M]	Cell wall/membrane/envelope biogenesis	0	-4.2775
Ga0077592_1003269	Ga0077592_1003269	ectoine hydroxylase				KO:K10674===ectD===ectoine hydroxylase [EC:1.14.11.-]	-4.26667
Ga0077592_106421	Ga0077592_106421	aldehyde dehydrogenase (NAD+)	COG1012	[C]	Energy production and conversion	KO:K00128===E1.2.1.3===aldehyde dehydrogenase (NAD+) [EC:1.2.1.3]	-4.24987
Ga0077592_103419	Ga0077592_103419	protein of unknown function (DUF4148)				0	-4.18799
Ga0077592_1097236	Ga0077592_1097236	alpha-D-ribose 1-methylphosphonate 5-triphosphate synthase subunit PhnL	COG4778	[P]	Inorganic ion transport and metabolism	KO:K05780===phnL===alpha-D-ribose 1-methylphosphonate 5-triphosphate synthase subunit PhnL [EC:2.7.8.37]	-4.12994
Ga0077592_107321	Ga0077592_107321	nucleobase:cation symporter-2, NCS2 family	COG2233	[F]	Nucleotide transport and metabolism	KO:K03458===TC.NCS2===nucleobase:cation symporter-2, NCS2 family	-4.12679
Ga0077592_112815	lysR_75	DNA-binding transcriptional regulator, LysR family	COG0583	[K]	Transcription	0	-4.09355
Ga0077592_113433	Ga0077592_113433	hypothetical protein	COG1741	[R]	General function prediction only	KO:K06911===K06911===uncharacterized protein	-4.08801
Ga0077592_111710	Ga0077592_111710	Ferredoxin-NADP reductase	COG1018	[C]	Energy production and conversion	0	-4.06619
Ga0077592_1097231	Ga0077592_1097231	alpha-D-ribose 1-methylphosphonate 5-triphosphate synthase subunit PhnG	COG3624	[P]	Inorganic ion transport and metabolism	KO:K06166===phnG===alpha-D-ribose 1-methylphosphonate 5-triphosphate synthase subunit PhnG [EC:2.7.8.37]	-4.06579
Ga0077592_1056144	Ga0077592_1056144	copper chaperone	COG2608	[P]	Inorganic ion transport and metabolism	KO:K07213===ATOX1, ATX1, copZ, golB===copper chaperone	-4.01831
Ga0077592_108524	Ga0077592_108524	3-oxoacyl-[acyl-carrier protein] reductase	COG1028	[R]	General function prediction only	KO:K00059===fabG===3-oxoacyl-[acyl-carrier protein] reductase [EC:1.1.1.100]	-4.01346
Ga0077592_11175	stcD	2,4-dienoyl-CoA reductase	COG1902	[C]	Energy production and conversion	0	-3.95576
Ga0077592_1097232	phnH	alpha-D-ribose 1-methylphosphonate 5-triphosphate synthase subunit PhnH	COG3625	[P]	Inorganic ion transport and metabolism	KO:K06165===phnH===alpha-D-ribose 1-methylphosphonate 5-triphosphate synthase subunit PhnH [EC:2.7.8.37]	-3.9463
Ga0077592_106420	Ga0077592_106420	2-haloacid dehalogenase	COG1011	[H]	Coenzyme transport and metabolism	KO:K01560===E3.8.1.2===2-haloacid dehalogenase [EC:3.8.1.2]	-3.93496
Ga0077592_11233	Ga0077592_11233	protein of unknown function (DUF4148)				0	-3.92181
Ga0077592_11178	Ga0077592_11178	electron transfer flavoprotein beta subunit	COG2086	[C]	Energy production and conversion	KO:K03521===fixA, etfB===electron transfer flavoprotein beta subunit	-3.91421
Ga0077592_1003361	16S_1					#N/A	-3.90521
Ga0077592_11176	Ga0077592_11176	Fe-S oxidoreductase	COG0247	[C]	Energy production and conversion	0	-3.89474
Ga0077592_10476	Ga0077592_10476	succinate dehydrogenase / fumarate reductase membrane anchor subunit	COG2142	[C]	Energy production and conversion	KO:K00242===sdhD, frdD===succinate dehydrogenase / fumarate reductase, membrane anchor subunit	-3.88003
Ga0077592_112843	Ga0077592_112843	Adenosylmethionine-8-amino-7-oxononanoate aminotransferase	COG0161	[H]	Coenzyme transport and metabolism	0	-3.87968
Ga0077592_1097158	Ga0077592_1097158	Ferredoxin subunit of nitrite reductase or a ring-hydroxylating dioxygenase	COG2146	[P]	Inorganic ion transport and metabolism	0	-3.87845
Ga0077592_1056104	Ga0077592_1056104	membrane fusion protein, multidrug efflux system	COG1566	[V]	Defense mechanisms	KO:K03543===emrA===membrane fusion protein, multidrug efflux system	-3.83916
Ga0077592_1134106	scoB	3-oxoacid CoA-transferase subunit B	COG2057	[I]	Lipid transport and metabolism	KO:K01029===E2.8.3.5B, scoB===3-oxoacid CoA-transferase subunit B [EC:2.8.3.5]	-3.80295
Ga0077592_1097233	Ga0077592_1097233	alpha-D-ribose 1-methylphosphonate 5-triphosphate synthase subunit PhnI	COG3626	[P]	Inorganic ion transport and metabolism	KO:K06164===phnI===alpha-D-ribose 1-methylphosphonate 5-triphosphate synthase subunit PhnI [EC:2.7.8.37]	-3.78613
Ga0077592_111213	Ga0077592_111213	Double zinc ribbon				0	-3.76085
Ga0077592_100328	acnB	aconitase	COG1049	[C]	Energy production and conversion	KO:K01682===acnB===aconitate hydratase 2 / 2-methylisocitrate dehydratase [EC:4.2.1.3 4.2.1.99]	-3.75754
Ga0077592_1072116	Ga0077592_1072116	protein of unknown function (DUF4148)				0	-3.74523
Ga0077592_106578	emrB_3	MFS transporter, DHA2 family, multidrug resistance protein				KO:K03446===emrB===MFS transporter, DHA2 family, multidrug resistance protein	-3.74193
Ga0077592_1097160	Ga0077592_1097160	Alcohol dehydrogenase, class IV	COG1454	[C]	Energy production and conversion	0	-3.73564
Ga0077592_107648	Ga0077592_107648	Stress responsive A/B Barrel Domain				0	-3.72679
Ga0077592_109825	Ga0077592_109825	High potential iron-sulfur protein				0	-3.72284
Ga0077592_10477	sdhA_1	succinate dehydrogenase subunit A	COG1053	[C]	Energy production and conversion	KO:K00239===sdhA, frdA===succinate dehydrogenase / fumarate reductase, flavoprotein subunit [EC:1.3.5.1 1.3.5.4]	-3.71136
Ga0077592_1097234	phnJ	alpha-D-ribose 1-methylphosphonate 5-phosphate C-P lyase	COG3627	[P]	Inorganic ion transport and metabolism	KO:K06163===phnJ===alpha-D-ribose 1-methylphosphonate 5-phosphate C-P lyase [EC:4.7.1.1]	-3.70053
Ga0077592_1092102	Ga0077592_1092102	mercuric ion binding protein	COG2608	[P]	Inorganic ion transport and metabolism	KO:K08364===merP===periplasmic mercuric ion binding protein	-3.69955
Ga0077592_111592	Ga0077592_111592	cytochrome bd-I ubiquinol oxidase subunit 2 apoprotein	COG1294	[C]	Energy production and conversion	KO:K00426===cydB===cytochrome d ubiquinol oxidase subunit II [EC:1.10.3.-]	-3.68263
Ga0077592_108242	lamB	UPF0271 protein	COG1540	[R]	General function prediction only	KO:K07160===K07160===UPF0271 protein	-3.66347
Ga0077592_1073421	Ga0077592_1073421	Outer membrane protein (porin)	COG3203	[M]	Cell wall/membrane/envelope biogenesis	0	-3.65916
Ga0077592_1056103	nodT_1	efflux transporter, outer membrane factor (OMF) lipoprotein, NodT family	COG1538	[M]	Cell wall/membrane/envelope biogenesis	0	-3.64518
Ga0077592_11179	Ga0077592_11179	Rieske 2Fe-2S family protein	COG4638	[R]	General function prediction only	KO:K00479===K00479===Rieske 2Fe-2S family protein	-3.63909
Ga0077592_1097235	phnK	putative phosphonate transport system ATP-binding protein	COG4107	[P]	Inorganic ion transport and metabolism	KO:K05781===phnK===putative phosphonate transport system ATP-binding protein	-3.63118
Ga0077592_1003364	23S_1					#N/A	-3.62427
Ga0077592_10536	Ga0077592_10536	6,7-dimethyl-8-ribityllumazine synthase	COG0054	[H]	Coenzyme transport and metabolism	KO:K00794===ribH, RIB4===6,7-dimethyl-8-ribityllumazine synthase [EC:2.5.1.78]	-3.56821
Ga0077592_1073233	emrB_4	drug resistance transporter, EmrB/QacA subfamily				0	-3.5245
Ga0077592_113422	Ga0077592_113422	hypothetical protein				0	-3.51747
Ga0077592_107613	Ga0077592_107613	methyl-accepting chemotaxis sensory transducer with Cache sensor	COG0840	[N]	Cell motility	KO:K03406===mcp===methyl-accepting chemotaxis protein	-3.50681
Ga0077592_110989	rpsQ	SSU ribosomal protein S17P	COG0186	[J]	Translation, ribosomal structure and biogenesis	KO:K02961===RP-S17, MRPS17, rpsQ===small subunit ribosomal protein S17	-3.50036
Ga0077592_101638	Ga0077592_101638	hypothetical protein				0	-3.49634
Ga0077592_1045437	Ga0077592_1045437	acetoacetate decarboxylase	COG4689	[Q]	Secondary metabolites biosynthesis, transport, and catabolism	KO:K01574===adc===acetoacetate decarboxylase [EC:4.1.1.4]	-3.48631
Ga0077592_105860	Ga0077592_105860	aromatic amino acid aminotransferase apoenzyme	COG1448	[E]	Amino acid transport and metabolism	KO:K00832===tyrB===aromatic-amino-acid transaminase [EC:2.6.1.57]	-3.47453
Ga0077592_106577	Ga0077592_106577	DNA-binding transcriptional regulator, MarR family	COG1846	[K]	Transcription	0	-3.44203
Ga0077592_102929	Ga0077592_102929	dihydroxyacetone kinase DhaL subunit				KO:K05879===dhaL===dihydroxyacetone kinase, C-terminal domain [EC:2.7.1.-]	-3.44084
Ga0077592_1084212	Ga0077592_1084212	porin, GBP family	COG3203	[M]	Cell wall/membrane/envelope biogenesis	KO:K03285===TC.GBP===general bacterial porin, GBP family	-3.41795
Ga0077592_1072118	Ga0077592_1072118	malonate-semialdehyde dehydrogenase (acetylating) / methylmalonate-semialdehyde dehydrogenase	COG1012	[C]	Energy production and conversion	KO:K00140===mmsA, iolA, ALDH6A1===malonate-semialdehyde dehydrogenase (acetylating) / methylmalonate-semialdehyde dehydrogenase [EC:1.2.1.18 1.2.1.27]	-3.41548
Ga0077592_106576	Ga0077592_106576	hypothetical protein				0	-3.41034
Ga0077592_1056105	Ga0077592_1056105	MFS transporter, DHA2 family, multidrug resistance protein				KO:K03446===emrB===MFS transporter, DHA2 family, multidrug resistance protein	-3.39905
Ga0077592_1092103	Ga0077592_1092103	mercuric ion transport protein				KO:K19058===merC===mercuric ion transport protein	-3.38848
Ga0077592_1072111	Ga0077592_1072111	Pimeloyl-ACP methyl ester carboxylesterase	COG0596	[H]	Coenzyme transport and metabolism	0	-3.34957
Ga0077592_1097230	gntR_19	transcriptional regulator, GntR family	COG2188	[K]	Transcription	KO:K02043===phnF===GntR family transcriptional regulator, phosphonate transport system regulatory protein	-3.27765
Ga0077592_112133	Ga0077592_112133	Uncharacterized membrane protein YccC	COG1289	[S]	Function unknown	0	-3.26527
Ga0077592_105644	Ga0077592_105644					#N/A	-3.25936
Ga0077592_1097126	xsc	sulfoacetaldehyde acetyltransferase	COG0028	[E]	Amino acid transport and metabolism	KO:K03852===xsc===sulfoacetaldehyde acetyltransferase [EC:2.3.3.15]	-3.2498
Ga0077592_106418	Ga0077592_106418	peptide/nickel transport system substrate-binding protein	COG0747	[E]	Amino acid transport and metabolism	KO:K02035===ABC.PE.S===peptide/nickel transport system substrate-binding protein	-3.24705
Ga0077592_1045436	Ga0077592_1045436	3-hydroxybutyrate dehydrogenase	COG1028	[R]	General function prediction only	KO:K00019===E1.1.1.30, bdh===3-hydroxybutyrate dehydrogenase [EC:1.1.1.30]	-3.23749
Ga0077592_1109108	rplJ	LSU ribosomal protein L10P	COG0244	[J]	Translation, ribosomal structure and biogenesis	KO:K02864===RP-L10, MRPL10, rplJ===large subunit ribosomal protein L10	-3.23259
Ga0077592_104528	Ga0077592_104528	NAD(P)H dehydrogenase (quinone)	COG2249	[R]	General function prediction only	KO:K00355===NQO1===NAD(P)H dehydrogenase (quinone) [EC:1.6.5.2]	-3.2101
Ga0077592_107625	ttgV	DNA-binding transcriptional regulator, IclR family	COG1414	[K]	Transcription	0	-3.15348
Ga0077592_1056102	marR_4	DNA-binding transcriptional regulator, MarR family	COG1846	[K]	Transcription	0	-3.15146
Ga0077592_1043200	Ga0077592_1043200	L-fuconate dehydratase	COG4948	[M]	Cell wall/membrane/envelope biogenesis	KO:K18334===fucD===L-fuconate dehydratase [EC:4.2.1.68]	-3.1367
Ga0077592_10475	Ga0077592_10475	succinate dehydrogenase subunit C	COG2009	[C]	Energy production and conversion	KO:K00241===sdhC, frdC===succinate dehydrogenase / fumarate reductase, cytochrome b subunit	-3.13167
Ga0077592_115450	Ga0077592_115450	xanthine dehydrogenase, molybdenum binding subunit apoprotein	COG4631	[F]	Nucleotide transport and metabolism	KO:K13482===xdhB===xanthine dehydrogenase large subunit [EC:1.17.1.4]	-3.13045
Ga0077592_100326	Ga0077592_100326	NRAMP (natural resistance-associated macrophage protein) metal ion transporters	COG1914	[P]	Inorganic ion transport and metabolism	0	-3.12586
Ga0077592_1109107	rplL	LSU ribosomal protein L12P	COG0222	[J]	Translation, ribosomal structure and biogenesis	KO:K02935===RP-L7, MRPL12, rplL===large subunit ribosomal protein L7/L12	-3.12075
Ga0077592_104312	Ga0077592_104312	assimilatory nitrite reductase (NAD(P)H) small subunit	COG2146	[P]	Inorganic ion transport and metabolism	KO:K00363===nirD===nitrite reductase (NADH) small subunit [EC:1.7.1.15]	-3.10855
Ga0077592_11361	fdsA	glutathione-independent formaldehyde dehydrogenase	COG1063	[E]	Amino acid transport and metabolism	KO:K00148===fdhA===glutathione-independent formaldehyde dehydrogenase [EC:1.2.1.46]	-3.09703
Ga0077592_110991	rplP	LSU ribosomal protein L16P	COG0197	[J]	Translation, ribosomal structure and biogenesis	KO:K02878===RP-L16, MRPL16, rplP===large subunit ribosomal protein L16	-3.08316
Ga0077592_110979	rplO	LSU ribosomal protein L15P	COG0200	[J]	Translation, ribosomal structure and biogenesis	KO:K02876===RP-L15, MRPL15, rplO===large subunit ribosomal protein L15	-3.0749
Ga0077592_1003366	5S_1					#N/A	-3.07039
Ga0077592_111591	Ga0077592_111591	cytochrome bd-I ubiquinol oxidase subunit 1 apoprotein	COG1271	[C]	Energy production and conversion	KO:K00425===cydA===cytochrome d ubiquinol oxidase subunit I [EC:1.10.3.-]	-3.06531
Ga0077592_107248	Ga0077592_107248	cytochrome bo3 quinol oxidase subunit 3	COG1845	[C]	Energy production and conversion	KO:K02299===cyoC===cytochrome o ubiquinol oxidase subunit III [EC:1.10.3.-]	-3.05519
Ga0077592_108531	Ga0077592_108531	Outer membrane protein (porin)	COG3203	[M]	Cell wall/membrane/envelope biogenesis	0	-3.04981
Ga0077592_108243	Ga0077592_108243	biotin-dependent carboxylase uncharacterized domain-containing protein	COG1984	[E]	Amino acid transport and metabolism	0	-3.04518
Ga0077592_104547	Ga0077592_104547	Ectoine hydroxylase-related dioxygenase, phytanoyl-CoA dioxygenase (PhyH) family	COG5285	[Q]	Secondary metabolites biosynthesis, transport, and catabolism	0	-3.03378
Ga0077592_107327	Ga0077592_107327	outer membrane protein, multidrug efflux system	COG1538	[M]	Cell wall/membrane/envelope biogenesis	KO:K18139===oprM, emhC, ttgC, cusC, adeK, smeF, mtrE, cmeC, gesC===outer membrane protein, multidrug efflux system	-3.02866
Ga0077592_110990	rpmC	LSU ribosomal protein L29P	COG0255	[J]	Translation, ribosomal structure and biogenesis	KO:K02904===RP-L29, rpmC===large subunit ribosomal protein L29	-3.02473
Ga0077592_10719	Ga0077592_10719	hypothetical protein				0	-3.02349
Ga0077592_1109105	rpoC	DNA-directed RNA polymerase subunit beta'	COG0086	[K]	Transcription	KO:K03046===rpoC===DNA-directed RNA polymerase subunit beta' [EC:2.7.7.6]	-3.02005
Ga0077592_113447	Ga0077592_113447					#N/A	-3.0136
Ga0077592_115451	Ga0077592_115451	xanthine dehydrogenase small subunit	COG4630	[F]	Nucleotide transport and metabolism	KO:K13481===xdhA===xanthine dehydrogenase small subunit [EC:1.17.1.4]	-3.01112
Ga0077592_102935	Ga0077592_102935	carbohydrate ABC transporter substrate-binding protein, CUT1 family	COG1653	[G]	Carbohydrate transport and metabolism	KO:K02027===ABC.MS.S===multiple sugar transport system substrate-binding protein	-3.00712
Ga0077592_107247	Ga0077592_107247	cytochrome bo3 quinol oxidase subunit 4	COG3125	[C]	Energy production and conversion	KO:K02300===cyoD===cytochrome o ubiquinol oxidase operon protein cyoD	-3.00567
Ga0077592_110993	rplV	LSU ribosomal protein L22P	COG0091	[J]	Translation, ribosomal structure and biogenesis	KO:K02890===RP-L22, MRPL22, rplV===large subunit ribosomal protein L22	-3.004
Ga0077592_114082	Ga0077592_114082	Membrane protein implicated in regulation of membrane protease activity	COG1585	[O]	Post-translational modification, protein turnover, and chaperones	0	-2.99041
Ga0077592_102928	Ga0077592_102928	dihydroxyacetone kinase DhaK subunit	COG2376	[G]	Carbohydrate transport and metabolism	KO:K05878===dhaK===dihydroxyacetone kinase, N-terminal domain [EC:2.7.1.-]	-2.97243
Ga0077592_109292	Ga0077592_109292	arsenate reductase	COG0394	[T]	Signal transduction mechanisms	KO:K03741===ARSC2, arsC===arsenate reductase [EC:1.20.4.1]	-2.96627
Ga0077592_107240	Ga0077592_107240	hypothetical protein				0	-2.96239
Ga0077592_113613	Ga0077592_113613	hypothetical protein				0	-2.96118
Ga0077592_112134	Ga0077592_112134	succinyl-CoA:acetate CoA-transferase	COG0427	[C]	Energy production and conversion	KO:K18118===aarC, cat1===succinyl-CoA:acetate CoA-transferase [EC:2.8.3.18]	-2.95938
Ga0077592_101746	prkA	putative serine protein kinase, PrkA	COG2766	[T]	Signal transduction mechanisms	KO:K07180===prkA===serine protein kinase	-2.95872
Ga0077592_110511	Ga0077592_110511					#N/A	-2.95564
Ga0077592_107249	Ga0077592_107249	cytochrome bo3 quinol oxidase subunit 1 apoprotein	COG0843	[C]	Energy production and conversion	KO:K02298===cyoB===cytochrome o ubiquinol oxidase subunit I [EC:1.10.3.-]	-2.9457
Ga0077592_110980	rpmD	LSU ribosomal protein L30P	COG1841	[J]	Translation, ribosomal structure and biogenesis	KO:K02907===RP-L30, MRPL30, rpmD===large subunit ribosomal protein L30	-2.94553
Ga0077592_101060	Ga0077592_101060					#N/A	-2.9273
Ga0077592_1134105	scoA	3-oxoacid CoA-transferase subunit A	COG1788	[I]	Lipid transport and metabolism	KO:K01028===E2.8.3.5A, scoA===3-oxoacid CoA-transferase subunit A [EC:2.8.3.5]	-2.92592
Ga0077592_11311	23S_2					#N/A	-2.91666
Ga0077592_10423	gcl	tartronate-semialdehyde synthase	COG3960	[Q]	Secondary metabolites biosynthesis, transport, and catabolism	KO:K01608===gcl===tartronate-semialdehyde synthase [EC:4.1.1.47]	-2.91612
Ga0077592_110978	secY	protein translocase subunit secY/sec61 alpha	COG0201	[U]	Intracellular trafficking, secretion, and vesicular transport	KO:K03076===secY===preprotein translocase subunit SecY	-2.91491
Ga0077592_111934	Ga0077592_111934					#N/A	-2.91111
Ga0077592_110992	rpsC	SSU ribosomal protein S3P	COG0092	[J]	Translation, ribosomal structure and biogenesis	KO:K02982===RP-S3, rpsC===small subunit ribosomal protein S3	-2.90753
Ga0077592_115336	Ga0077592_115336	DNA-binding transcriptional regulator, ArsR family	COG0640	[K]	Transcription	0	-2.90026
Ga0077592_107627	Ga0077592_107627	Outer membrane protein (porin)	COG3203	[M]	Cell wall/membrane/envelope biogenesis	0	-2.90023
Ga0077592_104347	Ga0077592_104347	hypothetical protein				0	-2.89499
Ga0077592_104118	Ga0077592_104118	Aromatic ring-opening dioxygenase, catalytic subunit, LigB family	COG3384	[Q]	Secondary metabolites biosynthesis, transport, and catabolism	KO:K15777===DOPA===4,5-DOPA dioxygenase extradiol [EC:1.13.11.-]	-2.88891
Ga0077592_107259	Ga0077592_107259	Protein of unknown function (DUF3079)				0	-2.88147
Ga0077592_1118149	rplS	LSU ribosomal protein L19P	COG0335	[J]	Translation, ribosomal structure and biogenesis	KO:K02884===RP-L19, MRPL19, rplS===large subunit ribosomal protein L19	-2.88069
Ga0077592_1109109	rplA	LSU ribosomal protein L1P	COG0081	[J]	Translation, ribosomal structure and biogenesis	KO:K02863===RP-L1, MRPL1, rplA===large subunit ribosomal protein L1	-2.8775
Ga0077592_102931	Ga0077592_102931	carbohydrate ABC transporter ATP-binding protein, CUT1 family	COG3839	[G]	Carbohydrate transport and metabolism	KO:K10112===msmX, msmK, malK, sugC, ggtA, msiK===multiple sugar transport system ATP-binding protein	-2.87481
Ga0077592_110994	rpsS	SSU ribosomal protein S19P	COG0185	[J]	Translation, ribosomal structure and biogenesis	KO:K02965===RP-S19, rpsS===small subunit ribosomal protein S19	-2.86851
Ga0077592_10936	Ga0077592_10936	TIR domain-containing protein				0	-2.86232
Ga0077592_112612	Ga0077592_112612	L-serine ammonia-lyase	COG1760	[E]	Amino acid transport and metabolism	KO:K01752===E4.3.1.17, sdaA, sdaB, tdcG===L-serine dehydratase [EC:4.3.1.17]	-2.84839
Ga0077592_109291	Ga0077592_109291	hypothetical protein				0	-2.84092
Ga0077592_106419	Ga0077592_106419	Glycine/D-amino acid oxidase (deaminating)	COG0665	[E]	Amino acid transport and metabolism	0	-2.82507
Ga0077592_113462	Ga0077592_113462	Outer membrane protein (porin)	COG3203	[M]	Cell wall/membrane/envelope biogenesis	0	-2.81775
Ga0077592_110995	rplB	LSU ribosomal protein L2P	COG0090	[J]	Translation, ribosomal structure and biogenesis	KO:K02886===RP-L2, MRPL2, rplB===large subunit ribosomal protein L2	-2.81573
Ga0077592_110981	rpsE	SSU ribosomal protein S5P	COG0098	[J]	Translation, ribosomal structure and biogenesis	KO:K02988===RP-S5, MRPS5, rpsE===small subunit ribosomal protein S5	-2.80839
Ga0077592_1109110	rplK	LSU ribosomal protein L11P	COG0080	[J]	Translation, ribosomal structure and biogenesis	KO:K02867===RP-L11, MRPL11, rplK===large subunit ribosomal protein L11	-2.80089
Ga0077592_1045304	Ga0077592_1045304	monosaccharide ABC transporter membrane protein, CUT2 family	COG1172	[G]	Carbohydrate transport and metabolism	KO:K02057===ABC.SS.P===simple sugar transport system permease protein	-2.79781
Ga0077592_1097127	Ga0077592_1097127	phosphotransacetylase	COG0280	[C]	Energy production and conversion	KO:K00625===E2.3.1.8, pta===phosphate acetyltransferase [EC:2.3.1.8]	-2.79676
Ga0077592_110982	rplR	LSU ribosomal protein L18P	COG0256	[J]	Translation, ribosomal structure and biogenesis	KO:K02881===RP-L18, MRPL18, rplR===large subunit ribosomal protein L18	-2.78803
Ga0077592_1032124	Ga0077592_1032124	aldehyde dehydrogenase (NAD+)	COG1012	[C]	Energy production and conversion	KO:K00128===E1.2.1.3===aldehyde dehydrogenase (NAD+) [EC:1.2.1.3]	-2.77327
Ga0077592_10724	Ga0077592_10724	vanillate O-demethylase ferredoxin subunit				KO:K03863===vanB===vanillate O-demethylase ferredoxin subunit [EC:1.14.13.82]	-2.77097
Ga0077592_11174	Ga0077592_11174	V4R domain-containing protein				0	-2.77086
Ga0077592_109232	Ga0077592_109232	Cu and Ag efflux protein CusF	COG5569	[P]	Inorganic ion transport and metabolism	0	-2.76652
Ga0077592_102936	Ga0077592_102936	substrate-binding protein domain-containing protein				KO:K02529===lacI, galR===LacI family transcriptional regulator	-2.73912
Ga0077592_11061	purU_2	formyltetrahydrofolate deformylase	COG0788	[F]	Nucleotide transport and metabolism	KO:K01433===purU===formyltetrahydrofolate deformylase [EC:3.5.1.10]	-2.73511
Ga0077592_114083	Ga0077592_114083	Regulator of protease activity HflC, stomatin/prohibitin superfamily	COG0330	[O]	Post-translational modification, protein turnover, and chaperones	0	-2.73456
Ga0077592_100931	Ga0077592_100931	Uncharacterized conserved protein YbjT, contains NAD(P)-binding and DUF2867 domains	COG0702	[R]	General function prediction only	0	-2.73002
Ga0077592_114018	Ga0077592_114018	3-oxoadipate CoA-transferase beta subunit	COG2057	[I]	Lipid transport and metabolism	KO:K01032===pcaJ===3-oxoadipate CoA-transferase, beta subunit [EC:2.8.3.6]	-2.71841
Ga0077592_11173	Ga0077592_11173	membrane dipeptidase	COG2355	[E]	Amino acid transport and metabolism	KO:K01273===DPEP===membrane dipeptidase [EC:3.4.13.19]	-2.71609
Ga0077592_110977	infA2_2	bacterial translation initiation factor 1 (bIF-1)	COG0361	[J]	Translation, ribosomal structure and biogenesis	KO:K02518===infA===translation initiation factor IF-1	-2.70454
Ga0077592_104332	Ga0077592_104332	Nitrate/nitrite transporter NarK	COG2223	[P]	Inorganic ion transport and metabolism	0	-2.68588
Ga0077592_1073232	marR_7	DNA-binding transcriptional regulator, MarR family	COG1846	[K]	Transcription	0	-2.675
Ga0077592_110983	rplF	LSU ribosomal protein L6P	COG0097	[J]	Translation, ribosomal structure and biogenesis	KO:K02933===RP-L6, MRPL6, rplF===large subunit ribosomal protein L6	-2.66949
Ga0077592_11329	Ga0077592_11329	competence protein ComEA				KO:K02237===comEA===competence protein ComEA	-2.6633
Ga0077592_101367	Ga0077592_101367	glycine betaine/proline transport system permease protein	COG4176	[E]	Amino acid transport and metabolism	KO:K02001===proW===glycine betaine/proline transport system permease protein	-2.65012
Ga0077592_100627	Ga0077592_100627					#N/A	-2.63195
Ga0077592_107258	Ga0077592_107258	nitronate monooxygenase	COG2070	[R]	General function prediction only	KO:K00459===ncd2, npd===nitronate monooxygenase [EC:1.13.12.16]	-2.62691
Ga0077592_101055	Ga0077592_101055	malonate decarboxylase gamma subunit				KO:K13933===mdcE===malonate decarboxylase gamma subunit [EC:4.1.1.87]	-2.61868
Ga0077592_114017	pcaI	3-oxoadipate CoA-transferase alpha subunit	COG1788	[I]	Lipid transport and metabolism	KO:K01031===pcaI===3-oxoadipate CoA-transferase, alpha subunit [EC:2.8.3.6]	-2.60414
Ga0077592_110984	rpsH	SSU ribosomal protein S8P	COG0096	[J]	Translation, ribosomal structure and biogenesis	KO:K02994===RP-S8, rpsH===small subunit ribosomal protein S8	-2.60331
Ga0077592_109263	Ga0077592_109263	Transglycosylase SLT domain-containing protein				0	-2.6027
Ga0077592_113465	Ga0077592_113465					#N/A	-2.60215
Ga0077592_1003123	Ga0077592_1003123	Molecular chaperone IbpA, HSP20 family	COG0071	[O]	Post-translational modification, protein turnover, and chaperones	0	-2.5931
Ga0077592_104534	Ga0077592_104534	Outer membrane protein (porin)	COG3203	[M]	Cell wall/membrane/envelope biogenesis	0	-2.58573
Ga0077592_114033	Ga0077592_114033	Superfamily II DNA and RNA helicase	COG0513	[L]	Replication, recombination and repair	0	-2.58497
Ga0077592_1045435	Ga0077592_1045435	NTE family protein	COG1752	[R]	General function prediction only	KO:K07001===K07001===NTE family protein	-2.58429
Ga0077592_103732	amn	AMP nucleosidase	COG0775	[F]	Nucleotide transport and metabolism	KO:K01241===amn===AMP nucleosidase [EC:3.2.2.4]	-2.55463
Ga0077592_11497	Ga0077592_11497	IS66 Orf2 like protein				0	-2.54717
Ga0077592_1003193	Ga0077592_1003193	amino acid ABC transporter substrate-binding protein, PAAT family	COG0834	[E]	Amino acid transport and metabolism	KO:K02030===ABC.PA.S===polar amino acid transport system substrate-binding protein	-2.54513
Ga0077592_10725	Ga0077592_10725	Glycosyl hydrolase catalytic core				0	-2.53156
Ga0077592_10984	Ga0077592_10984	Protein N-acetyltransferase, RimJ/RimL family	COG1670	[O]	Post-translational modification, protein turnover, and chaperones	0	-2.52894
Ga0077592_1016251	Ga0077592_1016251	hypothetical protein				0	-2.5255
Ga0077592_112119	Ga0077592_112119	protein of unknown function (DUF3331)				0	-2.52511
Ga0077592_1003227	Ga0077592_1003227	sulfur acquisition oxidoreductase, SfnB family	COG1960	[I]	Lipid transport and metabolism	0	-2.52471
Ga0077592_109254	Ga0077592_109254	Type IV conjugative transfer system lipoprotein (TraV)				0	-2.51007
Ga0077592_1003122	Ga0077592_1003122	HSP20 family protein	COG0071	[O]	Post-translational modification, protein turnover, and chaperones	KO:K13993===HSP20===HSP20 family protein	-2.50264
Ga0077592_10792	Ga0077592_10792	Transposase	COG3547	[X]	Mobilome: prophages, transposons	0	-2.48205
Ga0077592_106427	Ga0077592_106427					#N/A	-2.46946
Ga0077592_111956	Ga0077592_111956					#N/A	-2.46757
Ga0077592_110988	rplN	LSU ribosomal protein L14P	COG0093	[J]	Translation, ribosomal structure and biogenesis	KO:K02874===RP-L14, MRPL14, rplN===large subunit ribosomal protein L14	-2.46549
Ga0077592_112822	iclA	isocitrate lyase	COG2224	[C]	Energy production and conversion	KO:K01637===E4.1.3.1, aceA===isocitrate lyase [EC:4.1.3.1]	-2.46239
Ga0077592_1109106	rpoB	DNA-directed RNA polymerase subunit beta				KO:K03043===rpoB===DNA-directed RNA polymerase subunit beta [EC:2.7.7.6]	-2.46228
Ga0077592_115439	groL1	chaperonin GroEL	COG0459	[O]	Post-translational modification, protein turnover, and chaperones	KO:K04077===groEL, HSPD1===chaperonin GroEL	-2.46044
Ga0077592_10741	Ga0077592_10741	Integrase core domain-containing protein				KO:K07497===K07497===putative transposase	-2.45279
Ga0077592_107328	Ga0077592_107328	multidrug efflux pump	COG0841	[V]	Defense mechanisms	KO:K18138===acrB, mexB, adeJ, smeE, mtrD, cmeB===multidrug efflux pump	-2.44566
Ga0077592_109239	Ga0077592_109239	Cu(I)-responsive transcriptional regulator	COG0789	[K]	Transcription	KO:K19591===cueR===MerR family transcriptional regulator, copper efflux regulator	-2.44514
Ga0077592_10649	Ga0077592_10649	putative spermidine/putrescine transport system ATP-binding protein	COG3842	[E]	Amino acid transport and metabolism	KO:K02052===ABC.SP.A===putative spermidine/putrescine transport system ATP-binding protein	-2.44238
Ga0077592_1109101	fusA	translation elongation factor 2 (EF-2/EF-G)	COG0480	[J]	Translation, ribosomal structure and biogenesis	KO:K02355===fusA, GFM, EFG===elongation factor G	-2.43999
Ga0077592_107121	Ga0077592_107121	hypothetical protein				0	-2.43332
Ga0077592_1056124	Ga0077592_1056124					#N/A	-2.42887
Ga0077592_11363	betB	betaine aldehyde dehydrogenase	COG1012	[C]	Energy production and conversion	KO:K00130===betB, gbsA===betaine-aldehyde dehydrogenase [EC:1.2.1.8]	-2.42767
Ga0077592_110986	rplE	LSU ribosomal protein L5P	COG0094	[J]	Translation, ribosomal structure and biogenesis	KO:K02931===RP-L5, MRPL5, rplE===large subunit ribosomal protein L5	-2.4243
Ga0077592_1109114	tufA1_2	translation elongation factor 1A (EF-1A/EF-Tu)	COG0050	[J]	Translation, ribosomal structure and biogenesis	KO:K02358===tuf, TUFM===elongation factor Tu	-2.42182
Ga0077592_102930	Ga0077592_102930	carbohydrate ABC transporter ATP-binding protein, CUT1 family	COG3839	[G]	Carbohydrate transport and metabolism	KO:K10112===msmX, msmK, malK, sugC, ggtA, msiK===multiple sugar transport system ATP-binding protein	-2.42023
Ga0077592_1109117	Ga0077592_1109117					#N/A	-2.41987
Ga0077592_111215	Ga0077592_111215	hypothetical protein				0	-2.41812
Ga0077592_106524	atpA1	ATP synthase F1 subcomplex alpha subunit	COG0056	[C]	Energy production and conversion	KO:K02111===ATPF1A, atpA===F-type H+-transporting ATPase subunit alpha [EC:3.6.3.14]	-2.41536
Ga0077592_1109112	secE	protein translocase subunit secE/sec61 gamma	COG0690	[U]	Intracellular trafficking, secretion, and vesicular transport	KO:K03073===secE===preprotein translocase subunit SecE	-2.40888
Ga0077592_107647	Ga0077592_107647	RNA-directed DNA polymerase				KO:K00986===E2.7.7.49===RNA-directed DNA polymerase [EC:2.7.7.49]	-2.40611
Ga0077592_10141	Ga0077592_10141	Integrase core domain-containing protein				KO:K07497===K07497===putative transposase	-2.40525
Ga0077592_110996	rplW	LSU ribosomal protein L23P	COG0089	[J]	Translation, ribosomal structure and biogenesis	KO:K02892===RP-L23, MRPL23, rplW===large subunit ribosomal protein L23	-2.40429
Ga0077592_105816	Ga0077592_105816	Formyl transferase				0	-2.40421
Ga0077592_103726	Ga0077592_103726	Protein of unknown function (DUF3563)				0	-2.40255
Ga0077592_106415	Ga0077592_106415	peptide/nickel transport system ATP-binding protein	COG1123	[O]	Post-translational modification, protein turnover, and chaperones	KO:K02032===ABC.PE.A1===peptide/nickel transport system ATP-binding protein	-2.39871
Ga0077592_110997	rplD	LSU ribosomal protein L4P	COG0088	[J]	Translation, ribosomal structure and biogenesis	KO:K02926===RP-L4, MRPL4, rplD===large subunit ribosomal protein L4	-2.39796
Ga0077592_106521	atpC	ATP synthase F1 subcomplex epsilon subunit	COG0355	[C]	Energy production and conversion	KO:K02114===ATPF1E, atpC===F-type H+-transporting ATPase subunit epsilon	-2.39582
Ga0077592_1097237	phnM	alpha-D-ribose 1-methylphosphonate 5-triphosphate diphosphatase	COG3454	[P]	Inorganic ion transport and metabolism	KO:K06162===phnM===alpha-D-ribose 1-methylphosphonate 5-triphosphate diphosphatase [EC:3.6.1.63]	-2.39509
Ga0077592_1097278	Ga0077592_1097278	efflux transporter, outer membrane factor (OMF) lipoprotein, NodT family	COG1538	[M]	Cell wall/membrane/envelope biogenesis	0	-2.39419
Ga0077592_1073405	Ga0077592_1073405	Ubiquinone biosynthesis hydroxylase, UbiH/UbiF/VisC/COQ6 family	COG0654	[H]	Coenzyme transport and metabolism	0	-2.3905
Ga0077592_101053	Ga0077592_101053	malonate decarboxylase delta subunit				KO:K13931===mdcC===malonate decarboxylase delta subunit	-2.38434
Ga0077592_1097272	Ga0077592_1097272	monosaccharide ABC transporter substrate-binding protein, CUT2 family	COG1879	[G]	Carbohydrate transport and metabolism	KO:K10439===rbsB===ribose transport system substrate-binding protein	-2.38232
Ga0077592_1097281	Ga0077592_1097281	HlyD family secretion protein				KO:K01993===ABC-2.TX===HlyD family secretion protein	-2.38099
Ga0077592_1003352	Ga0077592_1003352	hypothetical protein				0	-2.37544
Ga0077592_111570	Ga0077592_111570	putative MFS transporter, AGZA family, xanthine/uracil permease	COG2252	[F]	Nucleotide transport and metabolism	KO:K06901===pbuG===putative MFS transporter, AGZA family, xanthine/uracil permease	-2.37071
Ga0077592_106522	atpD2	ATP synthase F1 subcomplex beta subunit	COG0055	[C]	Energy production and conversion	KO:K02112===ATPF1B, atpD===F-type H+-transporting ATPase subunit beta [EC:3.6.3.14]	-2.36946
Ga0077592_1084209	Ga0077592_1084209	hypothetical protein				0	-2.36521
Ga0077592_11364	betA	choline dehydrogenase	COG2303	[R]	General function prediction only	KO:K00108===betA, CHDH===choline dehydrogenase [EC:1.1.99.1]	-2.3639
Ga0077592_10252	Ga0077592_10252	Transcriptional regulator containing PAS, AAA-type ATPase, and DNA-binding Fis domains	COG3829	[T]	Signal transduction mechanisms	0	-2.3609
Ga0077592_106523	atpG	F-type H+-transporting ATPase subunit gamma	COG0224	[C]	Energy production and conversion	KO:K02115===ATPF1G, atpG===F-type H+-transporting ATPase subunit gamma	-2.35873
Ga0077592_108228	Ga0077592_108228	holin-like protein	COG1380	[R]	General function prediction only	KO:K06518===cidA===holin-like protein	-2.35608
Ga0077592_1097168	Ga0077592_1097168	AraC family transcriptional regulator	COG2207	[K]	Transcription	KO:K07506===K07506===AraC family transcriptional regulator	-2.34957
Ga0077592_1012128	dctM_1	TRAP transporter, DctM subunit	COG1593	[G]	Carbohydrate transport and metabolism	0	-2.34065
Ga0077592_1045328	Ga0077592_1045328	glucarate dehydratase	COG4948	[M]	Cell wall/membrane/envelope biogenesis	KO:K01706===gudD===glucarate dehydratase [EC:4.2.1.40]	-2.34026
Ga0077592_109627	Ga0077592_109627	MFS transporter, MHS family, proline/betaine transporter	COG2814	[G]	Carbohydrate transport and metabolism	KO:K03762===proP===MFS transporter, MHS family, proline/betaine transporter	-2.33489
Ga0077592_103798	sucC_1	succinyl-CoA synthetase (ADP-forming) beta subunit	COG0045	[C]	Energy production and conversion	KO:K01903===sucC===succinyl-CoA synthetase beta subunit [EC:6.2.1.5]	-2.3344
Ga0077592_1045519	Ga0077592_1045519	DNA-binding transcriptional regulator, LysR family	COG0583	[K]	Transcription	0	-2.33439
Ga0077592_10426	priB	restart primosome assembly protein PriB	COG2965	[L]	Replication, recombination and repair	KO:K02686===priB===primosomal replication protein N	-2.33246
Ga0077592_101032	Ga0077592_101032					#N/A	-2.32845
Ga0077592_110985	rpsN	SSU ribosomal protein S14P	COG0199	[J]	Translation, ribosomal structure and biogenesis	KO:K02954===RP-S14, MRPS14, rpsN===small subunit ribosomal protein S14	-2.3267
Ga0077592_1043183	flhD_1	flagellar transcriptional activator FlhD				KO:K02403===flhD===flagellar transcriptional activator FlhD	-2.32595
Ga0077592_113232	Ga0077592_113232	formate dehydrogenase alpha subunit	COG3383	[R]	General function prediction only	KO:K00123===fdoG, fdfH===formate dehydrogenase major subunit [EC:1.2.1.2]	-2.31889
Ga0077592_10152	Ga0077592_10152	Sugar transporter				0	-2.31123
Ga0077592_103215	Ga0077592_103215	Nicotinamidase-related amidase	COG1335	[H]	Coenzyme transport and metabolism	0	-2.30833
Ga0077592_108231	ahcY	adenosylhomocysteinase	COG0499	[H]	Coenzyme transport and metabolism	KO:K01251===E3.3.1.1, ahcY===adenosylhomocysteinase [EC:3.3.1.1]	-2.30137
Ga0077592_1097169	lysR_60	DNA-binding transcriptional regulator, LysR family	COG0583	[K]	Transcription	0	-2.29737
Ga0077592_103274	Ga0077592_103274	oxalyl-CoA decarboxylase	COG0028	[E]	Amino acid transport and metabolism	KO:K01577===oxc===oxalyl-CoA decarboxylase [EC:4.1.1.8]	-2.29488
Ga0077592_113233	Ga0077592_113233	formate dehydrogenase delta subunit				KO:K00126===fdsD===formate dehydrogenase subunit delta [EC:1.2.1.2]	-2.28716
Ga0077592_1045173	Ga0077592_1045173	protein of unknown function (DUF4148)				0	-2.28694
Ga0077592_1084190	Ga0077592_1084190	oxygen-independent coproporphyrinogen-3 oxidase	COG0635	[H]	Coenzyme transport and metabolism	KO:K02495===hemN, hemZ===oxygen-independent coproporphyrinogen III oxidase [EC:1.3.99.22]	-2.28652
Ga0077592_111573	Ga0077592_111573	hypothetical protein				0	-2.28471
Ga0077592_1073438	Ga0077592_1073438	methyl-accepting chemotaxis protein	COG0840	[N]	Cell motility	KO:K03406===mcp===methyl-accepting chemotaxis protein	-2.28354
Ga0077592_1032147	Ga0077592_1032147	3-isopropylmalate dehydratase, large subunit	COG0065	[E]	Amino acid transport and metabolism	KO:K01703===leuC===3-isopropylmalate/(R)-2-methylmalate dehydratase large subunit [EC:4.2.1.33 4.2.1.35]	-2.28354
Ga0077592_108240	Ga0077592_108240	Uncharacterized membrane protein	COG3817	[S]	Function unknown	0	-2.27741
Ga0077592_100910	Ga0077592_100910	Nucleotide-binding universal stress protein, UspA family	COG0589	[T]	Signal transduction mechanisms	0	-2.27638
Ga0077592_108229	lrgB_2	TIGR00659 family protein	COG1346	[M]	Cell wall/membrane/envelope biogenesis	0	-2.27375
Ga0077592_1097123	Ga0077592_1097123	cobaltochelatase CobS subunit	COG0714	[R]	General function prediction only	KO:K09882===cobS===cobaltochelatase CobS [EC:6.6.1.2]	-2.27247
Ga0077592_109742	Ga0077592_109742	NitT/TauT family transport system substrate-binding protein	COG0715	[P]	Inorganic ion transport and metabolism	KO:K02051===ABC.SN.S===NitT/TauT family transport system substrate-binding protein	-2.26874
Ga0077592_1109111	nusG	transcription antitermination protein nusG	COG0250	[K]	Transcription	KO:K02601===nusG===transcriptional antiterminator NusG	-2.26632
Ga0077592_1073493	Ga0077592_1073493	ribonuclease P protein component	COG0594	[J]	Translation, ribosomal structure and biogenesis	KO:K03536===rnpA===ribonuclease P protein component [EC:3.1.26.5]	-2.26302
Ga0077592_1045303	Ga0077592_1045303	monosaccharide ABC transporter substrate-binding protein, CUT2 family	COG1879	[G]	Carbohydrate transport and metabolism	KO:K02058===ABC.SS.S===simple sugar transport system substrate-binding protein	-2.25877
Ga0077592_10151	Ga0077592_10151	ring-1,2-phenylacetyl-CoA epoxidase subunit PaaA				KO:K02609===paaA===ring-1,2-phenylacetyl-CoA epoxidase subunit PaaA [EC:1.14.13.149]	-2.25613
Ga0077592_115493	kynU	Kynureninase	COG3844	[E]	Amino acid transport and metabolism	KO:K01556===KYNU, kynU===kynureninase [EC:3.7.1.3]	-2.25427
Ga0077592_10094	Ga0077592_10094	hypothetical protein				0	-2.25371
Ga0077592_107147	Ga0077592_107147	hypothetical protein				0	-2.25307
Ga0077592_106428	Ga0077592_106428	NADH dehydrogenase	COG1252	[C]	Energy production and conversion	KO:K03885===ndh===NADH dehydrogenase [EC:1.6.99.3]	-2.24997
Ga0077592_105682	Ga0077592_105682					#N/A	-2.24304
Ga0077592_107250	Ga0077592_107250	cytochrome bo3 quinol oxidase subunit 2	COG1622	[C]	Energy production and conversion	KO:K02297===cyoA===cytochrome o ubiquinol oxidase subunit II [EC:1.10.3.-]	-2.24056
Ga0077592_1016229	Ga0077592_1016229					#N/A	-2.24006
Ga0077592_102516	Ga0077592_102516	Acyl-CoA hydrolase	COG1607	[I]	Lipid transport and metabolism	0	-2.23901
Ga0077592_1045342	Ga0077592_1045342	hypothetical protein				0	-2.23794
Ga0077592_1003201	Ga0077592_1003201	Nucleoside-diphosphate-sugar epimerase	COG0451	[M]	Cell wall/membrane/envelope biogenesis	0	-2.23732
Ga0077592_1109100	tufA1_1	translation elongation factor 1A (EF-1A/EF-Tu)	COG0050	[J]	Translation, ribosomal structure and biogenesis	KO:K02358===tuf, TUFM===elongation factor Tu	-2.23648
Ga0077592_1003319	Ga0077592_1003319	porin, GBP family	COG3203	[M]	Cell wall/membrane/envelope biogenesis	KO:K03285===TC.GBP===general bacterial porin, GBP family	-2.2331
Ga0077592_101389	Ga0077592_101389	hypothetical protein				0	-2.23117
Ga0077592_1010131	Ga0077592_1010131	quaternary ammonium compound-resistance protein SugE	COG2076	[V]	Defense mechanisms	KO:K11741===sugE===quaternary ammonium compound-resistance protein SugE	-2.22703
Ga0077592_115440	groS	chaperonin GroES	COG0234	[O]	Post-translational modification, protein turnover, and chaperones	KO:K04078===groES, HSPE1===chaperonin GroES	-2.22483
Ga0077592_106525	atpH	F-type H+-transporting ATPase subunit delta	COG0712	[C]	Energy production and conversion	KO:K02113===ATPF1D, atpH===F-type H+-transporting ATPase subunit delta	-2.2235
Ga0077592_110987	rplX	LSU ribosomal protein L24P	COG0198	[J]	Translation, ribosomal structure and biogenesis	KO:K02895===RP-L24, MRPL24, rplX===large subunit ribosomal protein L24	-2.22298
Ga0077592_109629	Ga0077592_109629					#N/A	-2.2182
Ga0077592_1045291	Ga0077592_1045291	Predicted arabinose efflux permease, MFS family	COG2814	[G]	Carbohydrate transport and metabolism	0	-2.21699
Ga0077592_114065	tsf	translation elongation factor Ts (EF-Ts)	COG0264	[J]	Translation, ribosomal structure and biogenesis	KO:K02357===tsf, TSFM===elongation factor Ts	-2.2158
Ga0077592_107255	Ga0077592_107255	two-component system, NarL family, nitrate/nitrite sensor histidine kinase NarX	COG3850	[T]	Signal transduction mechanisms	KO:K07673===narX===two-component system, NarL family, nitrate/nitrite sensor histidine kinase NarX [EC:2.7.13.3]	-2.21563
Ga0077592_1032214	glyA1	serine hydroxymethyltransferase	COG0112	[E]	Amino acid transport and metabolism	KO:K00600===glyA, SHMT===glycine hydroxymethyltransferase [EC:2.1.2.1]	-2.21283
Ga0077592_1045121	Ga0077592_1045121	amino acid/amide ABC transporter ATP-binding protein 1, HAAT family	COG0411=	[E]	Amino acid transport and metabolism	KO:K01995===livG===branched-chain amino acid transport system ATP-binding protein	-2.21005
Ga0077592_1073161	Ga0077592_1073161	cytochrome b561	COG3038	[C]	Energy production and conversion	KO:K12262===cybB===cytochrome b561	-2.20884
Ga0077592_115492	kynB	Kynurenine formamidase	COG1878	[E]	Amino acid transport and metabolism	KO:K07130===kynB===arylformamidase [EC:3.5.1.9]	-2.20547
Ga0077592_1084156	ompC_2	Outer membrane protein (porin)	COG3203	[M]	Cell wall/membrane/envelope biogenesis	0	-2.2054
Ga0077592_1073437	Ga0077592_1073437	uracil-xanthine permease	COG2233	[F]	Nucleotide transport and metabolism	0	-2.20193
Ga0077592_101374	soxB2_1	sarcosine oxidase subunit beta	COG0665	[E]	Amino acid transport and metabolism	KO:K00303===soxB===sarcosine oxidase, subunit beta [EC:1.5.3.1]	-2.19319
Ga0077592_101331	Ga0077592_101331	dihydroxyacid dehydratase	COG0129	[E]	Amino acid transport and metabolism	KO:K01687===ilvD===dihydroxy-acid dehydratase [EC:4.2.1.9]	-2.18798
Ga0077592_108244	Ga0077592_108244	sensor histidine kinase inhibitor, KipI family	COG2049	[E]	Amino acid transport and metabolism	0	-2.18339
Ga0077592_1115135	Ga0077592_1115135	multidrug efflux pump	COG0841	[V]	Defense mechanisms	KO:K18902===bpeF===multidrug efflux pump	-2.18295
Ga0077592_1045119	Ga0077592_1045119	amino acid/amide ABC transporter membrane protein 1, HAAT family	COG0559	[E]	Amino acid transport and metabolism	KO:K01997===livH===branched-chain amino acid transport system permease protein	-2.18203
Ga0077592_111061	Ga0077592_111061	hypothetical protein				0	-2.17803
Ga0077592_101020	Ga0077592_101020	NADH-quinone oxidoreductase subunit L	COG1009	[C]	Energy production and conversion	KO:K00341===nuoL===NADH-quinone oxidoreductase subunit L [EC:1.6.5.3]	-2.17643
Ga0077592_110954	Ga0077592_110954	Tfp pilus assembly protein PilO	COG3167	[N]	Cell motility	0	-2.17448
Ga0077592_1056123	Ga0077592_1056123					#N/A	-2.17418
Ga0077592_103437	Ga0077592_103437	Nucleotide-binding universal stress protein, UspA family	COG0589	[T]	Signal transduction mechanisms	0	-2.17063
Ga0077592_104110	tetR_2	DNA-binding transcriptional regulator, AcrR family	COG1309	[K]	Transcription	0	-2.1695
Ga0077592_111948	Ga0077592_111948	sulfate adenylyltransferase subunit 1	COG2895	[P]	Inorganic ion transport and metabolism	KO:K00956===cysN===sulfate adenylyltransferase subunit 1 [EC:2.7.7.4]	-2.16343
Ga0077592_104545	Ga0077592_104545	monosaccharide ABC transporter substrate-binding protein, CUT2 family	COG1879	[G]	Carbohydrate transport and metabolism	KO:K10439===rbsB===ribose transport system substrate-binding protein	-2.16104
Ga0077592_113611	Ga0077592_113611	CRISPR system Cascade subunit CasA				KO:K19123===casA, cse1===CRISPR system Cascade subunit CasA	-2.15713
Ga0077592_104968	BCAS0733	dihydroorotate oxidase B, catalytic subunit /dihydrouracil dehydrogenase (NAD+) /dihydropyrimidine dehydrogenase (NADP+)	COG0167	[F]	Nucleotide transport and metabolism	KO:K17723===preA===dihydropyrimidine dehydrogenase (NAD+) subunit PreA [EC:1.3.1.1]	-2.15558
Ga0077592_109255	Ga0077592_109255	conjugal transfer pilus assembly protein TraB				KO:K12065===traB===conjugal transfer pilus assembly protein TraB	-2.15497
Ga0077592_107124	Ga0077592_107124	Antirestriction protein				0	-2.15285
Ga0077592_1037116	Ga0077592_1037116	MFS transporter, MHS family, alpha-ketoglutarate permease	COG2814	[G]	Carbohydrate transport and metabolism	KO:K03761===kgtP===MFS transporter, MHS family, alpha-ketoglutarate permease	-2.14919
Ga0077592_1032139	lacI_2	monosaccharide ABC transporter substrate-binding protein, CUT2 family	COG1879	[G]	Carbohydrate transport and metabolism	KO:K02058===ABC.SS.S===simple sugar transport system substrate-binding protein	-2.14788
Ga0077592_103727	Ga0077592_103727	peroxiredoxin, Ohr subfamily	COG1764	[V]	Defense mechanisms	0	-2.14706
Ga0077592_105817	Ga0077592_105817	L-ornithine N5-oxygenase	COG3486	[Q]	Secondary metabolites biosynthesis, transport, and catabolism	KO:K10531===pvdA===L-ornithine N5-oxygenase [EC:1.13.12.-]	-2.14645
Ga0077592_1032148	Ga0077592_1032148	3-isopropylmalate dehydratase, small subunit	COG0066	[E]	Amino acid transport and metabolism	KO:K01704===leuD===3-isopropylmalate/(R)-2-methylmalate dehydratase small subunit [EC:4.2.1.33 4.2.1.35]	-2.14578
Ga0077592_102548	Ga0077592_102548	hypothetical protein				0	-2.14214
Ga0077592_107329	Ga0077592_107329	membrane fusion protein, multidrug efflux system	COG0845	[M]	Cell wall/membrane/envelope biogenesis	KO:K03585===acrA, mexA, adeI, smeD, mtrC, cmeA===membrane fusion protein, multidrug efflux system	-2.13665
Ga0077592_1097205	Ga0077592_1097205	hypothetical protein				0	-2.13624
Ga0077592_114060	Ga0077592_114060	hypothetical protein				0	-2.13504
Ga0077592_1003212	Ga0077592_1003212	hypothetical protein				0	-2.13019
Ga0077592_1043123	Ga0077592_1043123	xylulose-5-phosphate/fructose-6-phosphate phosphoketolase	COG3957	[G]	Carbohydrate transport and metabolism	KO:K01621===xfp, xpk===xylulose-5-phosphate/fructose-6-phosphate phosphoketolase [EC:4.1.2.9 4.1.2.22]	-2.12932
Ga0077592_102933	Ga0077592_102933	carbohydrate ABC transporter membrane protein 2, CUT1 family	COG0395	[G]	Carbohydrate transport and metabolism	KO:K02026===ABC.MS.P1===multiple sugar transport system permease protein	-2.12606
Ga0077592_10363	Ga0077592_10363	ring-1,2-phenylacetyl-CoA epoxidase subunit PaaC	COG3396	[Q]	Secondary metabolites biosynthesis, transport, and catabolism	KO:K02611===paaC===ring-1,2-phenylacetyl-CoA epoxidase subunit PaaC [EC:1.14.13.149]	-2.12527
Ga0077592_10712	Ga0077592_10712	hypothetical protein				0	-2.12232
Ga0077592_103439	Ga0077592_103439	hypothetical protein	COG4288	[S]	Function unknown	0	-2.12161
Ga0077592_10365	paaA	ring-1,2-phenylacetyl-CoA epoxidase subunit PaaA	COG3396	[Q]	Secondary metabolites biosynthesis, transport, and catabolism	KO:K02609===paaA===ring-1,2-phenylacetyl-CoA epoxidase subunit PaaA [EC:1.14.13.149]	-2.12135
Ga0077592_1043189	Ga0077592_1043189	hypothetical protein				0	-2.11759
Ga0077592_10136	Ga0077592_10136	glutathione S-transferase	COG0625	[O]	Post-translational modification, protein turnover, and chaperones	KO:K00799===GST, gst===glutathione S-transferase [EC:2.5.1.18]	-2.11749
Ga0077592_109238	Ga0077592_109238	Nitrogen regulatory protein PII	COG0347	[E]	Amino acid transport and metabolism	0	-2.11645
Ga0077592_109024	Ga0077592_109024	Transposase				KO:K07483===K07483===transposase	-2.11331
Ga0077592_1032174	Ga0077592_1032174	UbiD family decarboxylase	COG0043	[H]	Coenzyme transport and metabolism	0	-2.1122
Ga0077592_109731	gltA	citrate synthase	COG0372	[C]	Energy production and conversion	KO:K01647===CS, gltA===citrate synthase [EC:2.3.3.1]	-2.11165
Ga0077592_112817	Ga0077592_112817	protein of unknown function (DUF4148)				0	-2.10889
Ga0077592_104921	Ga0077592_104921	3-methylcrotonoyl-CoA carboxylase, alpha subunit	COG4770	[I]	Lipid transport and metabolism	KO:K01968===E6.4.1.4A===3-methylcrotonyl-CoA carboxylase alpha subunit [EC:6.4.1.4]	-2.10637
Ga0077592_108233	Ga0077592_108233	methylenetetrahydrofolate reductase (NADPH)	COG0685	[E]	Amino acid transport and metabolism	KO:K00297===metF, MTHFR===methylenetetrahydrofolate reductase (NADPH) [EC:1.5.1.20]	-2.10263
Ga0077592_1016190	Ga0077592_1016190	prolyl 4-hydroxylase				KO:K00472===E1.14.11.2===prolyl 4-hydroxylase [EC:1.14.11.2]	-2.10253
Ga0077592_1045264	Ga0077592_1045264	His Kinase A (phospho-acceptor) domain-containing protein				KO:K13924===cheBR===two-component system, chemotaxis family, CheB/CheR fusion protein [EC:2.1.1.80 3.1.1.61]	-2.10171
Ga0077592_1003323	Ga0077592_1003323	HTH-type transcriptional regulator / antitoxin HipB	COG1476	[K]	Transcription	KO:K15773===hipB===HTH-type transcriptional regulator / antitoxin HipB	-2.09912
Ga0077592_1118150	trmD	tRNA (guanine37-N1)-methyltransferase	COG0336	[J]	Translation, ribosomal structure and biogenesis	KO:K00554===trmD===tRNA (guanine37-N1)-methyltransferase [EC:2.1.1.228]	-2.0959
Ga0077592_1115150	Ga0077592_1115150	cyclohexyl-isocyanide hydratase	COG4977	[K]	Transcription	KO:K18199===E4.2.1.103, inhA===cyclohexyl-isocyanide hydratase [EC:4.2.1.103]	-2.09113
Ga0077592_103725	Ga0077592_103725	esterase, PHB depolymerase family	COG3509	[Q]	Secondary metabolites biosynthesis, transport, and catabolism	0	-2.08659
Ga0077592_109259	Ga0077592_109259	hypothetical protein				0	-2.08407
Ga0077592_114032	aceA	isocitrate lyase	COG2224	[C]	Energy production and conversion	KO:K01637===E4.1.3.1, aceA===isocitrate lyase [EC:4.1.3.1]	-2.08395
Ga0077592_108241	Ga0077592_108241	Uncharacterized membrane protein	COG3819	[S]	Function unknown	0	-2.0815
Ga0077592_1045201	lacI_4	transcriptional regulator, LacI family	COG1879	[G]	Carbohydrate transport and metabolism	KO:K02529===lacI, galR===LacI family transcriptional regulator	-2.07982
Ga0077592_10454	Ga0077592_10454	urea transporter	COG4413	[E]	Amino acid transport and metabolism	KO:K08717===utp===urea transporter	-2.07879
Ga0077592_1109102	rpsG	SSU ribosomal protein S7P	COG0049	[J]	Translation, ribosomal structure and biogenesis	KO:K02992===RP-S7, MRPS7, rpsG===small subunit ribosomal protein S7	-2.07506
Ga0077592_1115202	Ga0077592_1115202	hypothetical protein				0	-2.07381
Ga0077592_1073190	Ga0077592_1073190					#N/A	-2.07304
Ga0077592_1073209	Ga0077592_1073209	3-hydroxyacyl-CoA dehydrogenase	COG1250	[I]	Lipid transport and metabolism	KO:K07516===fadN===3-hydroxyacyl-CoA dehydrogenase [EC:1.1.1.35]	-2.07191
Ga0077592_10722	nahW	salicylate hydroxylase	COG0654	[H]	Coenzyme transport and metabolism	KO:K00480===E1.14.13.1===salicylate hydroxylase [EC:1.14.13.1]	-2.0577
Ga0077592_101018	nuoN	NADH dehydrogenase subunit N	COG1007	[C]	Energy production and conversion	KO:K00343===nuoN===NADH-quinone oxidoreductase subunit N [EC:1.6.5.3]	-2.05679
Ga0077592_1012150	Ga0077592_1012150	flagellar transcriptional activator FlhC				KO:K02402===flhC===flagellar transcriptional activator FlhC	-2.05674
Ga0077592_109750	Ga0077592_109750	hypothetical protein				0	-2.05551
Ga0077592_1037115	Ga0077592_1037115	Protein of unknown function (DUF2891)				0	-2.05119
Ga0077592_1003341	Ga0077592_1003341	MFS transporter, DHA2 family, multidrug resistance protein				KO:K03446===emrB===MFS transporter, DHA2 family, multidrug resistance protein	-2.04949
Ga0077592_1073455	mreC	rod shape-determining protein MreC	COG1792	[D]	Cell cycle control, cell division, chromosome partitioning	KO:K03570===mreC===rod shape-determining protein MreC	-2.04862
Ga0077592_1056143	merR_1	Cu(I)-responsive transcriptional regulator	COG0789	[K]	Transcription	0	-2.04846
Ga0077592_1043230	Ga0077592_1043230	Rieske [2Fe-2S] domain-containing protein				0	-2.04635
Ga0077592_105897	Ga0077592_105897	amino acid/amide ABC transporter substrate-binding protein, HAAT family	COG0683	[E]	Amino acid transport and metabolism	KO:K01999===livK===branched-chain amino acid transport system substrate-binding protein	-2.04295
Ga0077592_1003340	Ga0077592_1003340	membrane fusion protein, multidrug efflux system	COG156	[V]	Defense mechanisms	KO:K03543===emrA===membrane fusion protein, multidrug efflux system	-2.04149
Ga0077592_10362	Ga0077592_10362	ring-1,2-phenylacetyl-CoA epoxidase subunit PaaD	COG215	[O]	Post-translational modification, protein turnover, and chaperones	KO:K02612===paaD===ring-1,2-phenylacetyl-CoA epoxidase subunit PaaD	-2.04117
Ga0077592_105819	Ga0077592_105819	non-ribosomal peptide synthase domain TIGR01720/amino acid adenylation domain-containing protein	COG1020	[Q]	Secondary metabolites biosynthesis, transport, and catabolism	0	-2.0403
Ga0077592_1073385	Ga0077592_1073385	hypothetical protein				0	-2.03918
Ga0077592_1084206	Ga0077592_1084206	aminopeptidase N	COG0308	[E]	Amino acid transport and metabolism	KO:K01256===pepN===aminopeptidase N [EC:3.4.11.2]	-2.03789
Ga0077592_109235	Ga0077592_109235	Protein of unknown function (DUF2933)				0	-2.03639
Ga0077592_100343	Ga0077592_100343	cellulose synthase operon protein YhjQ	COG1192	[N]	Cell motility	0	-2.03245
Ga0077592_1115134	Ga0077592_1115134	outer membrane protein, multidrug efflux system	COG1538	[M]	Cell wall/membrane/envelope biogenesis	KO:K18903===oprC, opcM===outer membrane protein, multidrug efflux system	-2.03076
Ga0077592_1056145	Ga0077592_1056145	dTDP-4-dehydrorhamnose reductase	COG1091	[M]	Cell wall/membrane/envelope biogenesis	KO:K00067===rfbD, rmlD===dTDP-4-dehydrorhamnose reductase [EC:1.1.1.133]	-2.02973
Ga0077592_109290	Ga0077592_109290	DNA-binding transcriptional regulator, ArsR family	COG0640	[K]	Transcription	0	-2.02831
Ga0077592_112167	Ga0077592_112167	beta-alanine--pyruvate transaminase	COG0161	[H]	Coenzyme transport and metabolism	KO:K00822===E2.6.1.18===beta-alanine--pyruvate transaminase [EC:2.6.1.18]	-2.02759
Ga0077592_107135	Ga0077592_107135	type IV secretion system protein VirB9	COG3504	[U]	Intracellular trafficking, secretion, and vesicular transport	KO:K03204===virB9, lvhB9===type IV secretion system protein VirB9	-2.02578
Ga0077592_112846	Ga0077592_112846	succinate semialdehyde dehydrogenase	COG1012	[C]	Energy production and conversion	KO:K00135===gabD===succinate-semialdehyde dehydrogenase / glutarate-semialdehyde dehydrogenase [EC:1.2.1.16 1.2.1.79 1.2.1.20]	-2.0256
Ga0077592_105883	Ga0077592_105883	poly(3-hydroxyalkanoate) depolymerase	COG0596	[H]	Coenzyme transport and metabolism	0	-2.02444
Ga0077592_112333	Ga0077592_112333	Anaerobic selenocysteine-containing dehydrogenase	COG0243	[C]	Energy production and conversion	0	-2.0239
Ga0077592_1154151	gapA	glyceraldehyde-3-phosphate dehydrogenase (NAD+)	COG0057	[G]	Carbohydrate transport and metabolism	KO:K00134===GAPDH, gapA===glyceraldehyde 3-phosphate dehydrogenase [EC:1.2.1.12]	-2.02235
Ga0077592_107136	Ga0077592_107136	Conjugal transfer protein TrbH				0	-2.01847
Ga0077592_109256	Ga0077592_109256	conjugal transfer pilus assembly protein TraK				KO:K12066===traK===conjugal transfer pilus assembly protein TraK	-2.01613
Ga0077592_111947	Ga0077592_111947	uroporphyrin-III C-methyltransferase	COG0007	[H]	Coenzyme transport and metabolism	KO:K02303===cobA===uroporphyrin-III C-methyltransferase [EC:2.1.1.107]	-2.01518
Ga0077592_112132	lysR_69	DNA-binding transcriptional regulator, LysR family	COG0583	[K]	Transcription	0	-2.01265
Ga0077592_11218	Ga0077592_11218	hypothetical protein				0	-2.01149
Ga0077592_113278	Ga0077592_113278	hypothetical protein				0	-2.01077
Ga0077592_1140106	alc	allantoicase	COG4266	[F]	Nucleotide transport and metabolism	KO:K01477===alc, ALLC===allantoicase [EC:3.5.3.4]	-1.99877
Ga0077592_115338	Ga0077592_115338	hypothetical protein	COG2391	[R]	General function prediction only	KO:K07112===K07112===uncharacterized protein	-1.99757
Ga0077592_1118103	Ga0077592_1118103	ribonuclease E	COG1530	[J]	Translation, ribosomal structure and biogenesis	KO:K08300===rne===ribonuclease E [EC:3.1.26.12]	-1.9935
Ga0077592_112837	Ga0077592_112837	DNA-binding transcriptional regulator, AcrR family	COG1309	[K]	Transcription	0	-1.99141
Ga0077592_101616	Ga0077592_101616	CoA-transferase family III				0	-1.98988
Ga0077592_106512	Ga0077592_106512	L-proline dehydrogenase /delta-1-pyrroline-5-carboxylate dehydrogenase	COG4230	[E]	Amino acid transport and metabolism	KO:K13821===putA===RHH-type transcriptional regulator, proline utilization regulon repressor / proline dehydrogenase / delta 1-pyrroline-5-carboxylate dehydrogenase [EC:1.5.5.2 1.2.1.88]	-1.98952
Ga0077592_100338	Ga0077592_100338	cellulose synthase subunit				0	-1.98866
Ga0077592_109237	Ga0077592_109237	Protein of unknown function with PCYCGC motif-containing protein				0	-1.9862
Ga0077592_107318	flhA_1	S-(hydroxymethyl)glutathione dehydrogenase / alcohol dehydrogenase	COG1062	[R]	General function prediction only	KO:K00121===frmA, ADH5, adhC===S-(hydroxymethyl)glutathione dehydrogenase / alcohol dehydrogenase [EC:1.1.1.284 1.1.1.1]	-1.98291
Ga0077592_113227	Ga0077592_113227					#N/A	-1.98281
Ga0077592_1073391	rpsU_1	SSU ribosomal protein S21P	COG0828	[J]	Translation, ribosomal structure and biogenesis	KO:K02970===RP-S21, MRPS21, rpsU===small subunit ribosomal protein S21	-1.98172
Ga0077592_10844	Ga0077592_10844	Cu+-exporting ATPase	COG2217	[P]	Inorganic ion transport and metabolism	KO:K17686===copA, ATP7===Cu+-exporting ATPase [EC:3.6.3.54]	-1.97807
Ga0077592_11256	Ga0077592_11256	hypothetical protein	COG3607	[R]	General function prediction only	KO:K07032===K07032===uncharacterized protein	-1.97487
Ga0077592_1032221	Ga0077592_1032221	Pimeloyl-ACP methyl ester carboxylesterase	COG0596	[H]	Coenzyme transport and metabolism	0	-1.9741
Ga0077592_10492	phnT	2-aminoethylphosphonate transport system ATP-binding protein	COG3842	[E]	Amino acid transport and metabolism	KO:K11084===phnT===2-aminoethylphosphonate transport system ATP-binding protein	-1.9717
Ga0077592_1097182	Ga0077592_1097182	hypothetical protein				0	-1.97114
Ga0077592_109264	Ga0077592_109264	hypothetical protein				0	-1.96993
Ga0077592_109261	Ga0077592_109261	conjugal transfer pilus assembly protein TraU				KO:K12060===traU===conjugal transfer pilus assembly protein TraU	-1.96745
Ga0077592_113476	argD_2	succinylornithine aminotransferase apoenzyme	COG4992	[E]	Amino acid transport and metabolism	KO:K00821===argD===acetylornithine/N-succinyldiaminopimelate aminotransferase [EC:2.6.1.11 2.6.1.17]	-1.96147
Ga0077592_1073297	Ga0077592_1073297	Cytochrome oxidase assembly protein ShyY1	COG3346	[O]	Post-translational modification, protein turnover, and chaperones	0	-1.96026
Ga0077592_11237	Ga0077592_11237	Outer membrane protein (porin)	COG3203	[M]	Cell wall/membrane/envelope biogenesis	0	-1.96025
Ga0077592_103284	Ga0077592_103284	NAD(P)-dependent dehydrogenase, short-chain alcohol dehydrogenase family	COG1028	[R]	General function prediction only	0	-1.96017
Ga0077592_107281	Ga0077592_107281	hypothetical protein				0	-1.95511
Ga0077592_108232	BPSL3289	putative membrane protein	COG1950	[S]	Function unknown	KO:K08972===K08972===putative membrane protein	-1.94909
Ga0077592_107114	Ga0077592_107114	replication region DNA-binding N-term				0	-1.94764
Ga0077592_109236	Ga0077592_109236	hypothetical protein				0	-1.94614
Ga0077592_1073149	Ga0077592_1073149	catalase	COG0753	[P]	Inorganic ion transport and metabolism	KO:K03781===katE, CAT, catB, srpA===catalase [EC:1.11.1.6]	-1.94612
Ga0077592_1003233	Ga0077592_1003233	putative spermidine/putrescine transport system substrate-binding protein	COG0687	[E]	Amino acid transport and metabolism	KO:K02055===ABC.SP.S===putative spermidine/putrescine transport system substrate-binding protein	-1.94571
Ga0077592_10713	topB2	DNA topoisomerase-3	COG0550	[L]	Replication, recombination and repair	KO:K03169===topB===DNA topoisomerase III [EC:5.99.1.2]	-1.94239
Ga0077592_107257	Ga0077592_107257	regulatory protein, luxR family				KO:K07684===narL===two-component system, NarL family, nitrate/nitrite response regulator NarL	-1.9404
Ga0077592_1092104	Ga0077592_1092104	mercuric reductase	COG1249	[C]	Energy production and conversion	KO:K00520===merA===mercuric reductase [EC:1.16.1.1]	-1.93363
Ga0077592_115494	kynA	tryptophan 2,3-dioxygenase	COG3483	[E]	Amino acid transport and metabolism	KO:K00453===E1.13.11.11, TDO2===tryptophan 2,3-dioxygenase [EC:1.13.11.11]	-1.93349
Ga0077592_1154140	Ga0077592_1154140	DNA polymerase III, delta subunit	COG1466	[L]	Replication, recombination and repair	KO:K02340===DPO3D1, holA===DNA polymerase III subunit delta [EC:2.7.7.7]	-1.93227
Ga0077592_1073358	Ga0077592_1073358	Protein of unknown function (DUF3567)				0	-1.93091
Ga0077592_10461	Ga0077592_10461	Mu transposase, C-terminal				KO:K07497===K07497===putative transposase	-1.93056
Ga0077592_112548	Ga0077592_112548	3-oxoadipyl-CoA thiolase	COG0183	[I]	Lipid transport and metabolism	KO:K00626===E2.3.1.9, atoB===acetyl-CoA C-acetyltransferase [EC:2.3.1.9]	-1.9286
Ga0077592_108111	Ga0077592_108111	L-serine dehydratase	COG1760	[E]	Amino acid transport and metabolism	KO:K01752===E4.3.1.17, sdaA, sdaB, tdcG===L-serine dehydratase [EC:4.3.1.17]	-1.92599
Ga0077592_1045118	Ga0077592_1045118	amino acid/amide ABC transporter substrate-binding protein, HAAT family	COG0683	[E]	Amino acid transport and metabolism	KO:K01999===livK===branched-chain amino acid transport system substrate-binding protein	-1.92525
Ga0077592_103323	citB	aconitase	COG1048	[C]	Energy production and conversion	KO:K01681===ACO, acnA===aconitate hydratase [EC:4.2.1.3]	-1.92158
Ga0077592_1097271	Ga0077592_1097271	Glyoxylase, beta-lactamase superfamily II	COG0491	[R]	General function prediction only	0	-1.91906
Ga0077592_109733	sdhB_2	succinate dehydrogenase subunit B	COG0479	[C]	Energy production and conversion	KO:K00240===sdhB, frdB===succinate dehydrogenase / fumarate reductase, iron-sulfur subunit [EC:1.3.5.1 1.3.5.4]	-1.91734
Ga0077592_1003251	Ga0077592_1003251	Acyl-CoA dehydrogenase	COG1960	[I]	Lipid transport and metabolism	0	-1.91668
Ga0077592_104151	paaF	short chain enoyl-CoA hydratase	COG1024	[I]	Lipid transport and metabolism	KO:K01692===paaF, echA===enoyl-CoA hydratase [EC:4.2.1.17]	-1.91514
Ga0077592_1097208	Ga0077592_1097208	DNA-binding transcriptional regulator, Lrp family	COG1522	[K]	Transcription	0	-1.91075
Ga0077592_103735	Ga0077592_103735	NADH dehydrogenase	COG1252	[C]	Energy production and conversion	KO:K03885===ndh===NADH dehydrogenase [EC:1.6.99.3]	-1.90959
Ga0077592_10428	rplI	LSU ribosomal protein L9P	COG0359	[J]	Translation, ribosomal structure and biogenesis	KO:K02939===RP-L9, MRPL9, rplI===large subunit ribosomal protein L9	-1.90749
Ga0077592_1045203	Ga0077592_1045203	3-phenylpropionate/trans-cinnamate dioxygenase ferredoxin subunit	COG2146	[P]	Inorganic ion transport and metabolism	KO:K05710===hcaC===3-phenylpropionate/trans-cinnamate dioxygenase ferredoxin subunit	-1.90624
Ga0077592_110998	rplC	LSU ribosomal protein L3P	COG0087	[J]	Translation, ribosomal structure and biogenesis	KO:K02906===RP-L3, MRPL3, rplC===large subunit ribosomal protein L3	-1.90545
Ga0077592_10361	paaK	ring-1,2-phenylacetyl-CoA epoxidase subunit PaaE	COG1018	[C]	Energy production and conversion	KO:K02613===paaE===ring-1,2-phenylacetyl-CoA epoxidase subunit PaaE	-1.90441
Ga0077592_107338	Ga0077592_107338	Phospholipase/lecithinase/hemolysin	COG3240	[R]	General function prediction only	0	-1.90382
Ga0077592_1073425	Ga0077592_1073425	N-acetylglucosaminyl deacetylase, LmbE family	COG2120	[G]	Carbohydrate transport and metabolism	0	-1.90312
Ga0077592_111949	Ga0077592_111949	sulfate adenylyltransferase subunit 2	COG0175	[E]	Amino acid transport and metabolism	KO:K00957===cysD===sulfate adenylyltransferase subunit 2 [EC:2.7.7.4]	-1.90221
Ga0077592_107122	Ga0077592_107122	hypothetical protein				0	-1.90141
Ga0077592_1012146	Ga0077592_1012146	enoyl-CoA hydratase	COG1024	[I]	Lipid transport and metabolism	KO:K01692===paaF, echA===enoyl-CoA hydratase [EC:4.2.1.17]	-1.8987
Ga0077592_111950	Ga0077592_111950	phosphoadenylylsulfate reductase (thioredoxin)	COG0175	[E]	Amino acid transport and metabolism	KO:K00390===cysH===phosphoadenosine phosphosulfate reductase [EC:1.8.4.8]	-1.8971
Ga0077592_109297	Ga0077592_109297	Predicted arabinose efflux permease, MFS family	COG2814	[G]	Carbohydrate transport and metabolism	0	-1.89551
Ga0077592_1003342	Ga0077592_1003342	efflux transporter, outer membrane factor (OMF) lipoprotein, NodT family	COG1538	[M]	Cell wall/membrane/envelope biogenesis	0	-1.89332
Ga0077592_1056133	nifU	FeS assembly scaffold apoprotein IscU	COG0822	[O]	Post-translational modification, protein turnover, and chaperones	KO:K04488===iscU, nifU===nitrogen fixation protein NifU and related proteins	-1.89049
Ga0077592_114253	Ga0077592_114253	ribonucleoside-diphosphate reductase class II	COG0209	[F]	Nucleotide transport and metabolism	KO:K00525===E1.17.4.1A, nrdA, nrdE===ribonucleoside-diphosphate reductase alpha chain [EC:1.17.4.1]	-1.88672
Ga0077592_11493	Ga0077592_11493	Transposase	COG3547	[X]	Mobilome: prophages, transposons	0	-1.8839
Ga0077592_1140105	Ga0077592_1140105	2-oxo-4-hydroxy-4-carboxy-5-ureidoimidazoline decarboxylase	COG3195	[F]	Nucleotide transport and metabolism	KO:K13485===PRHOXNB, URAD===2-oxo-4-hydroxy-4-carboxy-5-ureidoimidazoline decarboxylase [EC:4.1.1.97]	-1.88301
Ga0077592_108591	Ga0077592_108591	regulatory protein, tetR family				0	-1.87931
Ga0077592_109739	Ga0077592_109739	alanine or glycine:cation symporter, AGCS family	COG1115	[E]	Amino acid transport and metabolism	KO:K03310===TC.AGCS===alanine or glycine:cation symporter, AGCS family	-1.87928
Ga0077592_10235	Ga0077592_10235	hypothetical protein				0	-1.87865
Ga0077592_103214	Ga0077592_103214	Transcriptional regulator GlxA family, contains an amidase domain and an AraC-type DNA-binding HTH domain	COG4977	[K]	Transcription	0	-1.87661
Ga0077592_1073208	BCAL0886	acetyl-CoA acyltransferase	COG0183	[I]	Lipid transport and metabolism	KO:K00632===fadA, fadI===acetyl-CoA acyltransferase [EC:2.3.1.16]	-1.87585
Ga0077592_101024	nuoH	NADH dehydrogenase subunit H	COG1005	[C]	Energy production and conversion	KO:K00337===nuoH===NADH-quinone oxidoreductase subunit H [EC:1.6.5.3]	-1.87454
Ga0077592_10648	Ga0077592_10648	putative hydrolase of the HAD superfamily	COG1011	[H]	Coenzyme transport and metabolism	KO:K07025===K07025===putative hydrolase of the HAD superfamily	-1.87416
Ga0077592_107223	Ga0077592_107223	non-heme chloroperoxidase	COG0596	[H]	Coenzyme transport and metabolism	KO:K00433===cpo===non-heme chloroperoxidase [EC:1.11.1.10]	-1.87254
Ga0077592_111849	carB	carbamoyl-phosphate synthase large subunit	COG0458	[E]	Amino acid transport and metabolism	KO:K01955===carB, CPA2===carbamoyl-phosphate synthase large subunit [EC:6.3.5.5]	-1.87247
Ga0077592_107334	Ga0077592_107334	serine protease Do	COG0265	[O]	Post-translational modification, protein turnover, and chaperones	KO:K04771===degP, htrA===serine protease Do [EC:3.4.21.107]	-1.86944
Ga0077592_110972	rpsD	SSU ribosomal protein S4P	COG0522	[J]	Translation, ribosomal structure and biogenesis	KO:K02986===RP-S4, rpsD===small subunit ribosomal protein S4	-1.86934
Ga0077592_111929	Ga0077592_111929	iron complex transport system permease protein	COG0609	[P]	Inorganic ion transport and metabolism	KO:K02015===ABC.FEV.P===iron complex transport system permease protein	-1.86876
Ga0077592_113416	Ga0077592_113416	phasin family protein				0	-1.86764
Ga0077592_1003322	Ga0077592_1003322	propionate CoA-transferase	COG4670	[I]	Lipid transport and metabolism	KO:K01026===pct===propionate CoA-transferase [EC:2.8.3.1]	-1.86374
Ga0077592_1043161	Ga0077592_1043161	reactive intermediate/imine deaminase	COG0251	[V]	Defense mechanisms	0	-1.86145
Ga0077592_10817	gcvT	aminomethyltransferase	COG0404	[E]	Amino acid transport and metabolism	KO:K00605===gcvT, AMT===aminomethyltransferase [EC:2.1.2.10]	-1.86063
Ga0077592_1097270	Ga0077592_1097270	Uncharacterized conserved protein, DUF849 family	COG3246	[S]	Function unknown	0	-1.85924
Ga0077592_101019	nuoM	NADH dehydrogenase subunit M	COG1008	[C]	Energy production and conversion	KO:K00342===nuoM===NADH-quinone oxidoreductase subunit M [EC:1.6.5.3]	-1.85798
Ga0077592_109743	Ga0077592_109743	iron complex outermembrane recepter protein	COG1629	[P]	Inorganic ion transport and metabolism	KO:K02014===TC.FEV.OM===iron complex outermembrane recepter protein	-1.85719
Ga0077592_100339	Ga0077592_100339	endoglucanase	COG3405	[G]	Carbohydrate transport and metabolism	KO:K01179===E3.2.1.4===endoglucanase [EC:3.2.1.4]	-1.85646
Ga0077592_112547	Ga0077592_112547	3-hydroxyacyl-CoA dehydrogenase	COG1250	[I]	Lipid transport and metabolism	KO:K00074===paaH, hbd, fadB, mmgB===3-hydroxybutyryl-CoA dehydrogenase [EC:1.1.1.157]	-1.8534
Ga0077592_104969	RSc1233	nucleobase:cation symporter-1, NCS1 family	COG1953	[H]	Coenzyme transport and metabolism	KO:K03457===TC.NCS1===nucleobase:cation symporter-1, NCS1 family	-1.85327
Ga0077592_103799	frc_2	formyl-CoA transferase	COG1804	[I]	Lipid transport and metabolism	KO:K07749===frc===formyl-CoA transferase [EC:2.8.3.16]	-1.85051
Ga0077592_112813	Ga0077592_112813	Cytosine/adenosine deaminase	COG0402	[R]	General function prediction only	0	-1.848
Ga0077592_107133	Ga0077592_107133	type IV secretion system protein VirB4	COG3451	[U]	Intracellular trafficking, secretion, and vesicular transport	KO:K03199===virB4, lvhB4===type IV secretion system protein VirB4	-1.84772
Ga0077592_10137	Ga0077592_10137	hypothetical protein	COG1018	[C]	Energy production and conversion	KO:K07006===K07006===uncharacterized protein	-1.84504
Ga0077592_111938	lysR_68	DNA-binding transcriptional regulator, LysR family	COG0583	[K]	Transcription	0	-1.84252
Ga0077592_1073404	Ga0077592_1073404	hypothetical protein				0	-1.84219
Ga0077592_1016163	Ga0077592_1016163	molybdate transport system permease protein	COG4149	[P]	Inorganic ion transport and metabolism	KO:K02018===modB===molybdate transport system permease protein	-1.84048
Ga0077592_1092138	Ga0077592_1092138	TrfB transcriptional repressor				0	-1.8392
Ga0077592_10933	Ga0077592_10933	GTP cyclohydrolase II	COG0807	[H]	Coenzyme transport and metabolism	KO:K01497===ribA, RIB1===GTP cyclohydrolase II [EC:3.5.4.25]	-1.83918
Ga0077592_109785	Ga0077592_109785	hypothetical protein	COG0730	[S]	Function unknown	KO:K07090===K07090===uncharacterized protein	-1.83908
Ga0077592_113413	Ga0077592_113413	pyruvate dehydrogenase E1 component	COG2609	[C]	Energy production and conversion	KO:K00163===aceE===pyruvate dehydrogenase E1 component [EC:1.2.4.1]	-1.83827
Ga0077592_107138	Ga0077592_107138	P-type conjugative transfer protein TrbJ	COG5314	[X]	Mobilome: prophages, transposons	0	-1.83791
Ga0077592_111214	Ga0077592_111214	Cd2+/Zn2+-exporting ATPase	COG2217	[P]	Inorganic ion transport and metabolism	KO:K01534===zntA===Cd2+/Zn2+-exporting ATPase [EC:3.6.3.3 3.6.3.5]	-1.83536
Ga0077592_109747	lysR_59	transcriptional regulator, LysR family	COG0583	[K]	Transcription	KO:K03576===metR===LysR family transcriptional regulator, regulator for metE and metH	-1.83313
Ga0077592_104546	Ga0077592_104546	transcriptional regulator, LacI family	COG1609	[K]	Transcription	KO:K02529===lacI, galR===LacI family transcriptional regulator	-1.8326
Ga0077592_104548	Ga0077592_104548	aldose 1-epimerase	COG2017	[G]	Carbohydrate transport and metabolism	KO:K01785===galM, GALM===aldose 1-epimerase [EC:5.1.3.3]	-1.83246
Ga0077592_1073290	Ga0077592_1073290	DNA-binding transcriptional regulator, MarR family	COG1846	[K]	Transcription	0	-1.83127
Ga0077592_115321	Ga0077592_115321	H+/Cl- antiporter ClcA	COG0038	[P]	Inorganic ion transport and metabolism	0	-1.83106
Ga0077592_100388	Ga0077592_100388	putative N-acetyltransferase, MSMEG_0567 N-terminal domain family				0	-1.82977
Ga0077592_100621	Ga0077592_100621	NAD(P)-dependent dehydrogenase, short-chain alcohol dehydrogenase family	COG1028	[R]	General function prediction only	0	-1.82772
Ga0077592_112516	Ga0077592_112516	Threonine/homoserine efflux transporter RhtA	COG5006	[E]	Amino acid transport and metabolism	0	-1.82294
Ga0077592_1003321	Ga0077592_1003321	ThiF family protein				KO:K00014===aroE===shikimate dehydrogenase [EC:1.1.1.25]	-1.82176
Ga0077592_1073270	rplY	large subunit ribosomal protein L25	COG1825	[J]	Translation, ribosomal structure and biogenesis	KO:K02897===RP-L25, rplY===large subunit ribosomal protein L25	-1.82088
Ga0077592_1084129	Ga0077592_1084129	hypothetical protein				0	-1.81878
Ga0077592_1073495	yidC	YidC/Oxa1 family membrane protein insertase	COG0706	[M]	Cell wall/membrane/envelope biogenesis	KO:K03217===yidC, spoIIIJ, OXA1===YidC/Oxa1 family membrane protein insertase	-1.81854
Ga0077592_1097125	iclR_14	DNA-binding transcriptional regulator, IclR family	COG1414	[K]	Transcription	0	-1.81808
Ga0077592_1065105	Ga0077592_1065105	carbon-monoxide dehydrogenase medium subunit	COG1319	[C]	Energy production and conversion	KO:K03519===coxM, cutM===carbon-monoxide dehydrogenase medium subunit [EC:1.2.99.2]	-1.81468
Ga0077592_101377	Ga0077592_101377	sarcosine oxidase subunit gamma	COG4583	[E]	Amino acid transport and metabolism	KO:K00305===soxG===sarcosine oxidase, subunit gamma [EC:1.5.3.1]	-1.81436
Ga0077592_101682	Ga0077592_101682	Acetyl-CoA acetyltransferase	COG0183	[I]	Lipid transport and metabolism	0	-1.81373
Ga0077592_107120	Ga0077592_107120	Protein of unknown function (DUF2688)				0	-1.8133
Ga0077592_109834	Ga0077592_109834	diguanylate cyclase (GGDEF) domain-containing protein	COG2199	[T]	Signal transduction mechanisms	0	-1.81245
Ga0077592_101054	Ga0077592_101054	malonate decarboxylase beta subunit	COG0777=	[I]	Lipid transport and metabolism	KO:K13932===mdcD===malonate decarboxylase beta subunit [EC:4.1.1.87]	-1.81188
Ga0077592_113279	Ga0077592_113279	hypothetical protein				0	-1.8118
Ga0077592_1056106	truB	tRNA pseudouridine55 synthase	COG0130	[J]	Translation, ribosomal structure and biogenesis	KO:K03177===truB, PUS4, TRUB1===tRNA pseudouridine55 synthase [EC:5.4.99.25]	-1.81075
Ga0077592_1016212	ppc	Phosphoenolpyruvate carboxylase, type 1	COG2352	[C]	Energy production and conversion	KO:K01595===ppc===phosphoenolpyruvate carboxylase [EC:4.1.1.31]	-1.8105
Ga0077592_104150	paaN	phenylacetic acid degradation protein paaN	COG1012	[C]	Energy production and conversion	0	-1.80835
Ga0077592_1073148	Ga0077592_1073148	hypothetical protein				0	-1.80732
Ga0077592_114016	iclR_18	transcriptional regulator, IclR family	COG1414	[K]	Transcription	KO:K02624===pcaR===IclR family transcriptional regulator, pca regulon regulatory protein	-1.80573
Ga0077592_10597	Ga0077592_10597	hypothetical protein				0	-1.80566
Ga0077592_1043115	Ga0077592_1043115	aldehyde dehydrogenase (NAD+)	COG1012	[C]	Energy production and conversion	KO:K00128===E1.2.1.3===aldehyde dehydrogenase (NAD+) [EC:1.2.1.3]	-1.80209
Ga0077592_10498	arsR	transcriptional regulator, ArsR family	COG0640	[K]	Transcription	KO:K03892===arsR===ArsR family transcriptional regulator	-1.80136
Ga0077592_103281	Ga0077592_103281	hypothetical protein	COG1960	[I]	Lipid transport and metabolism	KO:K00257===E1.3.99.-===	-1.79921
Ga0077592_108530	Ga0077592_108530	glycerophosphoryl diester phosphodiesterase	COG0584	[I]	Lipid transport and metabolism	KO:K01126===E3.1.4.46, glpQ, ugpQ===glycerophosphoryl diester phosphodiesterase [EC:3.1.4.46]	-1.79066
Ga0077592_11116	Ga0077592_11116	chromosome partitioning protein	COG1192	[N]	Cell motility	KO:K03496===parA, soj===chromosome partitioning protein	-1.78947
Ga0077592_105818	Ga0077592_105818	amino acid adenylation domain-containing protein	COG1020	[Q]	Secondary metabolites biosynthesis, transport, and catabolism	0	-1.78691
Ga0077592_113485	Ga0077592_113485	Uncharacterized membrane protein YccC	COG1289	[S]	Function unknown	0	-1.78661
Ga0077592_107131	trbC	type IV secretion system protein VirB2	COG3838	[U]	Intracellular trafficking, secretion, and vesicular transport	KO:K03197===virB2, lvhB2===type IV secretion system protein VirB2	-1.78601
Ga0077592_104966	Ga0077592_104966	N-carbamoyl-L-amino-acid hydrolase	COG0624	[E]	Amino acid transport and metabolism	KO:K06016===E3.5.1.87===N-carbamoyl-L-amino-acid hydrolase [EC:3.5.1.87]	-1.7854
Ga0077592_107123	Ga0077592_107123	hypothetical protein				0	-1.78513
Ga0077592_1032212	Ga0077592_1032212	Nucleoside-diphosphate-sugar epimerase	COG0451	[M]	Cell wall/membrane/envelope biogenesis	0	-1.78453
Ga0077592_108425	Ga0077592_108425	Sugar phosphate isomerase/epimerase	COG1082	[G]	Carbohydrate transport and metabolism	0	-1.78247
Ga0077592_1003313	Ga0077592_1003313	Response regulator receiver domain-containing protein	COG0745	[T]	Signal transduction mechanisms	0	-1.78145
Ga0077592_1092140	Ga0077592_1092140	hypothetical protein				0	-1.78037
Ga0077592_1003121	Ga0077592_1003121	hypothetical protein				0	-1.77888
Ga0077592_1154149	dctA_2	aerobic C4-dicarboxylate transport protein	COG1301	[C]	Energy production and conversion	KO:K11103===dctA===aerobic C4-dicarboxylate transport protein	-1.77773
Ga0077592_10364	paaB	ring-1,2-phenylacetyl-CoA epoxidase subunit PaaB	COG3460	[Q]	Secondary metabolites biosynthesis, transport, and catabolism	KO:K02610===paaB===ring-1,2-phenylacetyl-CoA epoxidase subunit PaaB	-1.77284
Ga0077592_104570	Ga0077592_104570	Predicted Fe2+/Mn2+ transporter, VIT1/CCC1 family	COG1814	[P]	Inorganic ion transport and metabolism	0	-1.77237
Ga0077592_10819	gcvP	glycine dehydrogenase	COG1003	[E]	Amino acid transport and metabolism	KO:K00281===GLDC, gcvP===glycine dehydrogenase [EC:1.4.4.2]	-1.76929
Ga0077592_100940	Ga0077592_100940	transposase				KO:K07484===K07484===transposase	-1.76718
Ga0077592_108496	Ga0077592_108496	Permease of the drug/metabolite transporter (DMT) superfamily	COG0697	[E]	Amino acid transport and metabolism	0	-1.76578
Ga0077592_1056101	typA	GTP-binding protein	COG1217	[T]	Signal transduction mechanisms	KO:K06207===typA, bipA===GTP-binding protein	-1.76488
Ga0077592_1032128	Ga0077592_1032128	hypothetical protein				0	-1.76409
Ga0077592_105695	Ga0077592_105695	Putative transposase of IS4/5 family (DUF4096)				0	-1.7622
Ga0077592_10985	asnC_6	transcriptional regulator, AsnC family	COG1522	[K]	Transcription	KO:K03719===lrp===Lrp/AsnC family transcriptional regulator, leucine-responsive regulatory protein	-1.75749
Ga0077592_101262	Ga0077592_101262	Phenylpropionate dioxygenase, large terminal subunit	COG4638	[R]	General function prediction only	0	-1.75683
Ga0077592_1012113	Ga0077592_1012113	L-alanine-DL-glutamate epimerase	COG4948	[M]	Cell wall/membrane/envelope biogenesis	0	-1.75461
Ga0077592_110971	rpoA	DNA-directed RNA polymerase subunit alpha	COG0202	[K]	Transcription	KO:K03040===rpoA===DNA-directed RNA polymerase subunit alpha [EC:2.7.7.6]	-1.75344
Ga0077592_107118	Ga0077592_107118	Protein of unknown function (DUF2761)				0	-1.75289
Ga0077592_1003278	Ga0077592_1003278	cation diffusion facilitator family transporter	COG0053	[P]	Inorganic ion transport and metabolism	0	-1.74928
Ga0077592_106538	Ga0077592_106538	amino acid/amide ABC transporter substrate-binding protein, HAAT family	COG0683	[E]	Amino acid transport and metabolism	KO:K01999===livK===branched-chain amino acid transport system substrate-binding protein	-1.74922
Ga0077592_101036	pnp	polyribonucleotide nucleotidyltransferase	COG1185	[J]	Translation, ribosomal structure and biogenesis	KO:K00962===pnp, PNPT1===polyribonucleotide nucleotidyltransferase [EC:2.7.7.8]	-1.74889
Ga0077592_103788	Ga0077592_103788	aldehyde dehydrogenase (acceptor)	COG1012	[C]	Energy production and conversion	KO:K00128===E1.2.1.3===aldehyde dehydrogenase (NAD+) [EC:1.2.1.3]	-1.74847
Ga0077592_1045272	Ga0077592_1045272	DNA-binding transcriptional regulator, LysR family	COG0583	[K]	Transcription	0	-1.74421
Ga0077592_112140	Ga0077592_112140	glutamate dehydrogenase (NAD)	COG2902	[E]	Amino acid transport and metabolism	KO:K15371===GDH2===glutamate dehydrogenase [EC:1.4.1.2]	-1.74259
Ga0077592_107134	Ga0077592_107134	type IV secretion system protein VirB5	COG3701	[U]	Intracellular trafficking, secretion, and vesicular transport	KO:K03200===virB5, lvhB5===type IV secretion system protein VirB5	-1.74119
Ga0077592_102932	Ga0077592_102932	hypothetical protein				0	-1.7371
Ga0077592_111030	Ga0077592_111030	hypothetical protein				0	-1.73435
Ga0077592_105859	Ga0077592_105859	fatty-acyl-CoA synthase	COG0318	[I]	Lipid transport and metabolism	KO:K00666===K00666===fatty-acyl-CoA synthase [EC:6.2.1.-]	-1.73396
Ga0077592_110935	thiG	thiazole synthase	COG2022	[H]	Coenzyme transport and metabolism	KO:K03149===thiG===thiazole synthase [EC:2.8.1.10]	-1.73387
Ga0077592_113487	lysR_78	DNA-binding transcriptional regulator, LysR family	COG0583	[K]	Transcription	0	-1.73272
Ga0077592_111525	Ga0077592_111525	H+/Cl- antiporter ClcA	COG0038	[P]	Inorganic ion transport and metabolism	0	-1.73098
Ga0077592_10176	Ga0077592_10176	D-amino-acid dehydrogenase	COG0665	[E]	Amino acid transport and metabolism	KO:K00285===dadA===D-amino-acid dehydrogenase [EC:1.4.99.-]	-1.72774
Ga0077592_111925	Ga0077592_111925	alpha-ribazole phosphatase	COG0406	[G]	Carbohydrate transport and metabolism	KO:K02226===cobC2, cobC, phpB===alpha-ribazole phosphatase [EC:3.1.3.73]	-1.72723
Ga0077592_107116	Ga0077592_107116	chromosome partitioning protein	COG1192	[N]	Cell motility	KO:K03496===parA, soj===chromosome partitioning protein	-1.72699
Ga0077592_109749	Ga0077592_109749	glutathione S-transferase	COG0625	[O]	Post-translational modification, protein turnover, and chaperones	KO:K00799===GST, gst===glutathione S-transferase [EC:2.5.1.18]	-1.72572
Ga0077592_101234	Ga0077592_101234	nucleoside-binding protein	COG1744	[M]	Cell wall/membrane/envelope biogenesis	KO:K02058===ABC.SS.S===simple sugar transport system substrate-binding protein	-1.72218
Ga0077592_109647	Ga0077592_109647	hypothetical protein				0	-1.72076
Ga0077592_110930	Ga0077592_110930	phospholipid-binding lipoprotein MlaA	COG285	[M]	Cell wall/membrane/envelope biogenesis	KO:K04754===mlaA, vacJ===phospholipid-binding lipoprotein MlaA	-1.71966
Ga0077592_1010117	Ga0077592_1010117	Glycosyltransferase involved in cell wall bisynthesis	COG0438	[M]	Cell wall/membrane/envelope biogenesis	0	-1.71936
Ga0077592_108485	Ga0077592_108485	Fusaric acid resistance protein family protein				0	-1.71713
Ga0077592_1092130	Ga0077592_1092130	chromosome partitioning protein	COG1192	[N]	Cell motility	KO:K03496===parA, soj===chromosome partitioning protein	-1.71675
Ga0077592_105847	Ga0077592_105847	hypothetical protein				0	-1.71663
Ga0077592_1073229	Ga0077592_1073229	N-acyl-D-amino-acid deacylase	COG3653	[Q]	Secondary metabolites biosynthesis, transport, and catabolism	KO:K06015===E3.5.1.81===N-acyl-D-amino-acid deacylase [EC:3.5.1.81]	-1.71581
Ga0077592_106526	atpF	ATP synthase F0 subcomplex B subunit	COG0711	[C]	Energy production and conversion	KO:K02109===ATPF0B, atpF===F-type H+-transporting ATPase subunit b	-1.7112
Ga0077592_105521	Ga0077592_105521	CubicO group peptidase, beta-lactamase class C family	COG1680	[V]	Defense mechanisms	0	-1.71104
Ga0077592_101319	Ga0077592_101319	Predicted arabinose efflux permease, MFS family	COG2814	[G]	Carbohydrate transport and metabolism	0	-1.7087
Ga0077592_106511	Ga0077592_106511	amino acid/amide ABC transporter substrate-binding protein, HAAT family	COG0683	[E]	Amino acid transport and metabolism	KO:K01999===livK===branched-chain amino acid transport system substrate-binding protein	-1.70824
Ga0077592_104920	Ga0077592_104920	3-methylcrotonyl-CoA carboxylase beta subunit	COG4799	[I]	Lipid transport and metabolism	KO:K01969===E6.4.1.4B===3-methylcrotonyl-CoA carboxylase beta subunit [EC:6.4.1.4]	-1.70783
Ga0077592_111951	Ga0077592_111951	Uncharacterized conserved protein, DUF934 family	COG3749	[S]	Function unknown	0	-1.70637
Ga0077592_1045514	Ga0077592_1045514	Cd2+/Zn2+-exporting ATPase	COG2217	[P]	Inorganic ion transport and metabolism	KO:K01534===zntA===Cd2+/Zn2+-exporting ATPase [EC:3.6.3.3 3.6.3.5]	-1.70616
Ga0077592_102934	Ga0077592_102934	carbohydrate ABC transporter membrane protein 1, CUT1 family	COG1175	[G]	Carbohydrate transport and metabolism	KO:K02025===ABC.MS.P===multiple sugar transport system permease protein	-1.70559
Ga0077592_1012127	dctP	tripartite ATP-independent transporter solute receptor, DctP family	COG1638	[G]	Carbohydrate transport and metabolism	0	-1.70553
Ga0077592_105655	Ga0077592_105655	serine/threonine-protein kinase HipA	COG3550	[T]	Signal transduction mechanisms	KO:K07154===hipA===serine/threonine-protein kinase HipA [EC:2.7.11.1]	-1.70404
Ga0077592_1056142	Ga0077592_1056142	Protein of unknown function (DUF3563)				0	-1.69896
Ga0077592_101034	tpiA	triosephosphate isomerase	COG0149	[G]	Carbohydrate transport and metabolism	KO:K01803===TPI, tpiA===triosephosphate isomerase (TIM) [EC:5.3.1.1]	-1.6925
Ga0077592_11104	Ga0077592_11104	NADH-FMN oxidoreductase RutF, flavin reductase (DIM6/NTAB) family	COG1853	[C]	Energy production and conversion	0	-1.69162
Ga0077592_109645	thiC	hydroxymethylpyrimidine synthase	COG0422	[H]	Coenzyme transport and metabolism	KO:K03147===thiC===phosphomethylpyrimidine synthase [EC:4.1.99.17]	-1.68839
Ga0077592_1097242	Ga0077592_1097242	DNA-binding transcriptional regulator, LysR family	COG0583	[K]	Transcription	0	-1.68712
Ga0077592_10988	Ga0077592_10988	indolepyruvate ferredoxin oxidoreductase	COG4231	[C]	Energy production and conversion	KO:K04090===E1.2.7.8===indolepyruvate ferredoxin oxidoreductase [EC:1.2.7.8]	-1.68394
Ga0077592_1092100	Ga0077592_1092100	transcriptional regulator, MerR family	COG0789	[K]	Transcription	KO:K08365===merR===MerR family transcriptional regulator, mercuric resistance operon regulatory protein	-1.68387
Ga0077592_104919	BCAM2433	isovaleryl-CoA dehydrogenase	COG1960	[I]	Lipid transport and metabolism	KO:K00253===IVD, ivd===isovaleryl-CoA dehydrogenase [EC:1.3.8.4]	-1.68373
Ga0077592_106430	Ga0077592_106430	NADH dehydrogenase subunit M	COG1008	[C]	Energy production and conversion	KO:K00342===nuoM===NADH-quinone oxidoreductase subunit M [EC:1.6.5.3]	-1.68243
Ga0077592_1045447	Ga0077592_1045447	L-ascorbate metabolism protein UlaG, beta-lactamase superfamily	COG2220	[G]	Carbohydrate transport and metabolism	0	-1.682
Ga0077592_11238	Ga0077592_11238	hypothetical protein				0	-1.68068
Ga0077592_101637	Ga0077592_101637	hypothetical protein				0	-1.67525
Ga0077592_1154118	Ga0077592_1154118	Uncharacterized protein YhaN	COG4717	[S]	Function unknown	0	-1.67522
Ga0077592_1097121	Ga0077592_1097121	Glycine/D-amino acid oxidase (deaminating)	COG0665	[E]	Amino acid transport and metabolism	0	-1.67191
Ga0077592_1097279	Ga0077592_1097279	ABC-2 type transport system permease protein	COG0842	[V]	Defense mechanisms	KO:K01992===ABC-2.P===ABC-2 type transport system permease protein	-1.66718
Ga0077592_101365	Ga0077592_101365	hypothetical protein				0	-1.66661
Ga0077592_10427	rpsR	SSU ribosomal protein S18P	COG0238	[J]	Translation, ribosomal structure and biogenesis	KO:K02963===RP-S18, MRPS18, rpsR===small subunit ribosomal protein S18	-1.66658
Ga0077592_115443	Ga0077592_115443	hydroxybutyrate-dimer hydrolase				KO:K07518===E3.1.1.22===hydroxybutyrate-dimer hydrolase [EC:3.1.1.22]	-1.66365
Ga0077592_10282	Ga0077592_10282	alkylhydroperoxidase AhpD family core domain-containing protein				0	-1.66284
Ga0077592_11066	Ga0077592_11066	outer membrane protein OmpU	COG3203	[M]	Cell wall/membrane/envelope biogenesis	KO:K08720===ompU===outer membrane protein OmpU	-1.66261
Ga0077592_11532	Ga0077592_11532	hypothetical protein				0	-1.66242
Ga0077592_109748	Ga0077592_109748	methionine synthase (B12-independent)	COG0620	[E]	Amino acid transport and metabolism	KO:K00549===metE===5-methyltetrahydropteroyltriglutamate--homocysteine methyltransferase [EC:2.1.1.14]	-1.65947
Ga0077592_1073271	pth	peptidyl-tRNA hydrolase	COG0193	[J]	Translation, ribosomal structure and biogenesis	KO:K01056===PTH1, pth, spoVC===peptidyl-tRNA hydrolase, PTH1 family [EC:3.1.1.29]	-1.65813
Ga0077592_111241	Ga0077592_111241	hypothetical protein				0	-1.65707
Ga0077592_107140	Ga0077592_107140	type IV secretion system protein TrbL	COG3846	[U]	Intracellular trafficking, secretion, and vesicular transport	KO:K03201===virB6, lvhB6===type IV secretion system protein VirB6<<>>KO:K07344===trbL===type IV secretion system protein TrbL	-1.65679
Ga0077592_111926	cobS	cobalamin-5'-phosphate synthase	COG0368	[H]	Coenzyme transport and metabolism	KO:K02233===E2.7.8.26, cobS, cobV===adenosylcobinamide-GDP ribazoletransferase [EC:2.7.8.26]	-1.65619
Ga0077592_1073210	Ga0077592_1073210	hypothetical protein	COG1960	[I]	Lipid transport and metabolism	KO:K00257===E1.3.99.-===	-1.65564
Ga0077592_113244	Ga0077592_113244	NAD+ synthase (glutamine-hydrolysing)	COG0171	[H]	Coenzyme transport and metabolism	KO:K01950===E6.3.5.1, NADSYN1, QNS1, nadE===NAD+ synthase (glutamine-hydrolysing) [EC:6.3.5.1]	-1.65512
Ga0077592_111821	Ga0077592_111821	MFS transporter, CP family, cyanate transporter	COG2807	[P]	Inorganic ion transport and metabolism	KO:K03449===MFS.CP===MFS transporter, CP family, cyanate transporter	-1.65506
Ga0077592_101745	Ga0077592_101745	2-keto-4-pentenoate hydratase	COG3971	[Q]	Secondary metabolites biosynthesis, transport, and catabolism	0	-1.6546
Ga0077592_1084214	Ga0077592_1084214					#N/A	-1.65373
Ga0077592_109260	Ga0077592_109260	conjugal transfer pilus assembly protein TrbC				KO:K12059===trbC===conjugal transfer pilus assembly protein TrbC	-1.64692
Ga0077592_10714	Ga0077592_10714	conjugative transfer signal peptidase TraF	COG495	[U]	Intracellular trafficking, secretion, and vesicular transport	0	-1.64541
Ga0077592_1092101	Ga0077592_1092101	mercuric ion transport protein				KO:K08363===merT===mercuric ion transport protein	-1.64366
Ga0077592_1119109	Ga0077592_1119109	hypothetical protein				0	-1.6425
Ga0077592_1085123	Ga0077592_1085123	Uncharacterized membrane-anchored protein YjiN, DUF445 family	COG2733	[S]	Function unknown	0	-1.6424
Ga0077592_1045228	Ga0077592_1045228	transcriptional regulator, GntR family	COG2188	[K]	Transcription	KO:K03710===K03710===GntR family transcriptional regulator	-1.64195
Ga0077592_11323	BPSL2502	D-methionine transport system permease protein	COG2011	[E]	Amino acid transport and metabolism	KO:K02072===metI===D-methionine transport system permease protein	-1.64157
Ga0077592_10425	rpsF	SSU ribosomal protein S6P	COG0360	[J]	Translation, ribosomal structure and biogenesis	KO:K02990===RP-S6, MRPS6, rpsF===small subunit ribosomal protein S6	-1.64127
Ga0077592_101010	Ga0077592_101010	Enoyl-CoA hydratase/carnithine racemase	COG1024	[I]	Lipid transport and metabolism	0	-1.64059
Ga0077592_110970	rplQ	LSU ribosomal protein L17P	COG0203	[J]	Translation, ribosomal structure and biogenesis	KO:K02879===RP-L17, MRPL17, rplQ===large subunit ribosomal protein L17	-1.64045
Ga0077592_1118122	azlC	4-azaleucine resistance probable transporter AzlC	COG1296	[E]	Amino acid transport and metabolism	0	-1.63949
Ga0077592_1016171	Ga0077592_1016171	pyruvate dehydrogenase E2 component (dihydrolipoamide acetyltransferase)	COG0596	[H]	Coenzyme transport and metabolism	KO:K00627===DLAT, aceF, pdhC===pyruvate dehydrogenase E2 component (dihydrolipoamide acetyltransferase) [EC:2.3.1.12]	-1.63714
Ga0077592_106416	Ga0077592_106416	peptide/nickel transport system permease protein	COG1173	[E]	Amino acid transport and metabolism	KO:K02034===ABC.PE.P1===peptide/nickel transport system permease protein	-1.63627
Ga0077592_107110	Ga0077592_107110	CobQ/CobB/MinD/ParA nucleotide binding domain-containing protein				0	-1.6308
Ga0077592_112536	rdgC	recombination associated protein RdgC	COG2974	[L]	Replication, recombination and repair	KO:K03554===rdgC===recombination associated protein RdgC	-1.63025
Ga0077592_109257	Ga0077592_109257	conjugal transfer pilus assembly protein TraE				KO:K12067===traE===conjugal transfer pilus assembly protein TraE	-1.62559
Ga0077592_1097229	Ga0077592_1097229	Protein of unknown function (DUF1045)				0	-1.62433
Ga0077592_111812	Ga0077592_111812	Crotonobetainyl-CoA:carnitine CoA-transferase CaiB	COG1804	[I]	Lipid transport and metabolism	0	-1.62343
Ga0077592_11252	lysR_74	DNA-binding transcriptional regulator, LysR family	COG0583	[K]	Transcription	0	-1.62225
Ga0077592_107130	trbB	type IV secretion system protein VirB11	COG4962	[W]	Extracellular structures	KO:K03196===virB11, lvhB11===type IV secretion system protein VirB11	-1.62165
Ga0077592_104231	Ga0077592_104231	putrescine transport system substrate-binding protein	COG0687	[E]	Amino acid transport and metabolism	KO:K11073===potF===putrescine transport system substrate-binding protein	-1.62101
Ga0077592_100341	Ga0077592_100341	cellulose biosynthesis protein BcsE				0	-1.61943
Ga0077592_1045143	motB_2	Flagellar motor protein MotB	COG1360	[N]	Cell motility	0	-1.61754
Ga0077592_109833	Ga0077592_109833	putative Mg2+ transporter-C (MgtC) family protein				KO:K07507===mgtC===putative Mg2+ transporter-C (MgtC) family protein	-1.61722
Ga0077592_1092105	Ga0077592_1092105	alkylmercury lyase				KO:K00221===E4.99.1.2===alkylmercury lyase [EC:4.99.1.2]	-1.61715
Ga0077592_103452	Ga0077592_103452	CBS domain-containing protein				KO:K07168===K07168===CBS domain-containing membrane protein	-1.6171
Ga0077592_107128	ssb2	single-strand DNA-binding protein	COG0629	[L]	Replication, recombination and repair	KO:K03111===ssb===single-strand DNA-binding protein	-1.6166
Ga0077592_10491	Ga0077592_10491	2-aminoethylphosphonate transport system substrate-binding protein	COG1840	[P]	Inorganic ion transport and metabolism	KO:K11081===phnS===2-aminoethylphosphonate transport system substrate-binding protein	-1.61404
Ga0077592_1073506	Ga0077592_1073506	Transposase	COG4584	[X]	Mobilome: prophages, transposons	0	-1.61046
Ga0077592_1065102	Ga0077592_1065102	amino acid/polyamine/organocation transporter, APC superfamily	COG0531	[E]	Amino acid transport and metabolism	KO:K03294===TC.APA===basic amino acid/polyamine antiporter, APA family	-1.61044
Ga0077592_101048	Ga0077592_101048	hypothetical protein				0	-1.60988
Ga0077592_1045302	Ga0077592_1045302	monosaccharide ABC transporter ATP-binding protein, CUT2 family	COG1129	[G]	Carbohydrate transport and metabolism	KO:K02056===ABC.SS.A===simple sugar transport system ATP-binding protein [EC:3.6.3.17]	-1.60927
Ga0077592_1073199	Ga0077592_1073199	glutamate dehydrogenase (NAD(P)+)	COG0334	[E]	Amino acid transport and metabolism	KO:K00261===GLUD1_2, gdhA===glutamate dehydrogenase (NAD(P)+) [EC:1.4.1.3]	-1.60885
Ga0077592_104555	Ga0077592_104555	protein of unknown function (DUF4410)				0	-1.60796
Ga0077592_11407	pheT	phenylalanyl-tRNA synthetase beta subunit	COG0072	[J]	Translation, ribosomal structure and biogenesis	KO:K01890===FARSB, pheT===phenylalanyl-tRNA synthetase beta chain [EC:6.1.1.20]	-1.60749
Ga0077592_105861	Ga0077592_105861	aromatic amino acid:proton symporter, AAT family	COG1113	[E]	Amino acid transport and metabolism	KO:K11734===aroP===aromatic amino acid transport protein AroP<<>>KO:K03293===TC.AAT===amino acid transporter, AAT family	-1.60724
Ga0077592_1045123	Ga0077592_1045123	N-carbamoyl-L-amino-acid hydrolase	COG0624	[E]	Amino acid transport and metabolism	KO:K06016===E3.5.1.87===N-carbamoyl-L-amino-acid hydrolase [EC:3.5.1.87]	-1.607
Ga0077592_1045120	Ga0077592_1045120	amino acid/amide ABC transporter membrane protein 2, HAAT family	COG417	[E]	Amino acid transport and metabolism	KO:K01998===livM===branched-chain amino acid transport system permease protein	-1.60657
Ga0077592_1073187	rpsI	SSU ribosomal protein S9P	COG0103	[J]	Translation, ribosomal structure and biogenesis	KO:K02996===RP-S9, MRPS9, rpsI===small subunit ribosomal protein S9	-1.60534
Ga0077592_101017	Ga0077592_101017	Protein of unknown function (DUF2818)				0	-1.6046
Ga0077592_109734	sdhA_2	succinate dehydrogenase subunit A	COG1053	[C]	Energy production and conversion	KO:K00239===sdhA, frdA===succinate dehydrogenase / fumarate reductase, flavoprotein subunit [EC:1.3.5.1 1.3.5.4]	-1.59888
Ga0077592_115452	Ga0077592_115452	Predicted arabinose efflux permease, MFS family	COG281	[G]	Carbohydrate transport and metabolism	0	-1.59601
Ga0077592_1045221	Ga0077592_1045221	bile acid:Na+ symporter, BASS family	COG0385	[R]	General function prediction only	KO:K03453===TC.BASS===bile acid:Na+ symporter, BASS family	-1.59562
Ga0077592_1045373	Ga0077592_1045373	DNA-binding transcriptional regulator, PadR family	COG1695	[K]	Transcription	0	-1.59489
Ga0077592_107291	Ga0077592_107291	Glutathione S-transferase	COG0625	[O]	Post-translational modification, protein turnover, and chaperones	0	-1.59484
Ga0077592_107294	Ga0077592_107294	Transglutaminase-like enzyme, putative cysteine protease	COG1305	[O]	Post-translational modification, protein turnover, and chaperones	0	-1.59477
Ga0077592_1115136	Ga0077592_1115136	membrane fusion protein, multidrug efflux system	COG084	[M]	Cell wall/membrane/envelope biogenesis	KO:K18901===bpeE===membrane fusion protein, multidrug efflux system	-1.59432
Ga0077592_106414	Ga0077592_106414	2Fe-2S iron-sulfur cluster binding domain-containing protein				0	-1.5941
Ga0077592_1073503	Ga0077592_1073503	protein of unknown function (DUF4102)				0	-1.5908
Ga0077592_108547	Ga0077592_108547	NitT/TauT family transport system permease protein	COG0600	[P]	Inorganic ion transport and metabolism	KO:K02050===ABC.SN.P===NitT/TauT family transport system permease protein	-1.59036
Ga0077592_1045110	Ga0077592_1045110	alcohol dehydrogenase (cytochrome c)	COG4993	[G]	Carbohydrate transport and metabolism	KO:K00114===exaA===alcohol dehydrogenase (cytochrome c) [EC:1.1.2.8]	-1.58964
Ga0077592_10453	Ga0077592_10453	hypothetical protein				0	-1.5893
Ga0077592_107317	Ga0077592_107317	S-formylglutathione hydrolase	COG0627	[V]	Defense mechanisms	KO:K01070===frmB, ESD, fghA===S-formylglutathione hydrolase [EC:3.1.2.12]	-1.5887
Ga0077592_1045127	Ga0077592_1045127	D-mannonate dehydratase	COG4948	[M]	Cell wall/membrane/envelope biogenesis	KO:K08323===rspA, manD===mannonate dehydratase [EC:4.2.1.8]	-1.58708
Ga0077592_101280	Ga0077592_101280	Acyl-CoA dehydrogenase	COG1960	[I]	Lipid transport and metabolism	0	-1.58707
Ga0077592_106575	Ga0077592_106575	efflux transporter, outer membrane factor (OMF) lipoprotein, NodT family	COG1538	[M]	Cell wall/membrane/envelope biogenesis	0	-1.58687
Ga0077592_10064	cysW	sulfate transport system permease protein	COG4208	[P]	Inorganic ion transport and metabolism	KO:K02047===cysW===sulfate transport system permease protein	-1.5836
Ga0077592_101049	Ga0077592_101049	Predicted arabinose efflux permease, MFS family	COG2814	[G]	Carbohydrate transport and metabolism	0	-1.58321
Ga0077592_101376	Ga0077592_101376	sarcosine oxidase subunit alpha	COG0404	[E]	Amino acid transport and metabolism	KO:K00302===soxA===sarcosine oxidase, subunit alpha [EC:1.5.3.1]	-1.58163
Ga0077592_104529	lysR_24	DNA-binding transcriptional regulator, LysR family	COG0583	[K]	Transcription	0	-1.58136
Ga0077592_105863	Ga0077592_105863	sulfonate transport system ATP-binding protein	COG1116	[P]	Inorganic ion transport and metabolism	KO:K15555===ssuB===sulfonate transport system ATP-binding protein [EC:3.6.3.-]	-1.58036
Ga0077592_105319	Ga0077592_105319	alpha/beta hydrolase fold				0	-1.57675
Ga0077592_1003363	Ga0077592_1003363					#N/A	-1.57588
Ga0077592_1097268	gntR_20	DNA-binding transcriptional regulator, GntR family	COG1802	[K]	Transcription	0	-1.57573
Ga0077592_101368	araC_3	Transcriptional regulator GlxA family, contains an amidase domain and an AraC-type DNA-binding HTH domain	COG4977	[K]	Transcription	0	-1.57542
Ga0077592_1056147	Ga0077592_1056147	protein ImuB	COG0389	[L]	Replication, recombination and repair	KO:K14161===imuB===protein ImuB	-1.57318
Ga0077592_11251	Ga0077592_11251	drug resistance transporter, EmrB/QacA subfamily				0	-1.57285
Ga0077592_1032169	Ga0077592_1032169	isoquinoline 1-oxidoreductase, alpha subunit	COG2080	[C]	Energy production and conversion	KO:K07302===E1.3.99.16A===isoquinoline 1-oxidoreductase, alpha subunit [EC:1.3.99.16]	-1.57165
Ga0077592_1073237	Ga0077592_1073237	Outer membrane protein (porin)	COG3203	[M]	Cell wall/membrane/envelope biogenesis	0	-1.57071
Ga0077592_1118123	Ga0077592_1118123	Branched-chain amino acid transport protein	COG4392	[E]	Amino acid transport and metabolism	0	-1.56963
Ga0077592_100610	uspA_1	Nucleotide-binding universal stress protein, UspA family	COG0589	[T]	Signal transduction mechanisms	0	-1.56873
Ga0077592_11405	rplT	LSU ribosomal protein L20P	COG0292	[J]	Translation, ribosomal structure and biogenesis	KO:K02887===RP-L20, MRPL20, rplT===large subunit ribosomal protein L20	-1.56438
Ga0077592_110999	rpsJ	SSU ribosomal protein S10P	COG0051	[J]	Translation, ribosomal structure and biogenesis	KO:K02946===RP-S10, MRPS10, rpsJ===small subunit ribosomal protein S10	-1.56436
Ga0077592_103311	Ga0077592_103311	Purine-cytosine permease	COG1457	[F]	Nucleotide transport and metabolism	0	-1.56347
Ga0077592_104564	Ga0077592_104564	carbohydrate ABC transporter substrate-binding protein, CUT1 family	COG1653	[G]	Carbohydrate transport and metabolism	KO:K02027===ABC.MS.S===multiple sugar transport system substrate-binding protein	-1.56313
Ga0077592_108574	Ga0077592_108574	drug resistance transporter, EmrB/QacA subfamily				0	-1.56292
Ga0077592_109294	Ga0077592_109294	arsenate reductase	COG1393	[P]	Inorganic ion transport and metabolism	KO:K00537===ARSC1, arsC===arsenate reductase [EC:1.20.4.1]	-1.56247
Ga0077592_100340	Ga0077592_100340	Tfp pilus assembly protein PilF	COG3063	[N]	Cell motility	0	-1.56244
Ga0077592_1092120	Ga0077592_1092120	putative toxin-antitoxin system antitoxin component, TIGR02293 family	COG5642	[S]	Function unknown	0	-1.5622
Ga0077592_1003268	Ga0077592_1003268	DNA-binding transcriptional regulator, LysR family	COG0583	[K]	Transcription	0	-1.56064
Ga0077592_1043193	Ga0077592_1043193	sodium/proton antiporter, CPA1 family	COG0025	[P]	Inorganic ion transport and metabolism	KO:K03316===TC.CPA1===monovalent cation:H+ antiporter, CPA1 family	-1.56005
Ga0077592_1016256	Ga0077592_1016256	hypothetical protein				0	-1.55969
Ga0077592_109265	Ga0077592_109265	Thiol:disulfide interchange protein DsbC	COG1651	[O]	Post-translational modification, protein turnover, and chaperones	KO:K03981===dsbC===thiol:disulfide interchange protein DsbC [EC:5.3.4.1]	-1.5573
Ga0077592_105685	Ga0077592_105685	acyl-CoA dehydrogenase	COG1960	[I]	Lipid transport and metabolism	KO:K06445===fadE===acyl-CoA dehydrogenase [EC:1.3.99.-]	-1.55636
Ga0077592_111988	lspA	signal peptidase II Aspartic peptidase. MEROPS family A08	COG0597	[M]	Cell wall/membrane/envelope biogenesis	KO:K03101===lspA===signal peptidase II [EC:3.4.23.36]	-1.55556
Ga0077592_10196	Ga0077592_10196	hypothetical protein				0	-1.55549
Ga0077592_1154150	gntR_32	transcriptional regulator, GntR family	COG2186	[K]	Transcription	KO:K05799===pdhR===GntR family transcriptional regulator, transcriptional repressor for pyruvate dehydrogenase complex	-1.55478
Ga0077592_1072131	Ga0077592_1072131	regulatory protein, lacI family				KO:K02529===lacI, galR===LacI family transcriptional regulator	-1.55354
Ga0077592_1140111	Ga0077592_1140111	Uncharacterized membrane protein	COG3748	[S]	Function unknown	0	-1.55315
Ga0077592_108556	nodT_3	efflux transporter, outer membrane factor (OMF) lipoprotein, NodT family	COG1538	[M]	Cell wall/membrane/envelope biogenesis	0	-1.55203
Ga0077592_1003346	Ga0077592_1003346	amino acid ABC transporter membrane protein 2, PAAT family	COG0765	[E]	Amino acid transport and metabolism	KO:K02029===ABC.PA.P===polar amino acid transport system permease protein	-1.5515
Ga0077592_103512	Ga0077592_103512	Pimeloyl-ACP methyl ester carboxylesterase	COG0596	[H]	Coenzyme transport and metabolism	0	-1.55112
Ga0077592_109251	Ga0077592_109251	hypothetical protein				0	-1.55006
Ga0077592_103436	Ga0077592_103436	hypothetical protein				0	-1.54892
Ga0077592_101025	Ga0077592_101025	NADH-quinone oxidoreductase subunit G	COG1034	[C]	Energy production and conversion	KO:K00336===nuoG===NADH-quinone oxidoreductase subunit G [EC:1.6.5.3]	-1.54878
Ga0077592_1045307	Ga0077592_1045307	aldehyde dehydrogenase (NAD+)	COG1012	[C]	Energy production and conversion	KO:K00128===E1.2.1.3===aldehyde dehydrogenase (NAD+) [EC:1.2.1.3]	-1.54773
Ga0077592_102515	Ga0077592_102515	hopanoid-associated phosphorylase				0	-1.54665
Ga0077592_1043103	Ga0077592_1043103	Pimeloyl-ACP methyl ester carboxylesterase	COG0596	[H]	Coenzyme transport and metabolism	0	-1.54619
Ga0077592_11326	Ga0077592_11326	Acetoin utilization deacetylase AcuC	COG0123	[B]	Chromatin structure and dynamics	0	-1.54605
Ga0077592_104311	Ga0077592_104311	nitrite reductase (NADH) large subunit	COG1251	[C]	Energy production and conversion	KO:K00362===nirB===nitrite reductase (NADH) large subunit [EC:1.7.1.15]	-1.54558
Ga0077592_1012152	Ga0077592_1012152	Protein of unknown function (DUF2889)				0	-1.54451
Ga0077592_107132	trbD	type IV secretion system protein VirB3	COG5268	[U]	Intracellular trafficking, secretion, and vesicular transport	KO:K03198===virB3, lvhB3===type IV secretion system protein VirB3	-1.54257
Ga0077592_1003200	Ga0077592_1003200	DNA-binding transcriptional regulator, LysR family	COG0583	[K]	Transcription	0	-1.54072
Ga0077592_114241	rpmA	LSU ribosomal protein L27P	COG0211	[J]	Translation, ribosomal structure and biogenesis	KO:K02899===RP-L27, MRPL27, rpmA===large subunit ribosomal protein L27	-1.5388
Ga0077592_1073166	Ga0077592_1073166	glutathione S-transferase	COG0625	[O]	Post-translational modification, protein turnover, and chaperones	KO:K00799===GST, gst===glutathione S-transferase [EC:2.5.1.18]	-1.5364
Ga0077592_101022	Ga0077592_101022	NADH-quinone oxidoreductase subunit J	COG0839	[C]	Energy production and conversion	KO:K00339===nuoJ===NADH-quinone oxidoreductase subunit J [EC:1.6.5.3]	-1.53638
Ga0077592_108110	Ga0077592_108110	Alginate lyase				0	-1.53623
Ga0077592_111965	argD_1	acetylornithine aminotransferase apoenzyme	COG4992	[E]	Amino acid transport and metabolism	KO:K00821===argD===acetylornithine/N-succinyldiaminopimelate aminotransferase [EC:2.6.1.11 2.6.1.17]	-1.53609
Ga0077592_1016162	Ga0077592_1016162	molybdate transport system substrate-binding protein	COG0725	[P]	Inorganic ion transport and metabolism	KO:K02020===modA===molybdate transport system substrate-binding protein	-1.53605
Ga0077592_11425	Ga0077592_11425	Outer membrane protein (porin)	COG3203	[M]	Cell wall/membrane/envelope biogenesis	0	-1.53504
Ga0077592_1016182	rpoD_1	RNA polymerase, sigma 70 subunit, RpoD	COG0568	[K]	Transcription	KO:K03086===SIG1, rpoD===RNA polymerase primary sigma factor	-1.53372
Ga0077592_1073323	Ga0077592_1073323	hypothetical protein	COG2960	[S]	Function unknown	KO:K09806===K09806===uncharacterized protein	-1.52938
Ga0077592_107142	Ga0077592_107142	Transglycosylase SLT domain-containing protein				0	-1.52792
Ga0077592_10739	Ga0077592_10739	sorbitol-binding protein /mannitol-binding protein	COG1653	[G]	Carbohydrate transport and metabolism	KO:K10227===smoE, mtlE===sorbitol/mannitol transport system substrate-binding protein	-1.52677
Ga0077592_1073431	Ga0077592_1073431	hypothetical protein				0	-1.52603
Ga0077592_1043100	Ga0077592_1043100	Glyoxylase, beta-lactamase superfamily II	COG049	[R]	General function prediction only	0	-1.52431
Ga0077592_1073494	Ga0077592_1073494	hypothetical protein	COG0759	[M]	Cell wall/membrane/envelope biogenesis	KO:K08998===K08998===uncharacterized protein	-1.52347
Ga0077592_1016137	Ga0077592_1016137	hypothetical protein				0	-1.52344
Ga0077592_10413	Ga0077592_10413	altronate hydrolase	COG2721	[G]	Carbohydrate transport and metabolism	KO:K01685===uxaA===altronate hydrolase [EC:4.2.1.7]	-1.51821
Ga0077592_101388	Ga0077592_101388	transposase				KO:K07483===K07483===transposase	-1.51636
Ga0077592_1003315	Ga0077592_1003315	two-component system, OmpR family, sensor histidine kinase BaeS	COG0642	[T]	Signal transduction mechanisms	KO:K07642===baeS, smeS===two-component system, OmpR family, sensor histidine kinase BaeS [EC:2.7.13.3]	-1.51405
Ga0077592_100911	Ga0077592_100911	protein of unknown function (DUF1840)				0	-1.51354
Ga0077592_101344	Ga0077592_101344	Protein of unknown function (DUF2471)				0	-1.51275
Ga0077592_1043202	Ga0077592_1043202	hypothetical protein				0	-1.51245
Ga0077592_107141	Ga0077592_107141	TrbM protein				0	-1.51115
Ga0077592_108421	lacI_7	DNA-binding transcriptional regulator, LacI/PurR family	COG1609	[K]	Transcription	0	-1.5098
Ga0077592_100347	Ga0077592_100347	outer membrane protein, multidrug efflux system	COG1538	[M]	Cell wall/membrane/envelope biogenesis	KO:K18139===oprM, emhC, ttgC, cusC, adeK, smeF, mtrE, cmeC, gesC===outer membrane protein, multidrug efflux system	-1.50928
Ga0077592_115464	Ga0077592_115464	NAD(P)-dependent dehydrogenase, short-chain alcohol dehydrogenase family	COG1028	[R]	General function prediction only	0	-1.50895
Ga0077592_1073159	Ga0077592_1073159	Polyisoprenoid-binding protein YceI	COG2353	[R]	General function prediction only	0	-1.50677
Ga0077592_1045280	Ga0077592_1045280	branched-chain amino acid transport system ATP-binding protein	COG4674	[R]	General function prediction only	KO:K01995===livG===branched-chain amino acid transport system ATP-binding protein	-1.5067
Ga0077592_1045144	Ga0077592_1045144	Protein of unknown function (DUF2894)				0	-1.50644
Ga0077592_11324	metN	D-methionine transport system ATP-binding protein	COG1135	[E]	Amino acid transport and metabolism	KO:K02071===metN===D-methionine transport system ATP-binding protein	-1.50378
Ga0077592_10552	acnA1	aconitase /2-methylcitrate dehydratase (trans-methylaconitate-forming)	COG1048	[C]	Energy production and conversion	KO:K01681===ACO, acnA===aconitate hydratase [EC:4.2.1.3]	-1.50314
Ga0077592_115482	Ga0077592_115482	hypothetical protein	COG1741	[R]	General function prediction only	KO:K06911===K06911===uncharacterized protein	-1.50229
Ga0077592_1016160	Ga0077592_1016160	Glutathione S-transferase	COG0625	[O]	Post-translational modification, protein turnover, and chaperones	0	-1.50157
Ga0077592_1032170	Ga0077592_1032170	transcriptional regulator, LysR family	COG0583	[K]	Transcription	KO:K03566===gcvA===LysR family transcriptional regulator, glycine cleavage system transcriptional activator	-1.50105
Ga0077592_107215	Ga0077592_107215	GAF domain-containing protein	COG0642	[T]	Signal transduction mechanisms	0	-1.50099
