# Supplementary material for: Transcriptional analysis reveals the metabolic state of Burkholderia zhejiangensis CEIB S4-3 during methyl parathion degradation
Source: PeerJ. 2019 Apr 24;7:e6822. doi: 10.7717/peerj.6822 (PMC6486813; doi:10.7717/peerj.6822)
Supplement: Supplemental Information 8 — The DGEs were used to locate the knockout (KO) genes. Later the KO numbers were analyzed in the Kyoto Encyclopedia of Genes and Genomes (KEGG) Pathway Color database to identify the metabolic pathways represented at the time 9 h in the experimental condition supplemented with the MP. Data were used to construct Fig. 6 and for Discussion section. [file peerj-07-6822-s008.xlsx]

## Sheet: Metabolic pathways time 9h MP
Table S8. Metabolic pathways corresponding to the time nine hours with MP
Locus_tag	Protein name; KO number	Function	log2 Fold Change
	Energy metabolism
Ga0077592_101025	NADH-quinone oxidoreductase subunit G [EC:1.6.5.3]; K00336	Oxidative phosphorylation	1.54878
Ga0077592_101024	NADH-quinone oxidoreductase subunit H [EC:1.6.5.3]; K00337	Oxidative phosphorylation	1.87454
Ga0077592_101022	NADH-quinone oxidoreductase subunit J [EC:1.6.5.3]; K00339	Oxidative phosphorylation	1.53638
Ga0077592_101020	NADH-quinone oxidoreductase subunit L [EC:1.6.5.3]; K00341	Oxidative phosphorylation	2.17643
Ga0077592_101019	NADH-quinone oxidoreductase subunit M [EC:1.6.5.3]; K00342	Oxidative phosphorylation	1.85798
Ga0077592_101018	NADH-quinone oxidoreductase subunit N [EC:1.6.5.3]; K00343	Oxidative phosphorylation	2.05679
Ga0077592_111950	Phosphoadenosine phosphosulfate reductase [EC:1.8.4.8]; K00390	Sulfur metabolism	1.8971
Ga0077592_111591	Cytochrome d ubiquinol oxidase subunit I [EC:1.10.3.-]; K00425	Oxidative phosphorylation	3.06531
Ga0077592_111592	Cytochrome d ubiquinol oxidase subunit II [EC:1.10.3.-]; K00426	Oxidative phosphorylation	3.68263
Ga0077592_106428	NADH dehydrogenase [EC:1.6.99.3]; K03885	Oxidative phosphorylation	2.24997
Ga0077592_105863	Sulfonate transport system ATP-binding protein [EC:3.6.3.-]; K15555	Sulfur metabolism	1.58036
Ga0077592_106526	F-type H+-transporting ATPase subunit b; K02109	Oxidative phosphorylation	1.7112
Ga0077592_106524	F-type H+-transporting ATPase subunit alpha [EC:3.6.3.14]; K02111	Oxidative phosphorylation	2.41536
Ga0077592_106522	F-type H+-transporting ATPase subunit beta [EC:3.6.3.14]; K02112	Oxidative phosphorylation	2.36946
Ga0077592_106525	F-type H+-transporting ATPase subunit delta; K02113	Oxidative phosphorylation	2.2235
Ga0077592_106521	F-type H+-transporting ATPase subunit epsilon; K02114	Oxidative phosphorylation	2.39582
Ga0077592_106523	F-type H+-transporting ATPase subunit gamma; K02115	Oxidative phosphorylation	2.35873
Ga0077592_107250	Cytochrome o ubiquinol oxidase subunit II [EC:1.10.3.-]; K02297	Oxidative phosphorylation	2.24056
Ga0077592_107249	Cytochrome o ubiquinol oxidase subunit I [EC:1.10.3.-]; K02298	Oxidative phosphorylation	2.9457
Ga0077592_107248	Cytochrome o ubiquinol oxidase subunit III [EC:1.10.3.-]; K02299	Oxidative phosphorylation	3.05519
Ga0077592_107247	Cytochrome o ubiquinol oxidase operon protein cyoD; K02300	Oxidative phosphorylation	3.00567
Ga0077592_10064	Sulfate transport system permease protein; K02047	Sulfur metabolism	1.5836
Ga0077592_104311	Nitrite reductase (NADH) large subunit [EC:1.7.1.15]; K00362	Nitrogen metabolism	1.54558
Ga0077592_104312	Nitrite reductase (NADH) small subunit [EC:1.7.1.15]; K00363	Nitrogen metabolism	3.10855
Ga0077592_107258	Nitronate monooxygenase [EC:1.13.12.16]; K00459	Nitrogen metabolism	2.62691
	Carbohydrate metabolism
Ga0077592_107318	S-(hydroxymethyl)glutathione dehydrogenase / alcohol dehydrogenase [EC:1.1.1.284 1.1.1.1]; K00121	Glycolysis / Gluconeogenesis	1.98291
Ga0077592_113232	Formate dehydrogenase major subunit [EC:1.2.1.2]; K00123	Glyoxylate and dicarboxylate metabolism	2.31889
Ga0077592_113233	Formate dehydrogenase subunit delta [EC:1.2.1.2]; K00126	Glyoxylate and dicarboxylate metabolism	2.28716
Ga0077592_106421	Aldehyde dehydrogenase (NAD+) [EC:1.2.1.3]; K00128	Glycolysis / Gluconeogenesis	4.24987
Ga0077592_1154151	Glyceraldehyde 3-phosphate dehydrogenase [EC:1.2.1.12]; K00134	Glycolysis / Gluconeogenesis	2.02235
Ga0077592_113413	Pyruvate dehydrogenase E1 component [EC:1.2.4.1]; K00163	Glycolysis / Gluconeogenesis	1.83827
Ga0077592_109734	Succinate dehydrogenase / fumarate reductase, flavoprotein subunit [EC:1.3.5.1 1.3.5.4]; K00239	Citrate cycle (TCA cycle)	1.59888
Ga0077592_10478	Succinate dehydrogenase / fumarate reductase, iron-sulfur subunit [EC:1.3.5.1 1.3.5.4]; K00240	Citrate cycle (TCA cycle)	4.64811
Ga0077592_10475	Succinate dehydrogenase / fumarate reductase, cytochrome b subunit; K00241	Citrate cycle (TCA cycle)	3.13167
Ga0077592_10476	Succinate dehydrogenase / fumarate reductase, membrane anchor subunit; K00242	Citrate cycle (TCA cycle)	3.88003
Ga0077592_10819	Glycine dehydrogenase [EC:1.4.4.2]; K00281	Glycolysis / Gluconeogenesis	1.76929
Ga0077592_1016171	Pyruvate dehydrogenase E2 component (dihydrolipoamide acetyltransferase) [EC:2.3.1.12]; K00627	Glycolysis / Gluconeogenesis	1.63714
Ga0077592_107317	S-formylglutathione hydrolase [EC:3.1.2.12]; K01070	Glycolysis / Gluconeogenesis	1.5887
Ga0077592_115443	Hydroxybutyrate-dimer hydrolase [EC:3.1.1.22]; K07518	Butanoate metabolism	1.66365
Ga0077592_1045127	Mannonate dehydratase [EC:4.2.1.8]; K08323	Pentose and glucuronate interconversions	1.58708
Ga0077592_112134	Succinyl-CoA:acetate CoA-transferase [EC:2.8.3.18]; K18118	Citrate cycle (TCA cycle)	2.95938
Ga0077592_1043200	L-fuconate dehydratase [EC:4.2.1.68]; K18334	Fructose and mannose metabolism	3.1367
Ga0077592_109731	Citrate synthase [EC:2.3.3.1]; K01647	Citrate cycle (TCA cycle)	2.11165
Ga0077592_103323	Aconitate hydratase [EC:4.2.1.3]; K01681	Citrate cycle (TCA cycle)	1.92158
Ga0077592_100328	Aconitate hydratase 2 / 2-methylisocitrate dehydratase [EC:4.2.1.3 4.2.1.99]; K01682	Citrate cycle (TCA cycle)	3.75754
Ga0077592_104548	Aldose 1-epimerase [EC:5.1.3.3]; K01785	Glycolysis / Gluconeogenesis	1.83246
Ga0077592_101034	Triosephosphate isomerase (TIM) [EC:5.3.1.1]; K01803	Glycolysis / Gluconeogenesis	1.6925
Ga0077592_103798	Succinyl-CoA synthetase beta subunit [EC:6.2.1.5]; K01903	Citrate cycle (TCA cycle)	2.3344
Ga0077592_1043123	Xylulose-5-phosphate/fructose-6-phosphate phosphoketolase [EC:4.1.2.9 4.1.2.22]; K01621	Pentose phosphate pathway	2.12932
Ga0077592_11061	Formyltetrahydrofolate deformylase [EC:3.5.1.10]; K01433	Glyoxylate and dicarboxylate metabolism	2.73511
Ga0077592_103274	Oxalyl-CoA decarboxylase [EC:4.1.1.8]; K01577	Glyoxylate and dicarboxylate metabolism	2.29488
Ga0077592_10423	Tartronate-semialdehyde synthase [EC:4.1.1.47]; K01608	Glyoxylate and dicarboxylate metabolism	2.91612
Ga0077592_112822	Isocitrate lyase [EC:4.1.3.1]; K01637	Glyoxylate and dicarboxylate metabolism	2.46239
Ga0077592_1016212	Phosphoenolpyruvate carboxylase [EC:4.1.1.31]; K01595	Pyruvate metabolism	1.8105
Ga0077592_1003322	Propionate CoA-transferase [EC:2.8.3.1]; K01026	Pyruvate metabolism	1.86374
Ga0077592_10413	Altronate hydrolase [EC:4.2.1.7]; K01685	Pentose and glucuronate interconversions	1.51821
Ga0077592_1045328	Glucarate dehydratase [EC:4.2.1.40]; K01706	Ascorbate and aldarate metabolism	2.34026
	Lipid metabolism
Ga0077592_1045203	3-phenylpropionate/trans-cinnamate dioxygenase ferredoxin subunit; K05710	Fatty acid degradation	1.90624
Ga0077592_102928	Dihydroxyacetone kinase, N-terminal domain [EC:2.7.1.-]; K05878	Glycerolipid metabolism	2.97243
Ga0077592_102929	Dihydroxyacetone kinase, C-terminal domain [EC:2.7.1.-]; K05879	Glycerolipid metabolism	3.44084
Ga0077592_105685	Acyl-CoA dehydrogenase [EC:1.3.99.-]; K06445	Fatty acid degradation	1.55636
Ga0077592_1073209	3-hydroxyacyl-CoA dehydrogenase [EC:1.1.1.35]; K07516	Fatty acid degradation	2.07191
Ga0077592_112548	Acetyl-CoA C-acetyltransferase [EC:2.3.1.9]; K00626	Fatty acid degradation	1.9286
Ga0077592_1073208	Acetyl-CoA acyltransferase [EC:2.3.1.16]; K00632	Fatty acid degradation	1.87585
Ga0077592_108530	Glycerophosphoryl diester phosphodiesterase [EC:3.1.4.46]; K01126	Glycerophospholipid metabolism	1.79066
Ga0077592_104151	Enoyl-CoA hydratase [EC:4.2.1.17]; K01692	Fatty acid degradation	1.91514
Ga0077592_1045436	3-hydroxybutyrate dehydrogenase [EC:1.1.1.30]; K00019	Synthesis and degradation of ketone bodies	3.23749
Ga0077592_108524	3-oxoacyl-[acyl-carrier protein]; reductase [EC:1.1.1.100]; K00059	Fatty acid biosynthesis	4.01346
Ga0077592_1134105	3-oxoacid CoA-transferase subunit A [EC:2.8.3.5]; K01028	Synthesis and degradation of ketone bodies	2.92592
Ga0077592_1134106	3-oxoacid CoA-transferase subunit B [EC:2.8.3.5]; K01029	Synthesis and degradation of ketone bodies	3.80295
Ga0077592_1045437	Acetoacetate decarboxylase [EC:4.1.1.4]; K01574	Synthesis and degradation of ketone bodies	3.48631
	Amino acid metabolism
Ga0077592_1003321	Shikimate dehydrogenase [EC:1.1.1.25]; K00014	Phenylalanine, tyrosine and tryptophan biosynthesis	1.82176
Ga0077592_112547	3-hydroxybutyryl-CoA dehydrogenase [EC:1.1.1.157]; K00074	Phenylalanine metabolism	1.8534
Ga0077592_11364	Choline dehydrogenase [EC:1.1.99.1]; K00108	Glycine, serine and threonine metabolism	2.3639
Ga0077592_11363	Betaine-aldehyde dehydrogenase [EC:1.2.1.8]; K00130	Glycine, serine and threonine metabolism	2.42767
Ga0077592_112846	Ssuccinate-semialdehyde dehydrogenase / glutarate-semialdehyde dehydrogenase [EC:1.2.1.16 1.2.1.79 1.2.1.20]; K00135	Alanine, aspartate and glutamate metabolism	2.0256
Ga0077592_1072118	Malonate-semialdehyde dehydrogenase (acetylating) / methylmalonate-semialdehyde dehydrogenase [EC:1.2.1.18 1.2.1.27]; K00140	Valine, leucine and isoleucine degradation	3.41548
Ga0077592_104919	Isovaleryl-CoA dehydrogenase [EC:1.3.8.4]; K00253	Valine, leucine and isoleucine degradation	1.68373
Ga0077592_1073199	Glutamate dehydrogenase (NAD(P)+) [EC:1.4.1.3]; K00261	Arginine biosynthesis	1.60885
Ga0077592_10176	D-amino-acid dehydrogenase [EC:1.4.99.-]; K00285	Phenylalanine metabolism	1.72774
Ga0077592_113616	Sarcosine oxidase, subunit alpha [EC:1.5.3.1]; K00302	Glycine, serine and threonine metabolism	5.46057
Ga0077592_101374	Sarcosine oxidase, subunit beta [EC:1.5.3.1]; K00303	Glycine, serine and threonine metabolism	2.19319
Ga0077592_113617	Sarcosine oxidase, subunit delta [EC:1.5.3.1]; K00304	Glycine, serine and threonine metabolism	4.44067
Ga0077592_113615	Sarcosine oxidase, subunit gamma [EC:1.5.3.1]; K00305	Glycine, serine and threonine metabolism	5.40728
Ga0077592_115494	Tryptophan 2,3-dioxygenase [EC:1.13.11.11]; K00453	Tryptophan metabolism	1.93349
Ga0077592_1016190	Prolyl 4-hydroxylase [EC:1.14.11.2]; K00472	Arginine and proline metabolism	2.10253
Ga0077592_109748	5-methyltetrahydropteroyltriglutamate--homocysteine methyltransferase [EC:2.1.1.14]; K00549	Cysteine and methionine metabolism	1.65947
Ga0077592_1032214	Glycine hydroxymethyltransferase [EC:2.1.2.1]; K00600	Glycine, serine and threonine metabolism	2.21283
Ga0077592_10817	Aminomethyltransferase [EC:2.1.2.10]; K00605	Glycine, serine and threonine metabolism	1.86063
Ga0077592_10151	Ring-1,2-phenylacetyl-CoA epoxidase subunit PaaA [EC:1.14.13.149]; K02609	Phenylalanine metabolism	2.25613
Ga0077592_10364	Ring-1,2-phenylacetyl-CoA epoxidase subunit PaaB; K02610	Phenylalanine metabolism	1.77284
Ga0077592_10363	Ring-1,2-phenylacetyl-CoA epoxidase subunit PaaC [EC:1.14.13.149]; K02611	Phenylalanine metabolism	2.12527
Ga0077592_10362	Ring-1,2-phenylacetyl-CoA epoxidase subunit PaaD; K02612	Phenylalanine metabolism	2.04117
Ga0077592_10361	Ring-1,2-phenylacetyl-CoA epoxidase subunit PaaE; K02613	Phenylalanine metabolism	1.90441
Ga0077592_1073149	Catalase [EC:1.11.1.6]; K03781	Tryptophan metabolism	1.94612
Ga0077592_107638	3-(3-hydroxy-phenyl)propionate hydroxylase [EC:1.14.13.127]; K05712	Phenylalanine metabolism	5.59153
Ga0077592_115492	Arylformamidase [EC:3.5.1.9]; K07130	Tryptophan metabolism	2.20547
Ga0077592_106512	RHH-type transcriptional regulator, proline utilization regulon repressor / proline dehydrogenase / delta 1-pyrroline-5-carboxylate dehydrogenase [EC:1.5.5.2 1.2.1.88]; K13821	Alanine, aspartate and glutamate metabolism	1.98952
Ga0077592_106512	Glutamate dehydrogenase [EC:1.4.1.2]; K15371	Arginine biosynthesis	1.74259
Ga0077592_113476	Acetylornithine/N-succinyldiaminopimelate aminotransferase [EC:2.6.1.11 2.6.1.17]; K00821	Arginine biosynthesis	1.96147
Ga0077592_112167	Beta-alanine--pyruvate transaminase [EC:2.6.1.18]; K00822	Valine, leucine and isoleucine degradation	2.02759
Ga0077592_105860	Aromatic-amino-acid transaminase [EC:2.6.1.57]; K00832	Cysteine and methionine metabolism	3.47453
Ga0077592_101331	Dihydroxy-acid dehydratase [EC:4.2.1.9]; K01687	Valine, leucine and isoleucine biosynthesis	2.18798
Ga0077592_108231	Adenosylhomocysteinase [EC:3.3.1.1]; K01251	Cysteine and methionine metabolism	2.30137
Ga0077592_115493	Kynureninase [EC:3.7.1.3]; K01556	Tryptophan metabolism	2.25427
Ga0077592_1032147	3-isopropylmalate/(R)-2-methylmalate dehydratase large subunit [EC:4.2.1.33 4.2.1.35]; K01703	Valine, leucine and isoleucine biosynthesis	2.28354
Ga0077592_1032148	3-isopropylmalate/(R)-2-methylmalate dehydratase small subunit [EC:4.2.1.33 4.2.1.35]; K01704	Valine, leucine and isoleucine biosynthesis	2.14578
Ga0077592_101373	L-serine dehydratase [EC:4.3.1.17]; K01752	Glycine, serine and threonine metabolism	4.81304
Ga0077592_104921	3-methylcrotonyl-CoA carboxylase alpha subunit [EC:6.4.1.4]; K01968	Valine, leucine and isoleucine degradation	2.10637
Ga0077592_104920	3-methylcrotonyl-CoA carboxylase beta subunit [EC:6.4.1.4]; K01969	Valine, leucine and isoleucine degradation	1.70783
	Metabolism of other amino acids
Ga0077592_1097236	Alpha-D-ribose 1-methylphosphonate 5-triphosphate synthase subunit PhnL [EC:2.7.8.37]; K05780	Phosphonate and phosphinate metabolism	4.12994
Ga0077592_1097237	Alpha-D-ribose 1-methylphosphonate 5-triphosphate diphosphatase [EC:3.6.1.63]; K06162	Phosphonate and phosphinate metabolism	2.39509
Ga0077592_1097234	Alpha-D-ribose 1-methylphosphonate 5-phosphate C-P lyase [EC:4.7.1.1]; K06163	Phosphonate and phosphinate metabolism	3.70053
Ga0077592_1097233	Alpha-D-ribose 1-methylphosphonate 5-triphosphate synthase subunit PhnI [EC:2.7.8.37]; K06164	Phosphonate and phosphinate metabolism	3.78613
Ga0077592_1097232	Alpha-D-ribose 1-methylphosphonate 5-triphosphate synthase subunit PhnH [EC:2.7.8.37]; K06165	Phosphonate and phosphinate metabolism	3.9463
Ga0077592_1097231	alpha-D-ribose 1-methylphosphonate 5-triphosphate synthase subunit PhnG [EC:2.7.8.37]; K06166	Phosphonate and phosphinate metabolism	4.06579
Ga0077592_10136	Glutathione S-transferase [EC:2.5.1.18]; K00799	Glutathione metabolism	2.11749
Ga0077592_1084206	Aminopeptidase N [EC:3.4.11.2]; K01256	Glutathione metabolism	2.03789
	Nucleotide metabolism
Ga0077592_114253	Ribonucleoside-diphosphate reductase alpha chain [EC:1.17.4.1]; K00525	Purine metabolism	1.88672
Ga0077592_111948	Sulfate adenylyltransferase subunit 1 [EC:2.7.7.4]; K00956	Purine metabolism	2.16343
Ga0077592_111949	Sulfate adenylyltransferase subunit 2 [EC:2.7.7.4]; K00957	Purine metabolism	1.90221
Ga0077592_101036	Polyribonucleotide nucleotidyltransferase [EC:2.7.7.8]; K00962	Purine metabolism	1.74889
Ga0077592_110971	DNA-directed RNA polymerase subunit alpha [EC:2.7.7.6]; K03040	Purine metabolism	1.75344
Ga0077592_1109106	DNA-directed RNA polymerase subunit beta [EC:2.7.7.6]; K03043	Purine metabolism	2.46228
Ga0077592_1109105	DNA-directed RNA polymerase subunit beta' [EC:2.7.7.6]; K03046	Purine metabolism	3.02005
Ga0077592_104966	N-carbamoyl-L-amino-acid hydrolase [EC:3.5.1.87]; K06016	Pyrimidine metabolism	1.7854
Ga0077592_115451	Xanthine dehydrogenase small subunit [EC:1.17.1.4]; K13481	Purine metabolism	3.01112
Ga0077592_115450	Xanthine dehydrogenase large subunit [EC:1.17.1.4]; K13482	Purine metabolism	3.13045
Ga0077592_1140105	2-oxo-4-hydroxy-4-carboxy-5-ureidoimidazoline decarboxylase [EC:4.1.1.97]; K13485	Purine metabolism	1.88301
Ga0077592_104968	Dihydropyrimidine dehydrogenase (NAD+) subunit PreA [EC:1.3.1.1]; K17723	Pyrimidine metabolism	2.15558
Ga0077592_103732	AMP nucleosidase [EC:3.2.2.4]; K01241	Purine metabolism	2.55463
Ga0077592_1154140	DNA polymerase III subunit delta [EC:2.7.7.7]; K02340	Purine metabolism	1.93227
Ga0077592_1140106	Allantoicase [EC:3.5.3.4]; K01477	Purine metabolism	1.99877
Ga0077592_111849	Carbamoyl-phosphate synthase large subunit [EC:6.3.5.5]; K01955	Pyrimidine metabolism	1.87247
	Metabolism of cofactors and vitamins
Ga0077592_109645	Phosphomethylpyrimidine synthase [EC:4.1.99.17]; K03147	Thiamine metabolism	1.68839
Ga0077592_110935	Thiazole synthase [EC:2.8.1.10]; K03149	Thiamine metabolism	1.73387
Ga0077592_107637	NAD(P)H dehydrogenase (quinone) [EC:1.6.5.2]; K03809	Ubiquinone and other terpenoid-quinone biosynthesis	5.85338
Ga0077592_1097126	Sulfoacetaldehyde acetyltransferase [EC:2.3.3.15]; K03852	Taurine and hypotaurine metabolism	3.2498
Ga0077592_1097123	Cobaltochelatase CobS [EC:6.6.1.2]; K09882	orphyrin and chlorophyll metabolism	2.27247
Ga0077592_104528	NAD(P)H dehydrogenase (quinone) [EC:1.6.5.2]; K00355	Ubiquinone and other terpenoid-quinone biosynthesis	3.2101
Ga0077592_1097127	Phosphate acetyltransferase [EC:2.3.1.8]; K00625	Taurine and hypotaurine metabolism	2.79676
Ga0077592_10536	6,7-dimethyl-8-ribityllumazine synthase [EC:2.5.1.78]; K00794	Riboflavin metabolism	3.56821
Ga0077592_10933	GTP cyclohydrolase II [EC:3.5.4.25]; K01497	Riboflavin metabolism	1.83918
Ga0077592_108233	Methylenetetrahydrofolate reductase (NADPH) [EC:1.5.1.20]; K00297	One carbon pool by folate	2.10263
Ga0077592_111925	Alpha-ribazole phosphatase [EC:3.1.3.73]; K02226	Porphyrin and chlorophyll metabolism	1.72723
Ga0077592_111926	Adenosylcobinamide-GDP ribazoletransferase [EC:2.7.8.26]; K02233	Porphyrin and chlorophyll metabolism	1.65619
Ga0077592_111947	Uroporphyrin-III C-methyltransferase [EC:2.1.1.107]; K02303	Porphyrin and chlorophyll metabolism	2.01518
Ga0077592_113244	NAD+ synthase (glutamine-hydrolysing) [EC:6.3.5.1]; K01950	Nicotinate and nicotinamide metabolism	1.65512
Ga0077592_113614	Dihydroneopterin aldolase [EC:4.1.2.25]; K01633	Folate biosynthesis	4.87336
	Biosynthesis of other secondary metabolites
Ga0077592_1056145	dTDP-4-dehydrorhamnose reductase [EC:1.1.1.133]; K00067	Streptomycin biosynthesis	2.02973
	Xenobiotics biodegradation and metabolism
Ga0077592_11361	Glutathione-independent formaldehyde dehydrogenase [EC:1.2.1.46]; K00148	Chloroalkane and chloroalkene degradation	3.09703
Ga0077592_10722	Salicylate hydroxylase [EC:1.14.13.1]; K00480	Dioxin degradation	2.0577
Ga0077592_107631	Catechol 1,2-dioxygenase [EC:1.13.11.1]; K03381	Chlorocyclohexane and chlorobenzene degradation	6.40621
Ga0077592_10724	Vanillate O-demethylase ferredoxin subunit [EC:1.14.13.82]; K03863	Aminobenzoate degradation	2.77097
Ga0077592_1115150	Cyclohexyl-isocyanide hydratase [EC:4.2.1.103]; K18199	Caprolactam degradation	2.09113
Ga0077592_106420	2-haloacid dehalogenase [EC:3.8.1.2]; K01560	Chlorocyclohexane and chlorobenzene degradation	3.93496
Ga0077592_114017	3-oxoadipate CoA-transferase, alpha subunit [EC:2.8.3.6]; K01031	Benzoate degradation	2.60414
Ga0077592_114018	3-oxoadipate CoA-transferase, beta subunit [EC:2.8.3.6]; K01032	Benzoate degradation	2.71841
	Membrane transport
Ga0077592_102931	Multiple sugar transport system ATP-binding protein; K10112	ABC transporters	2.87481
Ga0077592_10739	Sorbitol/mannitol transport system substrate-binding protein; K10227	ABC transporters	1.52677
Ga0077592_1097272	Ribose transport system substrate-binding protein; K10439	ABC transporters	2.38232
Ga0077592_104231	Putrescine transport system substrate-binding protein; K11073	ABC transporters	1.62101
Ga0077592_10491	2-aminoethylphosphonate transport system substrate-binding protein; K11081	ABC transporters	1.61404
Ga0077592_10492	2-aminoethylphosphonate transport system ATP-binding protein; K11084	ABC transporters	1.9717
Ga0077592_1045280	Branched-chain amino acid transport system ATP-binding protein; K01995	ABC transporters	1.5067
Ga0077592_1045119	Branched-chain amino acid transport system permease protein; K01997	ABC transporters	2.18203
Ga0077592_1045120	Branched-chain amino acid transport system permease protein; K01998	ABC transporters	1.60657
Ga0077592_105897	Branched-chain amino acid transport system substrate-binding protein; K01999	ABC transporters	2.04295
Ga0077592_101367	Glycine betaine/proline transport system permease protein; K02001	ABC transporters	2.65012
Ga0077592_111711	Glycine betaine/proline transport system substrate-binding protein; K02002	ABC transporters	4.30174
Ga0077592_111929	Iron complex transport system permease protein; K02015	ABC transporters	1.86876
Ga0077592_1016163	Molybdate transport system permease protein; K02018	ABC transporters	1.84048
Ga0077592_1016162	Molybdate transport system substrate-binding protein; K02020	ABC transporters	1.53605
Ga0077592_11324	D-methionine transport system ATP-binding protein; K02071	ABC transporters	1.50378
Ga0077592_11323	D-methionine transport system permease protein; K02072	ABC transporters	1.64157
	Cellular Processes
Ga0077592_1109112	Preprotein translocase subunit SecE; K03073	Quorum sensing	2.40888
Ga0077592_110978	Preprotein translocase subunit SecY; K03076	Quorum sensing	2.91491
Ga0077592_1073495	YidC/Oxa1 family membrane protein insertase; K03217	Quorum sensing	1.81854
Ga0077592_106415	Peptide/nickel transport system ATP-binding protein; K02032	Quorum sensing	2.39871
Ga0077592_106416	Peptide/nickel transport system permease protein; K02034	Quorum sensing	1.63627
Ga0077592_106418	Peptide/nickel transport system substrate-binding protein; K02035	Quorum sensing	3.24705
Ga0077592_10649	Putative spermidine/putrescine transport system ATP-binding protein; K02052	Quorum sensing	2.44238
Ga0077592_1003233	Putative spermidine/putrescine transport system substrate-binding protein; K02055	Quorum sensing	1.94571
	Translation
Ga0077592_1109109	Large subunit ribosomal protein L1; K02863	Ribosome	2.8775
Ga0077592_1109108	Large subunit ribosomal protein L10; K02864	Ribosome	3.23259
Ga0077592_1109110	Large subunit ribosomal protein L11; K02867	Ribosome	2.80089
Ga0077592_110988	Large subunit ribosomal protein L14; K02874	Ribosome	2.46549
Ga0077592_110979	Large subunit ribosomal protein L15; K02876	Ribosome	3.0749
Ga0077592_110991	Large subunit ribosomal protein L16; K02878	Ribosome	3.08316
Ga0077592_110970	Large subunit ribosomal protein L17; K02879	Ribosome	1.64045
Ga0077592_110982	Large subunit ribosomal protein L18; K02881	Ribosome	2.78803
Ga0077592_1118149	Large subunit ribosomal protein L19; K02884	Ribosome	2.88069
Ga0077592_110995	Large subunit ribosomal protein L2; K02886	Ribosome	2.81573
Ga0077592_11405	Large subunit ribosomal protein L20; K02887	Ribosome	1.56438
Ga0077592_110993	Large subunit ribosomal protein L22; K02890	Ribosome	3.004
Ga0077592_110996	Large subunit ribosomal protein L23; K02892	Ribosome	2.40429
Ga0077592_110987	Large subunit ribosomal protein L24; K02895	Ribosome	2.22298
Ga0077592_1073270	Large subunit ribosomal protein L25; K02897	Ribosome	1.82088
Ga0077592_114241	Large subunit ribosomal protein L27; K02899	Ribosome	1.5388
Ga0077592_110990	Large subunit ribosomal protein L29; K02904	Ribosome	3.02473
Ga0077592_110998	Large subunit ribosomal protein L3; K02906	Ribosome	1.90545
Ga0077592_110980	Large subunit ribosomal protein L30; K02907	Ribosome	2.94553
Ga0077592_110997	Large subunit ribosomal protein L4; K02926	Ribosome	2.39796
Ga0077592_110986	Large subunit ribosomal protein L5; K02931	Ribosome	2.4243
Ga0077592_110983	Large subunit ribosomal protein L6; K02933	Ribosome	2.66949
Ga0077592_1109107	Large subunit ribosomal protein L7/L12; K02935	Ribosome	3.12075
Ga0077592_10428	Large subunit ribosomal protein L9; K02939	Ribosome	1.90749
Ga0077592_110999	Small subunit ribosomal protein S10; K02946	Ribosome	1.56436
Ga0077592_110985	Small subunit ribosomal protein S14; K02954	Ribosome	2.3267
Ga0077592_110989	Small subunit ribosomal protein S17; K02961	Ribosome	3.50036
Ga0077592_10427	Small subunit ribosomal protein S18; K02963	Ribosome	1.66658
Ga0077592_110994	Small subunit ribosomal protein S19; K02965	Ribosome	2.86851
Ga0077592_1073391	Small subunit ribosomal protein S21; K02970	Ribosome	1.98172
Ga0077592_110992	Small subunit ribosomal protein S3; K02982	Ribosome	2.90753
Ga0077592_110972	Small subunit ribosomal protein S4; K02986	Ribosome	1.86934
Ga0077592_110981	Small subunit ribosomal protein S5; K02988	Ribosome	2.80839
Ga0077592_10425	Small subunit ribosomal protein S6; K02990	Ribosome	1.64127
Ga0077592_1109102	Small subunit ribosomal protein S7; K02992	Ribosome	2.07506
Ga0077592_110984	Small subunit ribosomal protein S8; K02994	Ribosome	2.60331
Ga0077592_1073187	Small subunit ribosomal protein S9; K02996	Ribosome	1.60534
Ga0077592_11407	Phenylalanyl-tRNA synthetase beta chain [EC:6.1.1.20]; K01890	Aminoacyl-tRNA biosynthesis	1.60749
	Replication and repair
Ga0077592_10426	Primosomal replication protein N; K02686	Homologous recombination	2.33246
Ga0077592_107128	Single-strand DNA-binding protein; K03111	DNA replication	1.6166
	Folding, sorting and degradation
Ga0077592_111988	Signal peptidase II [EC:3.4.23.36]; K03101	Protein export	1.55556
Ga0077592_115439	Chaperonin GroEL; K04077	RNA degradation	2.46044
Ga0077592_1118103	Ribonuclease E [EC:3.1.26.12]; K08300	RNA degradation	1.9935
	Drug resistance: Antimicrobial
Ga0077592_107329	Membrane fusion protein, multidrug efflux system; K03585	beta-Lactam resistance	2.13665
Ga0077592_107334	Serine protease Do [EC:3.4.21.107]; K04771	Cationic antimicrobial peptide (CAMP) resistance	1.86944
Ga0077592_11066	Outer membrane protein OmpU; K08720	beta-Lactam resistance	1.66261
Ga0077592_107328	Multidrug efflux pump; K18138	beta-Lactam resistance	2.44566
Ga0077592_107327	Outer membrane protein, multidrug efflux system; K18139	beta-Lactam resistance	3.02866
	Signal transduction
Ga0077592_107613	Methyl-accepting chemotaxis protein; K03406	Two-component system	3.50681
Ga0077592_107255	Two-component system, NarL family, nitrate/nitrite sensor histidine kinase NarX [EC:2.7.13.3]; K07673	Two-component system	2.21563
Ga0077592_107257	Two-component system, NarL family, nitrate/nitrite response regulator NarL; K07684	Two-component system	1.9404
Ga0077592_1154149	Aerobic C4-dicarboxylate transport protein; K11103	Two-component system	1.77773
Ga0077592_1045264	Two-component system, chemotaxis family, CheB/CheR fusion protein [EC:2.1.1.80 3.1.1.61]; K13924	Two-component system	2.10171
Ga0077592_1012150	Flagellar transcriptional activator FlhC; K02402	Two-component system	2.05674
Ga0077592_1043183	Flagellar transcriptional activator FlhD; K02403	Two-component system	2.32595
