# Supplementary material for: Transcriptional analysis reveals the metabolic state of Burkholderia zhejiangensis CEIB S4-3 during methyl parathion degradation
Source: PeerJ. 2019 Apr 24;7:e6822. doi: 10.7717/peerj.6822 (PMC6486813; doi:10.7717/peerj.6822)
Supplement: Supplemental Information 11 — Relative expression of mpd gene determined by qRT-PCR. Data were used to construct the Fig. 5 [file peerj-07-6822-s011.xlsx]

## Sheet: Hoja1
qRT-PCR_mpd gene
Gene	Experimental condition	Time (h)	Ct	XCt
recA	WMP	0	16.9	16.95
recA	WMP	0	16.85
recA	WMP	0	17.1
Gene	Experimental condition	Time (h)	Ct	XCt
recA	MP	0	15.67	15.9133
recA	MP	0	15.75
recA	MP	0	16.32
Gene	Experimental condition	Time (h)	Ct	XCt
recA	WMP	3	29.28	28.4133
recA	WMP	3	28.1
recA	WMP	3	27.86
Gene	Experimental condition	Time (h)	Ct	XCt
recA	MP	3	31.38	31.3667
recA	MP	3	31.36
recA	MP	3	31.36
Gene	Experimental condition	Time (h)	Ct	XCt
recA	WMP	9	14.92	14.8767
recA	WMP	9	14.84
recA	WMP	9	14.87
Gene	Experimental condition	Time (h)	Ct	XCt
recA	MP	9	17.21	17.1567
recA	MP	9	17.04
recA	MP	9	17.22
Gene	Experimental condition	Time (h)	Ct	X Ct	ΔCt	X Ct WMP	ΔΔCt	2-ΔΔCt	X 2-ΔΔCt	DS
mpd	WMP	0	14.56	14.59	-2.34	-2.36	0.02	0.986233	1.00084	0.0504871
mpd	WMP	0	14.55		-2.3	-2.36	0.06	0.959264
mpd	WMP	0	14.66		-2.44	-2.36	-0.08	1.05702
Gene	Experimental condition	Time (h)	Ct	X Ct	ΔCt	X Ct WMP	ΔΔCt	2-ΔΔCt	X 2-ΔΔCt	DS
mpd	MP	0	13.22	13.2633	-2.45	-2.36	-0.09	1.06437	1.22841	0.14235
mpd	MP	0	13.01		-2.74	-2.36	-0.38	1.30134
mpd	MP	0	13.56		-2.76	-2.36	-0.4	1.31951
Gene	Experimental condition	Time (h)	Ct	X Ct	ΔCt	X Ct WMP	ΔΔCt	2-ΔΔCt	X 2-ΔΔCt	DS
mpd	WMP	3	15.51	15.5333	-13.77	-12.88	-0.89	1.85318	1.10795	0.646237
mpd	WMP	3	15.6		-12.5	-12.88	0.38	0.768438
mpd	WMP	3	15.49		-12.37	-12.88	0.51	0.702222
Gene	Experimental condition	Time (h)	Ct	X Ct	ΔCt	X Ct WMP	ΔΔCt	2-ΔΔCt	X 2-ΔΔCt	DS
mpd	MP	3	16.96	16.9733	-14.42	-12.88	-1.54	2.90795	2.85534	0.0743987
mpd	MP	3	17.01		-14.35	-12.88	-1.47	2.77022
mpd	MP	3	16.95		-14.41	-12.88	-1.53	2.88786
Gene	Experimental condition	Time (h)	Ct	X Ct	ΔCt	X Ct WMP	ΔΔCt	2-ΔΔCt	X 2-ΔΔCt	DS
mpd	WMP	9	12.44	12.6433	-2.48	-2.23333	-0.246667	1.18646	1.01285	0.193159
mpd	WMP	9	12.54		-2.3	-2.23333	-0.0666667	1.04729
mpd	WMP	9	12.95		-1.92	-2.23333	0.313333	0.80478
Gene	Experimental condition	Time (h)	Ct	X Ct	ΔCt	X Ct WMP	ΔΔCt	2-ΔΔCt	X 2-ΔΔCt	DS
mpd	MP	9	15.45	15.47	-1.76	-2.23333	0.473333	0.720298	0.685217	0.0355744
mpd	MP	9	15.43		-1.61	-2.23333	0.623333	0.649169
mpd	MP	9	15.53		-1.69	-2.23333	0.543333	0.686184
