# Supplementary material for: Transcriptional analysis reveals the metabolic state of Burkholderia zhejiangensis CEIB S4-3 during methyl parathion degradation
Source: PeerJ. 2019 Apr 24;7:e6822. doi: 10.7717/peerj.6822 (PMC6486813; doi:10.7717/peerj.6822)
Supplement: Supplemental Information 12 — Relative expression of PNP biodegradation clusters genes determined by qRT-PCR, data were used for generation of Table 2. [file peerj-07-6822-s012.xlsx]

## Sheet: pnpA
qRT-PCR_Relative expression_Biodegradation clusters genes
Gene	Experimental condition	Time (h)	Ct	XCt
recA	WMP	0	16.9	16.95
recA	WMP	0	16.85
recA	WMP	0	17.1
Gene	Experimental condition	Time (h)	Ct	XCt
recA	MP	0	15.67	15.9133
recA	MP	0	15.75
recA	MP	0	16.32
Gene	Experimental condition	Time (h)	Ct	XCt
recA	WMP	3	29.28	28.4133
recA	WMP	3	28.1
recA	WMP	3	27.86
Gene	Experimental condition	Time (h)	Ct	XCt
recA	MP	3	31.38	31.3667
recA	MP	3	31.36
recA	MP	3	31.36
Gene	Experimental condition	Time (h)	Ct	XCt
recA	WMP	9	14.92	14.8767
recA	WMP	9	14.84
recA	WMP	9	14.87
Gene	Experimental condition	Time (h)	Ct	XCt
recA	MP	9	17.21	17.1567
recA	MP	9	17.04
recA	MP	9	17.22
Gene	Experimental condition	Time (h)	Ct	X Ct	ΔCt	X Ct WMP	ΔΔCt	2-ΔΔCt	X 2-ΔΔCt	DS
pnpA	WMP	0	21.25	21.4567	4.35	4.50667	-0.156667	1.11471	1.00364	0.105231
pnpA	WMP	0	21.37		4.52	4.50667	0.0133333	0.990801
pnpA	WMP	0	21.75		4.65	4.50667	0.143333	0.905425
Gene	Experimental condition	Time (h)	Ct	X Ct	ΔCt	X Ct WMP	ΔΔCt	2-ΔΔCt	X 2-ΔΔCt	DS
pnpA	MP	0	19.08	19.4433	3.41	4.50667	-1.09667	2.1386	2.01763	0.527065
pnpA	MP	0	19.73		3.98	4.50667	-0.526667	1.4406
pnpA	MP	0	19.52		3.2	4.50667	-1.30667	2.47369
Gene	Experimental condition	Time (h)	Ct	X Ct	ΔCt	X Ct WMP	ΔΔCt	2-ΔΔCt	X 2-ΔΔCt	DS
pnpA	WMP	3	22.22	22.2533	-7.06	-6.16	-0.9	1.86607	1.11024	0.654881
pnpA	WMP	3	22.35		-5.75	-6.16	0.41	0.752623
pnpA	WMP	3	22.19		-5.67	-6.16	0.49	0.712025
Gene	Experimental condition	Time (h)	Ct	X Ct	ΔCt	X Ct WMP	ΔΔCt	2-ΔΔCt	X 2-ΔΔCt	DS
pnpA	MP	3	18.77	18.8633	-12.61	-6.16	-6.45	87.4266	81.8618	12.4047
pnpA	MP	3	19.12		-12.24	-6.16	-6.08	67.6492
pnpA	MP	3	18.7		-12.66	-6.16	-6.5	90.5097
Gene	Experimental condition	Time (h)	Ct	X Ct	ΔCt	X Ct WMP	ΔΔCt	2-ΔΔCt	X 2-ΔΔCt	DS
pnpA	WMP	9	20.99	20.99	6.07	6.11333	-0.0433333	1.03049	1.00023	0.0264286
pnpA	WMP	9	20.97		6.13	6.11333	0.0166667	0.988514
pnpA	WMP	9	21.01		6.14	6.11333	0.0266667	0.981686
Gene	Experimental condition	Time (h)	Ct	X Ct	ΔCt	X Ct WMP	ΔΔCt	2-ΔΔCt	X 2-ΔΔCt	DS
pnpA	MP	9	17.15	17.2767	-0.06	6.11333	-6.17333	72.1703	63.9583	7.11183
pnpA	MP	9	17.25		0.21	6.11333	-5.90333	59.8522
pnpA	MP	9	17.43		0.21	6.11333	-5.90333	59.8522

## Sheet: pnpA´
Gene	Experimental condition	Time (h)	Ct	XCt
recA	WMP	0	16.9	16.95
recA	WMP	0	16.85
recA	WMP	0	17.1
Gene	Experimental condition	Time (h)	Ct	XCt
recA	MP	0	15.67	15.9133
recA	MP	0	15.75
recA	MP	0	16.32
Gene	Experimental condition	Time (h)	Ct	XCt
recA	WMP	3	29.28	28.4133
recA	WMP	3	28.1
recA	WMP	3	27.86
Gene	Experimental condition	Time (h)	Ct	XCt
recA	MP	3	31.38	31.3667
recA	MP	3	31.36
recA	MP	3	31.36
Gene	Experimental condition	Time (h)	Ct	XCt
recA	WMP	9	14.92	14.8767
recA	WMP	9	14.84
recA	WMP	9	14.87
Gene	Experimental condition	Time (h)	Ct	XCt
recA	MP	9	17.21	17.1567
recA	MP	9	17.04
recA	MP	9	17.22
Gene	Experimental condition	Time (h)	Ct	X Ct	ΔCt	X Ct WMP	ΔΔCt	2-ΔΔCt	X 2-ΔΔCt	DS
pnpA´	WMP	0	31.94	31.9533	15.04	15.0033	0.0366667	0.974905	1.00195	0.0774049
pnpA´	WMP	0	31.73		14.88	15.0033	-0.123333	1.08925
pnpA´	WMP	0	32.19		15.09	15.0033	0.0866667	0.941696
Gene	Experimental condition	Time (h)	Ct	X Ct	ΔCt	X Ct WMP	ΔΔCt	2-ΔΔCt	X 2-ΔΔCt	DS
pnpA´	MP	0	30.24	30.7633	14.57	15.0033	-0.433333	1.35035	1.57468	1.36549
pnpA´	MP	0	32.33		16.58	15.0033	1.57667	0.335256
pnpA´	MP	0	29.72		13.4	15.0033	-1.60333	3.03845
Gene	Experimental condition	Time (h)	Ct	X Ct	ΔCt	X Ct WMP	ΔΔCt	2-ΔΔCt	X 2-ΔΔCt	DS
pnpA´	WMP	3	32.8	32.8033	3.52	4.39	-0.87	1.82766	1.10392	0.629555
pnpA´	WMP	3	32.81		4.71	4.39	0.32	0.80107
pnpA´	WMP	3	32.8		4.94	4.39	0.55	0.68302
Gene	Experimental condition	Time (h)	Ct	X Ct	ΔCt	X Ct WMP	ΔΔCt	2-ΔΔCt	X 2-ΔΔCt	DS
pnpA´	MP	3	26.32	26.5167	-5.06	4.39	-9.45	699.413	625.925	187.323
pnpA´	MP	3	27.06		-4.3	4.39	-8.69	413.001
pnpA´	MP	3	26.17		-5.19	4.39	-9.58	765.363
Gene	Experimental condition	Time (h)	Ct	X Ct	ΔCt	X Ct WMP	ΔΔCt	2-ΔΔCt	X 2-ΔΔCt	DS
pnpA´	WMP	9	28.64	28.42	13.72	13.5433	0.176667	0.884745	1.00726	0.150709
pnpA´	WMP	9	28.44		13.6	13.5433	0.0566667	0.961483
pnpA´	WMP	9	28.18		13.31	13.5433	-0.233333	1.17555
Gene	Experimental condition	Time (h)	Ct	X Ct	ΔCt	X Ct WMP	ΔΔCt	2-ΔΔCt	X 2-ΔΔCt	DS
pnpA´	MP	9	22.82	23.06	5.61	13.5433	-7.93333	244.439	201.606	37.116
pnpA´	MP	9	23.08		6.04	13.5433	-7.50333	181.438
pnpA´	MP	9	23.28		6.06	13.5433	-7.48333	178.94

## Sheet: pnpB
Gene	Experimental condition	Time (h)	Ct	XCt
recA	WMP	0	16.9	16.95
recA	WMP	0	16.85
recA	WMP	0	17.1
Gene	Experimental condition	Time (h)	Ct	XCt
recA	MP	0	15.67	15.9133
recA	MP	0	15.75
recA	MP	0	16.32
Gene	Experimental condition	Time (h)	Ct	XCt
recA	WMP	3	29.28	28.4133
recA	WMP	3	28.1
recA	WMP	3	27.86
Gene	Experimental condition	Time (h)	Ct	XCt
recA	MP	3	31.38	31.3667
recA	MP	3	31.36
recA	MP	3	31.36
Gene	Experimental condition	Time (h)	Ct	XCt
recA	WMP	9	14.92	14.8767
recA	WMP	9	14.84
recA	WMP	9	14.87
Gene	Experimental condition	Time (h)	Ct	XCt
recA	MP	9	17.21	17.1567
recA	MP	9	17.04
recA	MP	9	17.22
Gene	Experimental condition	Time (h)	Ct	X Ct	ΔCt	X Ct WMP	ΔΔCt	2-ΔΔCt	X 2-ΔΔCt	DS
pnpB	WMP	0	22.4	22.5	5.5	5.55	-0.05	1.03526	1.00276	0.0897876
pnpB	WMP	0	22.55		5.7	5.55	0.15	0.90125
pnpB	WMP	0	22.55		5.45	5.55	-0.1	1.07177
Gene	Experimental condition	Time (h)	Ct	X Ct	ΔCt	X Ct WMP	ΔΔCt	2-ΔΔCt	X 2-ΔΔCt	DS
pnpB	MP	0	20.69	21.0467	5.02	5.55	-0.53	1.44393	1.34981	0.237915
pnpB	MP	0	20.69		4.94	5.55	-0.61	1.52626
pnpB	MP	0	21.76		5.44	5.55	-0.11	1.07923
Gene	Experimental condition	Time (h)	Ct	X Ct	ΔCt	X Ct WMP	ΔΔCt	2-ΔΔCt	X 2-ΔΔCt	DS
pnpB	WMP	3	23.54	23.8	-5.74	-4.61333	-1.12667	2.18354	1.20316	0.878184
pnpB	WMP	3	24.52		-3.58	-4.61333	1.03333	0.48858
pnpB	WMP	3	23.34		-4.52	-4.61333	0.0933333	0.937354
Gene	Experimental condition	Time (h)	Ct	X Ct	ΔCt	X Ct WMP	ΔΔCt	2-ΔΔCt	X 2-ΔΔCt	DS
pnpB	MP	3	18.94	18.8667	-12.44	-4.61333	-7.82667	227.019	236.765	8.60488
pnpB	MP	3	18.84		-12.52	-4.61333	-7.90667	239.963
pnpB	MP	3	18.82		-12.54	-4.61333	-7.92667	243.313
Gene	Experimental condition	Time (h)	Ct	X Ct	ΔCt	X Ct WMP	ΔΔCt	2-ΔΔCt	X 2-ΔΔCt	DS
pnpB	WMP	9	21.47	21.4467	6.55	6.57	-0.02	1.01396	1.00019	0.0238472
pnpB	WMP	9	21.45		6.61	6.57	0.04	0.972655
pnpB	WMP	9	21.42		6.55	6.57	-0.02	1.01396
Gene	Experimental condition	Time (h)	Ct	X Ct	ΔCt	X Ct WMP	ΔΔCt	2-ΔΔCt	X 2-ΔΔCt	DS
pnpB	MP	9	16.89	16.92	-0.32	6.57	-6.89	118.603	112.139	7.9585
pnpB	MP	9	16.92		-0.12	6.57	-6.69	103.25
pnpB	MP	9	16.95		-0.27	6.57	-6.84	114.563

## Sheet: pnpE2
Gene	Experimental condition	Time (h)	Ct	XCt
recA	WMP	0	16.9	16.95
recA	WMP	0	16.85
recA	WMP	0	17.1
Gene	Experimental condition	Time (h)	Ct	XCt
recA	MP	0	15.67	15.9133
recA	MP	0	15.75
recA	MP	0	16.32
Gene	Experimental condition	Time (h)	Ct	XCt
recA	WMP	3	29.28	28.4133
recA	WMP	3	28.1
recA	WMP	3	27.86
Gene	Experimental condition	Time (h)	Ct	XCt
recA	MP	3	31.38	31.3667
recA	MP	3	31.36
recA	MP	3	31.36
Gene	Experimental condition	Time (h)	Ct	XCt
recA	WMP	9	14.92	14.8767
recA	WMP	9	14.84
recA	WMP	9	14.87
Gene	Experimental condition	Time (h)	Ct	XCt
recA	MP	9	17.21	17.1567
recA	MP	9	17.04
recA	MP	9	17.22
Gene	Experimental condition	Time (h)	Ct	X Ct	ΔCt	X Ct WMP	ΔΔCt	2-ΔΔCt	X 2-ΔΔCt	DS
pnpE2	WMP	0	21.47	21.57	4.57	4.62	-0.05	1.03526	1.00034	0.0319276
pnpE2	WMP	0	21.51		4.66	4.62	0.04	0.972655
pnpE2	WMP	0	21.73		4.63	4.62	0.01	0.993092
Gene	Experimental condition	Time (h)	Ct	X Ct	ΔCt	X Ct WMP	ΔΔCt	2-ΔΔCt	X 2-ΔΔCt	DS
pnpE2	MP	0	18.3	18.6533	2.63	4.62	-1.99	3.97237	3.71495	0.597926
pnpE2	MP	0	18.32		2.57	4.62	-2.05	4.14106
pnpE2	MP	0	19.34		3.02	4.62	-1.6	3.03143
Gene	Experimental condition	Time (h)	Ct	X Ct	ΔCt	X Ct WMP	ΔΔCt	2-ΔΔCt	X 2-ΔΔCt	DS
pnpE2	WMP	3	22.49	22.52	-6.79	-5.89333	-0.896667	1.86176	1.10953	0.652045
pnpE2	WMP	3	22.6		-5.5	-5.89333	0.393333	0.761368
pnpE2	WMP	3	22.47		-5.39	-5.89333	0.503333	0.705475
Gene	Experimental condition	Time (h)	Ct	X Ct	ΔCt	X Ct WMP	ΔΔCt	2-ΔΔCt	X 2-ΔΔCt	DS
pnpE2	MP	3	17.54	17.5467	-13.84	-5.89333	-7.94667	246.709	243.34	4.44248
pnpE2	MP	3	17.57		-13.79	-5.89333	-7.89667	238.305
pnpE2	MP	3	17.53		-13.83	-5.89333	-7.93667	245.005
Gene	Experimental condition	Time (h)	Ct	X Ct	ΔCt	X Ct WMP	ΔΔCt	2-ΔΔCt	X 2-ΔΔCt	DS
pnpE2	WMP	9	19.68	19.7367	4.76	4.86	-0.1	1.07177	1.00123	0.0614575
pnpE2	WMP	9	19.76		4.92	4.86	0.06	0.959264
pnpE2	WMP	9	19.77		4.9	4.86	0.04	0.972655
Gene	Experimental condition	Time (h)	Ct	X Ct	ΔCt	X Ct WMP	ΔΔCt	2-ΔΔCt	X 2-ΔΔCt	DS
pnpE2	MP	9	15.45	15.39	-1.76	4.86	-6.62	98.36	98.9177	5.51617
pnpE2	MP	9	15.35		-1.69	4.86	-6.55	93.7015
pnpE2	MP	9	15.37		-1.85	4.86	-6.71	104.691

## Sheet: pnpE1
Gene	Experimental condition	Time (h)	Ct	XCt
recA	WMP	0	16.9	16.95
recA	WMP	0	16.85
recA	WMP	0	17.1
Gene	Experimental condition	Time (h)	Ct	XCt
recA	MP	0	15.67	15.9133
recA	MP	0	15.75
recA	MP	0	16.32
Gene	Experimental condition	Time (h)	Ct	XCt
recA	WMP	3	29.28	28.4133
recA	WMP	3	28.1
recA	WMP	3	27.86
Gene	Experimental condition	Time (h)	Ct	XCt
recA	MP	3	31.38	31.3667
recA	MP	3	31.36
recA	MP	3	31.36
Gene	Experimental condition	Time (h)	Ct	XCt
recA	WMP	9	14.92	14.8767
recA	WMP	9	14.84
recA	WMP	9	14.87
Gene	Experimental condition	Time (h)	Ct	XCt
recA	MP	9	17.21	17.1567
recA	MP	9	17.04
recA	MP	9	17.22
Gene	Experimental condition	Time (h)	Ct	X Ct	ΔCt	X Ct WMP	ΔΔCt	2-ΔΔCt	X 2-ΔΔCt	DS
pnpE1	WMP	0	21.39	21.64	4.49	4.69	-0.2	1.1487	1.01505	0.204886
pnpE1	WMP	0	21.38		4.53	4.69	-0.16	1.11729
pnpE1	WMP	0	22.15		5.05	4.69	0.36	0.779165
Gene	Experimental condition	Time (h)	Ct	X Ct	ΔCt	X Ct WMP	ΔΔCt	2-ΔΔCt	X 2-ΔΔCt	DS
pnpE1	MP	0	19.48	19.2833	3.81	4.69	-0.88	1.84038	2.55251	0.619682
pnpE1	MP	0	18.87		3.12	4.69	-1.57	2.96905
pnpE1	MP	0	19.5		3.18	4.69	-1.51	2.8481
Gene	Experimental condition	Time (h)	Ct	X Ct	ΔCt	X Ct WMP	ΔΔCt	2-ΔΔCt	X 2-ΔΔCt	DS
pnpE1	WMP	3	22.34	22.3933	-6.94	-6.02	-0.92	1.89212	1.11536	0.672688
pnpE1	WMP	3	22.54		-5.56	-6.02	0.46	0.726986
pnpE1	WMP	3	22.3		-5.56	-6.02	0.46	0.726986
Gene	Experimental condition	Time (h)	Ct	X Ct	ΔCt	X Ct WMP	ΔΔCt	2-ΔΔCt	X 2-ΔΔCt	DS
pnpE1	MP	3	17.89	18.0667	-13.49	-6.02	-7.47	177.294	159.954	44.0277
pnpE1	MP	3	18.56		-12.8	-6.02	-6.78	109.896
pnpE1	MP	3	17.75		-13.61	-6.02	-7.59	192.672
Gene	Experimental condition	Time (h)	Ct	X Ct	ΔCt	X Ct WMP	ΔΔCt	2-ΔΔCt	X 2-ΔΔCt	DS
pnpE1	WMP	9	20.07	20.5633	5.15	5.68667	-0.536667	1.45062	1.04322	0.374039
pnpE1	WMP	9	21.01		6.17	5.68667	0.483333	0.715323
pnpE1	WMP	9	20.61		5.74	5.68667	0.0533333	0.963707
Gene	Experimental condition	Time (h)	Ct	X Ct	ΔCt	X Ct WMP	ΔΔCt	2-ΔΔCt	X 2-ΔΔCt	DS
pnpE1	MP	9	16.25	16.2367	-0.96	5.68667	-6.64667	100.195	97.5987	6.40724
pnpE1	MP	9	16.23		-0.81	5.68667	-6.49667	90.3008
pnpE1	MP	9	16.23		-0.99	5.68667	-6.67667	102.3

## Sheet: pnpF
Gene	Experimental condition	Time (h)	Ct	XCt
recA	WMP	0	16.9	16.95
recA	WMP	0	16.85
recA	WMP	0	17.1
Gene	Experimental condition	Time (h)	Ct	XCt
recA	MP	0	15.67	15.9133
recA	MP	0	15.75
recA	MP	0	16.32
Gene	Experimental condition	Time (h)	Ct	XCt
recA	WMP	3	29.28	28.4133
recA	WMP	3	28.1
recA	WMP	3	27.86
Gene	Experimental condition	Time (h)	Ct	XCt
recA	MP	3	31.38	31.3667
recA	MP	3	31.36
recA	MP	3	31.36
Gene	Experimental condition	Time (h)	Ct	XCt
recA	WMP	9	14.92	14.8767
recA	WMP	9	14.84
recA	WMP	9	14.87
Gene	Experimental condition	Time (h)	Ct	XCt
recA	MP	9	17.21	17.1567
recA	MP	9	17.04
recA	MP	9	17.22
Gene	Experimental condition	Time (h)	Ct	X Ct	ΔCt	X Ct WMP	ΔΔCt	2-ΔΔCt	X 2-ΔΔCt	DS
pnpF	WMP	0	23.76	23.67	6.86	6.72	0.14	0.907519	1.00474	0.121367
pnpF	WMP	0	23.62		6.77	6.72	0.05	0.965936
pnpF	WMP	0	23.63		6.53	6.72	-0.19	1.14076
Gene	Experimental condition	Time (h)	Ct	X Ct	ΔCt	X Ct WMP	ΔΔCt	2-ΔΔCt	X 2-ΔΔCt	DS
pnpF	MP	0	22.35	22.3433	6.68	6.72	-0.04	1.02811	1.24661	0.310582
pnpF	MP	0	22.32		6.57	6.72	-0.15	1.10957
pnpF	MP	0	22.36		6.04	6.72	-0.68	1.60214
Gene	Experimental condition	Time (h)	Ct	X Ct	ΔCt	X Ct WMP	ΔΔCt	2-ΔΔCt	X 2-ΔΔCt	DS
pnpF	WMP	3	25.04	25.04	-4.24	-3.37333	-0.866667	1.82344	1.10322	0.626772
pnpF	WMP	3	25.04		-3.06	-3.37333	0.313333	0.80478
pnpF	WMP	3	25.04		-2.82	-3.37333	0.553333	0.681444
Gene	Experimental condition	Time (h)	Ct	X Ct	ΔCt	X Ct WMP	ΔΔCt	2-ΔΔCt	X 2-ΔΔCt	DS
pnpF	MP	3	21.45	21.3633	-9.93	-3.37333	-6.55667	94.1355	99.1092	4.36458
pnpF	MP	3	21.33		-10.03	-3.37333	-6.65667	100.892
pnpF	MP	3	21.31		-10.05	-3.37333	-6.67667	102.3
Gene	Experimental condition	Time (h)	Ct	X Ct	ΔCt	X Ct WMP	ΔΔCt	2-ΔΔCt	X 2-ΔΔCt	DS
pnpF	WMP	9	21.65	21.66	6.73	6.78333	-0.0533333	1.03766	1.00111	0.0572034
pnpF	WMP	9	21.72		6.88	6.78333	0.0966667	0.935191
pnpF	WMP	9	21.61		6.74	6.78333	-0.0433333	1.03049
Gene	Experimental condition	Time (h)	Ct	X Ct	ΔCt	X Ct WMP	ΔΔCt	2-ΔΔCt	X 2-ΔΔCt	DS
pnpF	MP	9	17.8	17.8133	0.59	6.78333	-6.19333	73.1778	69.9644	4.32758
pnpF	MP	9	17.8		0.76	6.78333	-6.02333	65.0435
pnpF	MP	9	17.84		0.62	6.78333	-6.16333	71.6718

## Sheet: pnpD
Gene	Experimental condition	Time (h)	Ct	XCt
recA	WMP	0	16.9	16.95
recA	WMP	0	16.85
recA	WMP	0	17.1
Gene	Experimental condition	Time (h)	Ct	XCt
recA	MP	0	15.67	15.9133
recA	MP	0	15.75
recA	MP	0	16.32
Gene	Experimental condition	Time (h)	Ct	XCt
recA	WMP	3	29.28	28.4133
recA	WMP	3	28.1
recA	WMP	3	27.86
Gene	Experimental condition	Time (h)	Ct	XCt
recA	MP	3	31.38	31.3667
recA	MP	3	31.36
recA	MP	3	31.36
Gene	Experimental condition	Time (h)	Ct	XCt
recA	WMP	9	14.92	14.8767
recA	WMP	9	14.84
recA	WMP	9	14.87
Gene	Experimental condition	Time (h)	Ct	XCt
recA	MP	9	17.21	17.1567
recA	MP	9	17.04
recA	MP	9	17.22
Gene	Experimental condition	Time (h)	Ct	X Ct	ΔCt	X Ct WMP	ΔΔCt	2-ΔΔCt	X 2-ΔΔCt	DS
pnpD	WMP	0	24.12	24.46	7.22	7.51	-0.29	1.22264	1.01206	0.193899
pnpD	WMP	0	24.4		7.55	7.51	0.04	0.972655
pnpD	WMP	0	24.86		7.76	7.51	0.25	0.840896
Gene	Experimental condition	Time (h)	Ct	X Ct	ΔCt	X Ct WMP	ΔΔCt	2-ΔΔCt	X 2-ΔΔCt	DS
pnpD	MP	0	23.75	23.3967	8.08	7.51	0.57	0.673617	1.07487	0.422444
pnpD	MP	0	23.21		7.46	7.51	-0.05	1.03526
pnpD	MP	0	23.23		6.91	7.51	-0.6	1.51572
Gene	Experimental condition	Time (h)	Ct	X Ct	ΔCt	X Ct WMP	ΔΔCt	2-ΔΔCt	X 2-ΔΔCt	DS
pnpD	WMP	3	26.39	26.5267	-2.89	-1.88667	-1.00333	2.00463	1.14338	0.751986
pnpD	WMP	3	26.91		-1.19	-1.88667	0.696667	0.616996
pnpD	WMP	3	26.28		-1.58	-1.88667	0.306667	0.808508
Gene	Experimental condition	Time (h)	Ct	X Ct	ΔCt	X Ct WMP	ΔΔCt	2-ΔΔCt	X 2-ΔΔCt	DS
pnpD	MP	3	22.74	22.8633	-8.64	-1.88667	-6.75333	107.884	99.5782	19.9512
pnpD	MP	3	23.21		-8.15	-1.88667	-6.26333	76.8159
pnpD	MP	3	22.64		-8.72	-1.88667	-6.83333	114.035
Gene	Experimental condition	Time (h)	Ct	X Ct	ΔCt	X Ct WMP	ΔΔCt	2-ΔΔCt	X 2-ΔΔCt	DS
pnpD	WMP	9	23.76	23.64	8.84	8.76333	0.0766667	0.948246	1.0009	0.0519638
pnpD	WMP	9	23.6		8.76	8.76333	-0.00333333	1.00231
pnpD	WMP	9	23.56		8.69	8.76333	-0.0733333	1.05214
Gene	Experimental condition	Time (h)	Ct	X Ct	ΔCt	X Ct WMP	ΔΔCt	2-ΔΔCt	X 2-ΔΔCt	DS
pnpD	MP	9	19.36	19.1867	2.15	8.76333	-6.61333	97.9065	108.523	27.1941
pnpD	MP	9	19.34		2.3	8.76333	-6.46333	88.2383
pnpD	MP	9	18.86		1.64	8.76333	-7.12333	139.424

## Sheet: pnpG
Gene	Experimental condition	Time (h)	Ct	XCt
recA	WMP	0	16.9	16.95
recA	WMP	0	16.85
recA	WMP	0	17.1
Gene	Experimental condition	Time (h)	Ct	XCt
recA	MP	0	15.67	15.9133
recA	MP	0	15.75
recA	MP	0	16.32
Gene	Experimental condition	Time (h)	Ct	XCt
recA	WMP	3	29.28	28.4133
recA	WMP	3	28.1
recA	WMP	3	27.86
Gene	Experimental condition	Time (h)	Ct	XCt
recA	MP	3	31.38	31.3667
recA	MP	3	31.36
recA	MP	3	31.36
Gene	Experimental condition	Time (h)	Ct	XCt
recA	WMP	9	14.92	14.8767
recA	WMP	9	14.84
recA	WMP	9	14.87
Gene	Experimental condition	Time (h)	Ct	XCt
recA	MP	9	17.21	17.1567
recA	MP	9	17.04
recA	MP	9	17.22
Gene	Experimental condition	Time (h)	Ct	X Ct	ΔCt	X Ct WMP	ΔΔCt	2-ΔΔCt	X 2-ΔΔCt	DS
pnpG	WMP	0	22.81	22.7933	5.91	5.84333	0.0666667	0.954842	1.00217	0.0819741
pnpG	WMP	0	22.76		5.91	5.84333	0.0666667	0.954842
pnpG	WMP	0	22.81		5.71	5.84333	-0.133333	1.09682
Gene	Experimental condition	Time (h)	Ct	X Ct	ΔCt	X Ct WMP	ΔΔCt	2-ΔΔCt	X 2-ΔΔCt	DS
pnpG	MP	0	21.65	21.6033	5.98	5.84333	0.136667	0.909618	1.1494	0.376827
pnpG	MP	0	21.66		5.91	5.84333	0.0666667	0.954842
pnpG	MP	0	21.5		5.18	5.84333	-0.663333	1.58374
Gene	Experimental condition	Time (h)	Ct	X Ct	ΔCt	X Ct WMP	ΔΔCt	2-ΔΔCt	X 2-ΔΔCt	DS
pnpG	WMP	3	25.21	25.4267	-4.07	-2.98667	-1.08333	2.11893	1.17985	0.83307
pnpG	WMP	3	26.03		-2.07	-2.98667	0.916667	0.529732
pnpG	WMP	3	25.04		-2.82	-2.98667	0.166667	0.890899
Gene	Experimental condition	Time (h)	Ct	X Ct	ΔCt	X Ct WMP	ΔΔCt	2-ΔΔCt	X 2-ΔΔCt	DS
pnpG	MP	3	21.92	21.8767	-9.46	-2.98667	-6.47333	88.8521	90.738	2.27838
pnpG	MP	3	21.88		-9.48	-2.98667	-6.49333	90.0924
pnpG	MP	3	21.83		-9.53	-2.98667	-6.54333	93.2695
Gene	Experimental condition	Time (h)	Ct	X Ct	ΔCt	X Ct WMP	ΔΔCt	2-ΔΔCt	X 2-ΔΔCt	DS
pnpG	WMP	9	21.83	21.99	6.91	7.11333	-0.203333	1.15136	1.00967	0.167031
pnpG	WMP	9	21.88		7.04	7.11333	-0.0733333	1.05214
pnpG	WMP	9	22.26		7.39	7.11333	0.276667	0.825496
Gene	Experimental condition	Time (h)	Ct	X Ct	ΔCt	X Ct WMP	ΔΔCt	2-ΔΔCt	X 2-ΔΔCt	DS
pnpG	MP	9	18.37	18.3	1.16	7.11333	-5.95333	61.9629	62.7761	4.21379
pnpG	MP	9	18.27		1.23	7.11333	-5.88333	59.0282
pnpG	MP	9	18.26		1.04	7.11333	-6.07333	67.3373

## Sheet: pnpC
Gene	Experimental condition	Time (h)	Ct	XCt
recA	WMP	0	16.9	16.95
recA	WMP	0	16.85
recA	WMP	0	17.1
Gene	Experimental condition	Time (h)	Ct	XCt
recA	MP	0	15.67	15.9133
recA	MP	0	15.75
recA	MP	0	16.32
Gene	Experimental condition	Time (h)	Ct	XCt
recA	WMP	3	29.28	28.4133
recA	WMP	3	28.1
recA	WMP	3	27.86
Gene	Experimental condition	Time (h)	Ct	XCt
recA	MP	3	31.38	31.3667
recA	MP	3	31.36
recA	MP	3	31.36
Gene	Experimental condition	Time (h)	Ct	XCt
recA	WMP	9	14.92	14.8767
recA	WMP	9	14.84
recA	WMP	9	14.87
Gene	Experimental condition	Time (h)	Ct	XCt
recA	MP	9	17.21	17.1567
recA	MP	9	17.04
recA	MP	9	17.22
Gene	Experimental condition	Time (h)	Ct	X Ct	ΔCt	X Ct WMP	ΔΔCt	2-ΔΔCt	X 2-ΔΔCt	DS
pnpC	WMP	0	22.55	22.5867	5.65	5.63667	0.0133333	0.990801	1.00042	0.0358081
pnpC	WMP	0	22.53		5.68	5.63667	0.0433333	0.97041
pnpC	WMP	0	22.68		5.58	5.63667	-0.0566667	1.04006
Gene	Experimental condition	Time (h)	Ct	X Ct	ΔCt	X Ct WMP	ΔΔCt	2-ΔΔCt	X 2-ΔΔCt	DS
pnpC	MP	0	21.55	21.54	5.88	5.63667	0.243333	0.844791	1.01458	0.147825
pnpC	MP	0	21.23		5.48	5.63667	-0.156667	1.11471
pnpC	MP	0	21.84		5.52	5.63667	-0.116667	1.08423
Gene	Experimental condition	Time (h)	Ct	X Ct	ΔCt	X Ct WMP	ΔΔCt	2-ΔΔCt	X 2-ΔΔCt	DS
pnpC	WMP	3	24.38	24.2333	-4.9	-4.18	-0.72	1.64718	1.06975	0.502982
pnpC	WMP	3	24.18		-3.92	-4.18	0.26	0.835088
pnpC	WMP	3	24.14		-3.72	-4.18	0.46	0.726986
Gene	Experimental condition	Time (h)	Ct	X Ct	ΔCt	X Ct WMP	ΔΔCt	2-ΔΔCt	X 2-ΔΔCt	DS
pnpC	MP	3	20.61	20.6233	-10.77	-4.18	-6.59	96.3358	94.5931	2.46472
pnpC	MP	3	20.66		-10.7	-4.18	-6.52	91.7731
pnpC	MP	3	20.6		-10.76	-4.18	-6.58	95.6704
Gene	Experimental condition	Time (h)	Ct	X Ct	ΔCt	X Ct WMP	ΔΔCt	2-ΔΔCt	X 2-ΔΔCt	DS
pnpC	WMP	9	21.87	21.93	6.95	7.05333	-0.103333	1.07425	1.00177	0.0727622
pnpC	WMP	9	21.89		7.05	7.05333	-0.00333333	1.00231
pnpC	WMP	9	22.03		7.16	7.05333	0.106667	0.928731
Gene	Experimental condition	Time (h)	Ct	X Ct	ΔCt	X Ct WMP	ΔΔCt	2-ΔΔCt	X 2-ΔΔCt	DS
pnpC	MP	9	17.68	17.72	0.47	7.05333	-6.58333	95.8917	90.0019	5.64273
pnpC	MP	9	17.69		0.65	7.05333	-6.40333	84.6438
pnpC	MP	9	17.79		0.57	7.05333	-6.48333	89.4701
